# Supplementary material for: Clinician beliefs and attitudes about home haemodialysis: a multinational interview study
Source: PubMed Central journal article supplement — BMJ Open. 2012 Dec 13;2(6):e002146. doi: 10.1136/bmjopen-2012-002146 (PMC3533066; doi:10.1136/bmjopen-2012-002146), 2012-12-13
Supplement: bmjopen-2012-002146.draft_revisions.pdf [file bmjopen-2012-002146.draft_revisions.pdf]

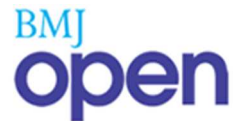

**Clinician beliefs and attitudes about home haemodialysis: A multinational interview study**

|                                 |                                                                                                                                                                                                                                                                                                                                                                                                                                                                                                                                                                                                                                                                                                                                                                                                                                                                               |
|---------------------------------|-------------------------------------------------------------------------------------------------------------------------------------------------------------------------------------------------------------------------------------------------------------------------------------------------------------------------------------------------------------------------------------------------------------------------------------------------------------------------------------------------------------------------------------------------------------------------------------------------------------------------------------------------------------------------------------------------------------------------------------------------------------------------------------------------------------------------------------------------------------------------------|
| Journal:                        | <i>BMJ Open</i>                                                                                                                                                                                                                                                                                                                                                                                                                                                                                                                                                                                                                                                                                                                                                                                                                                                               |
| Manuscript ID:                  | bmjopen-2012-002146                                                                                                                                                                                                                                                                                                                                                                                                                                                                                                                                                                                                                                                                                                                                                                                                                                                           |
| Article Type:                   | Research                                                                                                                                                                                                                                                                                                                                                                                                                                                                                                                                                                                                                                                                                                                                                                                                                                                                      |
| Date Submitted by the Author:   | 21-Sep-2012                                                                                                                                                                                                                                                                                                                                                                                                                                                                                                                                                                                                                                                                                                                                                                                                                                                                   |
| Complete List of Authors:       | Tong, Allison; The University of Sydney, Sydney School of Public Health<br>Palmer, Suetonia; University of Otago, Department of Medicine<br>Manns, Braden; Faculty of Medicine, University of Calgary<br>Craig, Jonathan; University of Sydney, Sydney School of Public Health<br>Ruospo, Marinella; Diaverum Renal Services Group,, Medical Scientific Office<br>Gargano, Letizia; Diaverum Renal Services Group,, Medical Scientific Office<br>Johnson, David; University of Queensland at Princess Alexandra Hospital, School of Medicine<br>Hegbrant, Jorgen; Diaverum Renal Services Group, Diaverum Medical Office<br>Olsson, Mans; Diaverum Renal Services Group, Diaverum Medical Office<br>Fishbane, Steven; Hofstra North Shore-LIH, LIH School of Medicine<br>Strippoli, Giovanni; Consorzio Mario Negri Sud, Department of Clinical Pharmacology and Epidemiology |
| <b>Primary Subject Heading</b>: | Renal medicine                                                                                                                                                                                                                                                                                                                                                                                                                                                                                                                                                                                                                                                                                                                                                                                                                                                                |
| Secondary Subject Heading:      | Renal medicine, Qualitative research, Patient-centred medicine                                                                                                                                                                                                                                                                                                                                                                                                                                                                                                                                                                                                                                                                                                                                                                                                                |
| Keywords:                       | Dialysis < NEPHROLOGY, QUALITATIVE RESEARCH, Adult nephrology < NEPHROLOGY                                                                                                                                                                                                                                                                                                                                                                                                                                                                                                                                                                                                                                                                                                                                                                                                    |
|                                 |                                                                                                                                                                                                                                                                                                                                                                                                                                                                                                                                                                                                                                                                                                                                                                                                                                                                               |

SCHOLARONE™  
Manuscripts

## Clinician beliefs and attitudes about home haemodialysis: A multinational interview study

**Allison Tong**, The Centre for Kidney Research, The Children's Hospital at Westmead, Westmead, NSW 2145 Sydney, Australia; School of Public Health, The University of Sydney, Sydney, NSW, Australia 2006  
*Research Fellow*

**Suetonia Palmer**, Department of Medicine, University of Otago Christchurch, PO Box 4345, Christchurch, 8140, New Zealand  
*Senior Lecturer in medicine, nephrologist*

**Braden Manns**, Department of Medicine and Community Health Sciences, University of Calgary, Canada T2N 2T9  
*Associate Professor, Nephrologist*

**Jonathan C. Craig**, Centre for Kidney Research, The Children's Hospital at Westmead, NSW, Australia 2145; School of Public Health, The University of Sydney, Sydney, NSW, Australia 2006  
*Professor of epidemiology, paediatric nephrologist*

**Marinella Ruospo**, Diaverum Scientific Office, Medical-Scientific Office, Diaverum Renal Services Group, Lund, Sweden  
*Research Officer*

**Letizia Gargano**, Diaverum Scientific Office, Medical-Scientific Office, Diaverum Renal Services Group, Lund, Sweden  
*Dialysis clinical nurse specialist*

**David W. Johnson**, School of Medicine, University of Queensland at Princess Alexandra Hospital, Brisbane, Queensland, Australia 4102  
*Professor of nephrology*

**Jörgen Hegbrant**, Diaverum Medical Office, Diaverum Renal Services Group, Lund, Sweden  
*Chief Medical Officer, nephrologist*

**Måns Olsson**, Diaverum Renal Services Group, Lund, Sweden  
*Head of business development*

**Steven Fishbane**, Hofstra North Shore-LIH School of Medicine, Great Neck NY  
*Chief of Nephrology*

**Giovanni F.M. Strippoli**, Department of Clinical Pharmacology and Epidemiology, Consorzio Mario Negri Sud, Via Nazionale 8/a, 66030, S. Maria Imbaro, Italy; Diaverum Scientific Office, Lund, Sweden; School of Public Health, University of Sydney, Australia, Department of Emergency and Organ Transplantation, University of Bari, Italy  
*Associate Professor of Nephrology*

**Correspondence to:** Giovanni Strippoli, p: +39 3358 756 828 e: [gfmstrippoli@gmail.com](mailto:gfmstrippoli@gmail.com)  
**Word count:** 3601

## Abstract

**Objectives:** To explore clinician beliefs and attitudes about home haemodialysis in global regions where the prevalence of home haemodialysis is low, and to identify barriers to developing home haemodialysis services and possible strategies to increase acceptance and uptake of home haemodialysis.

**Design:** Semi-structured interviews, thematic analysis

**Setting:** 15 dialysis centres in Italy, Portugal, France, Germany, Sweden and Argentina

**Participants:** 28 nephrologists and 14 nurses caring for patients receiving in-centre haemodialysis

**Results:** We identified four major themes as being central to clinician beliefs about home haemodialysis in regions without established services: external structural barriers (ready access to dialysis centres, inadequate housing conditions, unstable economic environment); dialysis centre characteristics (availability of alternative treatments, competing service priorities, commercial interests); clinician responsibility and motivation (preserving safety and security, lack of awareness, knowledge and experience, potential to offer lifestyle benefits, professional interest and advancement); and cultural apprehension (an unrelenting imposition, carer burden, attachment to professional healthcare provision, limited awareness).

**Conclusions:** Despite recognising the potential benefits of home haemodialysis, clinicians practising in Europe and South America felt apprehensive and doubted the feasibility of home haemodialysis programs. Programs that provide clinicians with direct experience of home haemodialysis could increase acceptance and motivation for home-based haemodialysis, as might service prioritisation and funding models that favour home haemodialysis.

1  
2  
3 **Article summary**  
4  
5  
6  
7

8  
9 **Article focus:**  
10

- 11 • To elicit clinician beliefs and attitudes about home haemodialysis in global regions where the  
12 prevalence of home haemodialysis is low.  
13
- 14 • To identify barriers to developing home haemodialysis services and possible strategies to  
15 increase acceptance and uptake of home haemodialysis.  
16  
17  
18  
19

20 **Key messages:**  
21

- 22 • Nephrologists and dialysis nurses in regions where home haemodialysis is not established  
23 recognise the potential benefits but are pessimistic about the feasibility of developing such  
24 programs  
25
- 26 • Direct clinician experience and education as well as improved reimbursement for home  
27 haemodialysis may assist the establishment of home haemodialysis services  
28  
29
- 30 • Clinicians express concern about the quality and safety of home haemodialysis, which may be  
31 addressed by increased experience of home dialysis care  
32  
33  
34  
35  
36  
37

38 **Strengths and limitations of this study:**  
39

- 40 • We actively sought a broad range of views and experiences through purposive sampling.  
41
- 42 • Our study included only clinicians within a large dialysis service provider in Europe and South  
43 America.  
44  
45  
46  
47  
48  
49  
50  
51  
52  
53  
54  
55  
56  
57  
58  
59  
60

## Introduction

Approximately 2 million people worldwide receive chronic dialysis treatment for end-stage kidney disease with annual direct healthcare costs that exceed USD 60 billion.<sup>1</sup> The global dialysis population is expanding rapidly in the context of constrained workforce and financial resources. In the last decade the haemodialysis populations in China, India, and Brazil increased 15% each year<sup>2</sup> and in Australia the dialysis population nearly doubled.<sup>3</sup> People who require dialysis treatment experience severely impaired quality of life and role function and have a markedly increased risk of mortality compared to the general population.

Approximately 10% to 20% of people on in-centre haemodialysis die each year and only about 10% are employed.<sup>5</sup> In contrast to in-centre dialysis, people on home haemodialysis may experience a life-expectancy approaching that of a deceased donor kidney transplant recipient.<sup>6</sup> When analyses are controlled for comorbidity, home haemodialysis is associated with better outcomes than in-centre haemodialysis for most measures of effectiveness.<sup>6,7</sup>

Although home haemodialysis is consistently associated with markedly improved quality of life and patient rehabilitation, the prevalence of home haemodialysis as a proportion of all dialysis care varies nearly 100-fold globally. Home haemodialysis is common in New Zealand and Australia (20% of all dialysis patients) but is rare or unavailable in parts of Europe and Scandinavia, the United States, and South America.<sup>8</sup> The reasons for the wide variation in uptake are unclear, although higher home haemodialysis use is characterised by local advocacy and experience combined with service centralisation and favourable reimbursement.<sup>9,10</sup> When patients are educated about home dialysis therapies, about one-half

1  
2  
3 choose self-care dialysis<sup>11</sup> and National Institute for Clinical Excellence (NICE) guidelines  
4  
5 recommend that all suitable patients should be offered the choice between home  
6  
7 haemodialysis and in-centre haemodialysis in a hospital or satellite clinic.<sup>12</sup>  
8  
9

10  
11  
12 Clinicians are critical to the effective implementation of home haemodialysis services<sup>13 14</sup> to  
13  
14 improve patient choice and facilitate increased dialysis service capacity in response to  
15  
16 expanding patient populations.<sup>15</sup> To date there is little published research describing the  
17  
18 attitudes of clinicians toward home haemodialysis in areas where home haemodialysis is rare  
19  
20 or non-existent. In view of the absence of home haemodialysis programmes in some areas  
21  
22 within Europe, Scandinavia, and South America, the aim of this study was to explore the  
23  
24 perceptions of home haemodialysis from nephrologists and dialysis nurses in these regions.  
25  
26  
27

## 28 29 30 **Methods**

31  
32  
33  
34 We invited practicing nephrologists and dialysis nurses from Europe and South America  
35  
36 (France, Germany, Italy, Portugal, Sweden, and Argentina) involved in the care of patients on  
37  
38 chronic haemodialysis in facilities that do not currently provide home haemodialysis services.  
39  
40 We used purposive sampling to select both male and female clinicians from a several  
41  
42 geographical areas in Europe and South America and with diverse clinical experience of  
43  
44 haemodialysis to ensure a broad range of views and experiences of haemodialysis provision.  
45  
46 All participants were recruited from centres within Diaverum, a large dialysis service  
47  
48 provider. Details of dialysis services provision and reimbursement in the participating  
49  
50 countries are provided in **Table 1**. In all contributing countries, access to dialysis services is  
51  
52  
53  
54

1  
2  
3 universal, but the percentage of private providers and reimbursement models varies to a great  
4 extent. Ethics approval was provided by all participating centres.  
5  
6  
7  
8  
9

10 To elicit clinician beliefs and experiences, we developed a semi-structured interview guide  
11 based on a literature review on home haemodialysis (any haemodialysis at home including  
12 thrice weekly dialysis or frequent haemodialysis performed during the day or night) <sup>16-25</sup> and  
13 discussions between the research team (**Box 1**). The interviews focused on knowledge of  
14 home haemodialysis, perceived benefits and risks, potential facilitators and barriers to home  
15 haemodialysis, training and support needs of clinicians, and clinical attitudes toward home  
16 haemodialysis. One author (AT) conducted a face-to-face semi-structured qualitative  
17 interview with each participant. An interpreter was present during interviews with non-  
18 English speaking participants (n=20). We ceased recruitment when theoretical saturation was  
19 reached. We recorded contextual details after each interview. We digitally audio-recorded  
20 and transcribed verbatim all interviews in full.  
21  
22  
23  
24  
25  
26  
27  
28  
29  
30  
31  
32  
33  
34  
35  
36

37 We entered transcripts into a software package for storing, coding and searching qualitative  
38 data (HyperRESEARCH Version 3.0.2., ResearchWare, Inc., 2011  
39 [<http://www.research.com>]). Drawing on grounded theory and thematic analysis, <sup>26 27</sup> one  
40 author (AT) coded the transcripts and recorded concepts inductively, grouped similar  
41 concepts, and identified patterns and relationships in the data. The coding structure was  
42 refined until we captured all concepts relating to the perspectives of clinician beliefs and  
43 attitudes about home haemodialysis. To enhance the analytical framework and potential for  
44  
45  
46  
47  
48  
49  
50  
51  
52  
53  
54  
55  
56  
57  
58  
59  
60

1  
2  
3 offering meaningful insight, interpretation of the data and preliminary themes was discussed  
4  
5 by the research team.  
6  
7

## 8 9 10 **Results**

11  
12  
13  
14 We interviewed 42 of 43 invited clinicians (98%) in October and November 2011. One could  
15  
16 not participate because of clinical commitments. Each interview lasted between 25 to 50  
17  
18 minutes. Most participants were nephrologists (n=28), were from Portugal (n=16) or France  
19  
20 (n=13) and were men (n=29) (**Table 1**). The clinicians had between 4 and 28 years of  
21  
22 nephrology experience and ten had previous experience in home haemodialysis.  
23  
24

25  
26 In our analytical framework we identified four themes that were central to clinician beliefs  
27  
28 and attitudes towards home haemodialysis: structural barriers (ready access to existing  
29  
30 treatment, inadequate housing, unstable economic environment), dialysis centre  
31  
32 characteristics (alternative treatment options, competing service priorities, commercial  
33  
34 interests), clinician responsibility and motivation (safety and security, knowledge and  
35  
36 awareness, lifestyle benefits, professional development), and cultural apprehension  
37  
38 (unrelenting imposition, carer burden, attachment to professionals, limited awareness)  
39  
40 (Figure 1). Table 2 provides a selection of quotes from the clinicians to illustrate each theme.  
41  
42  
43  
44

### 45 **Structural barriers**

46  
47  
48  
49  
50 The theme of structural barriers encompassed views on the physical and financial barriers to  
51  
52 home haemodialysis that were believed reduce the motivation and capacity of providers to  
53  
54



1  
2  
3 offer home haemodialysis programs. Access to dialysis centres related to the close proximity  
4  
5 of most patients to existing dialysis services that clinicians thought reduced the need for  
6  
7 home-based care. Housing conditions emphasised the concerns of clinicians that  
8  
9 accommodation and utilities were frequently inadequate to support home haemodialysis. The  
10  
11 economic environment described the widespread anxiety felt by clinicians that dialysis  
12  
13 providers and patients could not afford new home haemodialysis initiatives, particularly in  
14  
15 the current financial climate.  
16  
17

18  
19  
20  
21 *Ready access to dialysis centres*—Almost all clinicians perceived that ready access to  
22  
23 existing dialysis clinics and patient transport reimbursement reduced the need for home  
24  
25 haemodialysis and, because of this, acquisition of capital equipment for home haemodialysis  
26  
27 might be unjustified.  
28  
29

30  
31  
32 *Inadequate housing conditions*—Clinicians considered that home haemodialysis was  
33  
34 impossible for patients with small houses or inadequate hygiene. However, when prompted,  
35  
36 many participants acknowledged they were not familiar with the smaller size of  
37  
38 haemodialysis machines designed for home use. Clinicians mentioned that some patients  
39  
40 could not access clean water or did not own their homes and were therefore were not  
41  
42 permitted to make necessary plumbing or electrical modifications.  
43  
44  
45

46  
47  
48 *Unstable economic environment*—Clinicians believed that the feasibility of establishing  
49  
50 home haemodialysis programs is determined by dedicated government funding which was  
51  
52 unlikely in the present economic climate. Most clinicians were employed by dialysis  
53  
54

1  
2  
3 providers in European countries in financial crisis which, together with government health  
4 budget cuts, were perceived as significant barriers to developing home haemodialysis  
5 services, particularly as they felt the financial risks of such programs were uncertain.  
6  
7  
8  
9

### 10 11 12 **Dialysis centre characteristics** 13

14  
15  
16 The theme centre capacity described the features of dialysis centre practice that quell demand  
17 for home haemodialysis. Alternative treatment options referred to clinic centres offering  
18 home-based peritoneal dialysis and self-care haemodialysis services in preference to home  
19 haemodialysis to offer patients more flexibility and autonomy. Competing priorities related to  
20 the need for dialysis centres to focus on specific dialysis programs often at the expense of  
21 home haemodialysis initiatives because of limited resources and reimbursement policies.  
22  
23  
24  
25  
26  
27  
28

29  
30 Commercial interests described clinician anxiety over the lack of centralised reimbursement  
31 for home haemodialysis; most felt that increased uptake of home haemodialysis would reduce  
32 dialysis provider income and, as a consequence, impact clinician job security.  
33  
34  
35  
36  
37  
38

39 *Availability of alternative treatments*—Clinicians believed that alternative programs offered  
40 by dialysis clinics weakened the demand for home haemodialysis programs. Such treatment  
41 options, which improve patient autonomy at lower cost, include in-centre self or limited care  
42 haemodialysis, in-centre nocturnal haemodialysis, and home peritoneal dialysis.  
43  
44  
45  
46  
47  
48  
49

50 *Competing service priorities*—All clinicians believed that dialysis centres should deliver high  
51 quality care and endeavour to maximise patient satisfaction. Some felt that their centre had  
52  
53  
54  
55  
56  
57  
58  
59  
60

1  
2  
3 insufficient staff and centre facilities to support home haemodialysis training and sustain  
4  
5 home haemodialysis programmes. In addition, some centres were focused on establishing and  
6  
7 maintaining other newer treatment programs including in-centre nocturnal haemodialysis as  
8  
9 well as home peritoneal dialysis and, accordingly, could not diversify further resources into  
10  
11 home haemodialysis programs. Some clinicians suggested that centres which had reached  
12  
13 maximum capacity could consider offering home haemodialysis.  
14  
15  
16  
17  
18

19 *Commercial interests*—Some clinicians acknowledged that dialysis in their regions is an  
20  
21 “industry.” They speculated that centres would incur an overall financial loss if home  
22  
23 haemodialysis was offered. Some were anxious that their centre would lose patients and  
24  
25 income if home haemodialysis was offered, and staff might be made redundant as a result.  
26  
27 Clinicians believed dialysis providers would not invest in new infrastructure for home  
28  
29 haemodialysis programs if the capital and service-related expenses were not reimbursed by  
30  
31 government at the levels currently provided for in-centre haemodialysis. Clinicians believed  
32  
33 centres needed to be sufficiently incentivised by health systems to provide home  
34  
35 haemodialysis at rates comparable to in-centre haemodialysis before home haemodialysis  
36  
37 could be commenced in their centres.  
38  
39  
40  
41  
42

### 43 **Clinician responsibility and motivation**

44  
45  
46  
47 The theme clinician responsibility and motivation described the ways in which the clinicians  
48  
49 view their roles in dialysis care. Participants believed that home haemodialysis is beneficial  
50  
51 for patients, but while they are interested in the idea, they are reluctant to relinquish control  
52  
53  
54  
55

1  
2  
3 and defer responsibilities of medical care to patients and their carers. Preserving quality and  
4  
5 safety referred to the need by clinicians to be directly involved in dialysis processes to ensure  
6  
7 their patients were safe on treatment. Lack of awareness, knowledge, and experience  
8  
9 reflected the clinician's own anxieties that they are less knowledgeable in home  
10  
11 haemodialysis but retain a desire to learn more about home haemodialysis. Potential to offer  
12  
13 lifestyle benefits encompassed the understanding of clinicians that home haemodialysis  
14  
15 provides patients with considerable autonomy and self-reliance that can improve their own  
16  
17 functioning and quality of life. Professional interest and advancement described the interest  
18  
19 clinicians have in learning more about home haemodialysis to increase their own professional  
20  
21 skills.  
22  
23  
24  
25  
26  
27

28 *Preserving safety and security*—Clinicians frequently identified quality and safety as key  
29  
30 healthcare priorities within their practice and anticipated that home haemodialysis would  
31  
32 diminish their capacity to protect the well-being of their patients. They voiced concern that  
33  
34 patient monitoring would be less with home haemodialysis and that patients may not adhere  
35  
36 to their prescribed regimens. Also, they believed patients and carers would not safely manage  
37  
38 complications such as infections or cardiovascular events. Dialysis was perceived to require  
39  
40 medical and technical expertise. Clinicians believed that most patients were too old,  
41  
42 dependent, sick, or did not have a suitable carer to have haemodialysis safely at home.  
43  
44 Respondents felt that some patients were unable to maintain proper hygiene standards, or  
45  
46 understand the technical requirements of haemodialysis due to low socioeconomic and  
47  
48 education levels.  
49  
50  
51  
52  
53  
54  
55  
56  
57  
58  
59  
60

1  
2  
3  
4  
5  
6  
7  
8  
9  
10  
11  
12  
13  
14  
15  
16  
17  
18  
19  
20  
21  
22  
23  
24  
25  
26  
27  
28  
29  
30  
31  
32  
33  
34  
35  
36  
37  
38  
39  
40  
41  
42  
43  
44  
45  
46  
47  
48  
49  
50  
51  
52  
53  
54  
55  
56  
57  
58  
59  
60

*Lack of awareness, knowledge and experience*—Many clinicians acknowledged that they lacked sufficient knowledge and awareness about home haemodialysis to be confident about it as a treatment option and suggested they needed more information. For example, they suggested that learning about the experiences of home haemodialysis from colleagues and patients in other regions with established programmes would increase the potential for development of home haemodialysis services in their own centres.

*Potential to offer lifestyle benefits*—Clinicians identified numerous benefits of home haemodialysis, which they perceived were predominantly related to patient empowerment and lifestyle, including autonomy, flexibility, comfort and privacy, ability to work, freedom, and increased time. Many believed that home haemodialysis was good particularly for young employed patients and a few suggested that longer dialysis sessions would improve clinical parameters and reduce the need for medications.

*Professional interest and advancement*—Some participants, both nephrologists and nurses, were interested and enthusiastic about offering home haemodialysis, particularly if they believed it would benefit patients. For some, home haemodialysis is a “new” technique which would enable them to acquire additional professional skills and experiences and be better clinicians.

### **Cultural apprehension**

1  
2  
3 The theme cultural apprehension described the concerns that clinicians have about the  
4 disruption to families caused by home haemodialysis and burden of medical responsibility  
5 placed on unwilling patients and their carers by home based care. The clinicians emphasised  
6 that most patients have close family networks and would be unwilling to encumber family  
7 members with the “burden” of dialysis. They believed that patients highly value and depend  
8 on professional medical care within a clinic setting, and if severed, this might cause distress.  
9  
10 Unrelenting imposition encompassed the clinicians’ beliefs that patients would prefer to keep  
11 dialysis away from the home environment and their family and friends. Carer burden  
12 reflected the concern that clinicians hold for the ability of carers to cope with the long term  
13 responsibility for home haemodialysis. Attachments to professional healthcare provision  
14 highlighted the belief held by clinicians that patients desire the security, support, and safety  
15 of in-centre care.  
16  
17  
18  
19  
20  
21  
22  
23  
24  
25  
26  
27  
28  
29  
30  
31

32 *An unrelenting imposition*—Almost all clinicians were convinced that many patients would  
33 be resistant to home haemodialysis and averse to bringing the disease home. Clinicians  
34 believed patients did not want dialysis to disrupt their normality and impinge on everyday  
35 lives. They predicted patients might not wish to have a haemodialysis machine at home as it  
36 would serve as a constant reminder of their disease. Clinicians spoke of home haemodialysis  
37 as being confronting for family and friends and that patients would be unwilling to impose an  
38 unnecessary burden on their families.  
39  
40  
41  
42  
43  
44  
45  
46  
47  
48  
49

50 *Carer burden*—Some clinicians were apprehensive that home haemodialysis would be an  
51 overwhelming burden on family carers. They believed family members were not able  
52  
53  
54  
55  
56  
57  
58  
59  
60

1  
2  
3 perform dialysis, monitor the patient's health status, and manage complications. Clinicians  
4  
5 felt that carers might experience considerable pressure, stress and anxiety.  
6  
7

8  
9  
10 *Attachments to professional healthcare provision*—Clinicians believed that patients relied on  
11  
12 doctors for health-related issues and felt safer receiving care in a medical unit. At a  
13  
14 community level, health education and promotion of self-management for chronic diseases  
15  
16 was generally lacking in the participating regions. Many clinicians anticipated that patients  
17  
18 would feel apprehensive and refuse to “cut the umbilical cord with the clinic”. They  
19  
20 perceived that home based care might disconnect patients from social support of staff and  
21  
22 other patients, impair access to clinicians, and reduce safety. Clinicians felt that separation  
23  
24 from in-centre care would be particularly difficult for patients with a longer previous  
25  
26 experience of in-centre haemodialysis care. They believed patients would be anxious about  
27  
28 taking responsibility for complicated and technical medical tasks.  
29  
30  
31  
32  
33

34 *Limited awareness*—The participants acknowledged that treatment choices made by patients  
35  
36 are shaped by the way doctors present treatment options, which was almost always an “active  
37  
38 promotion” of in-centre haemodialysis. They believed that patients generally trust and  
39  
40 willingly accept treatment recommendations without hesitation. Home haemodialysis was  
41  
42 rarely discussed in clinic consultations and many patients were not aware that home  
43  
44 haemodialysis might be a treatment choice.  
45  
46  
47  
48

## 49 **Discussion**

50  
51  
52  
53  
54  
55

1  
2  
3 The four themes encompassing clinician beliefs and perceptions of home haemodialysis in  
4 regions without established services (external structural barriers, centre capacity, clinician  
5 responsibility and motivation, and cultural apprehension) are useful when considering  
6 strategies to increase acceptance and uptake of home haemodialysis. Clinicians generally  
7 recognise the benefits of home haemodialysis for patients including increased empowerment,  
8 autonomy, and flexibility; however, they are apprehensive about providing home  
9 haemodialysis services and doubt the feasibility of such programs within their regions.  
10 Clinicians perceive that patient proximity to dialysis centres and readily available alternative  
11 dialysis modalities negate patient demand for home haemodialysis. Barriers to the  
12 establishment of home haemodialysis services included reimbursement rates for in-centre  
13 haemodialysis, cultural expectations of the clinician's role in medical care, as well as a strong  
14 perception that home haemodialysis could be an unrelenting, overwhelming and unwarranted  
15 burden on their families. Clinicians suggested that their own direct experience of home  
16 haemodialysis could provide confidence in home haemodialysis which, combined with their  
17 own existing professional interest in providing a broad range of treatment options to patients  
18 and families, would increase their motivation to advocate for home haemodialysis services.

19  
20  
21  
22  
23  
24  
25  
26  
27  
28  
29  
30  
31  
32  
33  
34  
35  
36  
37  
38  
39  
40  
41 Research on treatment choices when approaching the need for dialysis suggests that when  
42 patients are fully informed about dialysis modality options, about half choose self-care  
43 dialysis (peritoneal dialysis or haemodialysis) and another 15% choose limited-care clinic-  
44 based haemodialysis.<sup>11</sup> Evidence also indicates that what a clinician believes about patient  
45 survival, treatment effectiveness and quality of life for each dialysis modality strongly  
46 influences the uptake of home haemodialysis. Conversely, limited training or experience in  
47  
48  
49  
50  
51  
52  
53  
54



1  
2  
3 home therapies reduces clinician confidence in home-based care.<sup>14</sup> A dialysis centre  
4  
5 “champion” for home haemodialysis is considered pivotal to increasing and sustaining home-  
6  
7 based dialysis services.<sup>14</sup> These data suggest that increasing clinician’s knowledge and  
8  
9 experience of home haemodialysis in areas without home dialysis services could facilitate the  
10  
11 development of home haemodialysis and, in doing so, broaden dialysis treatment choices for  
12  
13 patients.  
14  
15

16  
17  
18  
19 Increased patient responsibility and control over the management of chronic diseases reduces  
20  
21 symptom severity and improves both patient confidence and clinical outcomes.<sup>28-30</sup>  
22

23 Although home haemodialysis fulfils many tenets of patient-centred care ideology<sup>28 31</sup> and,  
24  
25 accordingly, has the potential to improve outcomes for people who have end-stage kidney  
26  
27 disease, it is apparent that shifting the responsibility for chronic illness management of end-  
28  
29 stage kidney disease toward patients and carers is confronting for clinicians who are  
30  
31 unfamiliar with and inexperienced in home haemodialysis. This perception is potentially in  
32  
33 conflict with the views expressed by patients and carers with experience of earlier stages of  
34  
35 chronic kidney disease not requiring dialysis for whom treatment choices are prioritised by  
36  
37 maximising quality of life.<sup>16</sup>  
38  
39  
40  
41  
42

43 Financial reimbursement for home haemodialysis is a central concern for the interviewed  
44  
45 clinicians. Central reimbursement and regulations governing funding for long-term dialysis  
46  
47 vary considerably across healthcare jurisdictions and may be responsible in part for variable  
48  
49 implementation of home haemodialysis services. Although home haemodialysis is markedly  
50  
51 cheaper than in-centre care,<sup>32-34</sup> few health systems differentiate between dialysis modalities  
52  
53  
54

1  
2  
3 in funding models.<sup>35</sup> In The Netherlands and some states in Australia, home haemodialysis is  
4  
5 incentivised with a higher reimbursement rate than for in-centre haemodialysis, and in the  
6  
7 United Kingdom and Ontario, Canada, reimbursement of home haemodialysis is similar to  
8  
9 in-centre care but reimbursement includes funding for longer hours or extended frequency  
10  
11 dialysis at home. The Belgian health system provides a bonus if a certain number of patients  
12  
13 in a facility perform self-care or home haemodialysis, peritoneal dialysis or transplantation,<sup>35</sup>  
14  
15 while in New Zealand, regional authorities are given overall budgets for renal services,  
16  
17 effectively encouraging home therapies through the incentive for providers to lower overall  
18  
19 costs of care.<sup>36</sup> Funding models that incentivise home haemodialysis in areas of low uptake  
20  
21 would similarly reduce costs to health systems as a whole and directly motivate clinicians  
22  
23 and providers to prioritise new home dialysis programmes.  
24  
25  
26  
27  
28  
29

30 Our study included only clinicians within a large dialysis service provider in Europe and  
31  
32 South America. While the study included a broad range of perspectives, the findings may not  
33  
34 be generalisable to other countries or health provider settings. However, the findings  
35  
36 resonate with barriers to home haemodialysis identified by other studies.<sup>23 37</sup> In common with  
37  
38 other qualitative studies, we cannot assume our findings are representative of the whole  
39  
40 clinician population, although we actively sought a broad range of views and experiences  
41  
42 through purposive sampling. For interviews with non-English participants, some cultural or  
43  
44 linguistic nuances may not have been captured; however, the concepts and themes we  
45  
46 identified were comparable to those that arose from interviews with English-speaking  
47  
48 participants.  
49  
50  
51  
52  
53  
54  
55  
56  
57  
58  
59  
60

1  
2  
3 Inequalities in global access to home haemodialysis exist within many health systems. A  
4  
5 better understanding of the barriers to home haemodialysis that are relevant to specific health  
6  
7 systems and regions is critical to overcoming them. Using our thematic framework together  
8  
9 with published international experience<sup>37-41</sup> we suggest strategies to foster uptake of home  
10  
11 haemodialysis (**Table 3**). Clinician enthusiasm for a dialysis modality is a key determinant of  
12  
13 the proportion of patients that are treated with that modality<sup>12</sup>; as such, addressing clinician  
14  
15 attitudinal, knowledge and experience barriers may increase acceptance and motivation to  
16  
17 establish home haemodialysis programs. We suggest increasing clinician competence and  
18  
19 familiarity with home haemodialysis is a necessary component of expanding home  
20  
21 haemodialysis care in regions without existing services. Professional education and training  
22  
23 for clinicians could involve interactive seminars with healthcare providers who have  
24  
25 experience in home haemodialysis, visits to other centres to gain hands-on clinical experience  
26  
27 in home haemodialysis,<sup>37</sup> and the support of a “local champion” for home haemodialysis.<sup>12</sup>  
28  
29 Clinicians frequently voice concerns about patient safety suggesting that specific strategies  
30  
31 are needed to minimise potential risks for clinicians and patients in home haemodialysis  
32  
33 programs. These might include 24-hour access to a home haemodialysis clinician, increased  
34  
35 patient and physician education and training, and specific carer support. More work is needed  
36  
37 to determine fully patients’ and clinicians’ views on the design and delivery of such services.  
38  
39  
40  
41  
42  
43  
44

45 The observational nature of the existing evidence for home haemodialysis together with the  
46  
47 concerns that clinicians raise over the safety and durability of home haemodialysis support  
48  
49 the need for a randomised trial evaluating the effectiveness and safety of home  
50  
51 haemodialysis. In addition, research could evaluate the effectiveness of targeted interventions  
52  
53  
54

1  
2  
3 or strategies to overcome the identified barriers to home haemodialysis (such as small-scale  
4  
5 implementation of home haemodialysis in selected centres, patient-friendly technology,  
6  
7 improved reimbursement, and clinician education programmes) to increase the uptake of  
8  
9 home haemodialysis.  
10  
11

12  
13  
14 This analysis suggests potential barriers to the development of home haemodialysis  
15  
16 programmes specific to regions without active home haemodialysis services that include  
17  
18 structural barriers, competing treatment choices and services, the role of the clinician in care,  
19  
20 and cultural perspectives within health delivery. Specific strategies to address these issues  
21  
22 may increase access to home haemodialysis in some global regions.  
23  
24  
25  
26  
27  
28  
29  
30  
31  
32  
33  
34  
35  
36  
37  
38  
39  
40  
41  
42  
43  
44  
45  
46  
47  
48  
49  
50  
51  
52  
53  
54  
55  
56  
57  
58  
59  
60

## Acknowledgements

We would like to thank all the clinicians who volunteered their time to participate in this study.

## Copyright/licence for publication

The Corresponding Author has the right to grant on behalf of all authors and does grant on behalf of all authors, a worldwide licence to the Publishers and its licensees in perpetuity, in all forms, formats and media (whether known now or created in the future), to i) publish, reproduce, distribute, display and store the Contribution, ii) translate the Contribution into other languages, create adaptations, reprints, include within collections and create summaries, extracts and/or, abstracts of the Contribution, iii) create any other derivative work(s) based on the Contribution, iv) to exploit all subsidiary rights in the Contribution, v) the inclusion of electronic links from the Contribution to third party material where-ever it may be located; and, vi) licence any third party to do any or all of the above.

## Declaration of competing interests

All authors have completed the Unified Competing Interest form at [www.icmje.org/coi\\_disclosure.pdf](http://www.icmje.org/coi_disclosure.pdf) (available on request from the corresponding author) and declare: the study has been part-funded by an unrestricted grant from Diaverum AB, a global provider of renal services. The study sponsor commissioned the work to an independent steering committee and had no role in study design; collection, analysis, and interpretation of data; writing the report; and the decision to submit the report for publication; AT is supported

1  
2  
3 by the National Health and Medical Research Council Early Career Fellowship ID 1037162;  
4  
5 SP is supported in part by an by an unrestricted grant from Amgen Dompé administered by  
6  
7 the Mario Negri Sud Consortium, Italy; DJ has received research grants, travel sponsorships  
8  
9 and consultancy fees from Baxter Healthcare and Fresenius Medical Care and is a current  
10  
11 recipient of a Queensland Government Health Research Fellowship. JH is Chief Medical  
12  
13 Officer at Diaverum AB, a global provider of renal services; GFMS is Senior Vice President  
14  
15 scientific affairs at Diaverum AB, a global provider of renal services: no other relationships  
16  
17 or activities that could appear to have influenced the submitted work.  
18  
19  
20  
21  
22

### 23 **Details of contributors**

24  
25 All authors, external and internal, had full access to all of the data in the study and can take  
26  
27 responsibility for the integrity of the data and the accuracy of the data analysis.  
28  
29  
30  
31

### 32 **Contributions**

33  
34 AT participated in the design of the study, did the interviews, transcribed the interviews,  
35  
36 carried out the thematic analysis and drafted the manuscript. SP designed the study,  
37  
38 participated in the thematic analysis and critical review of the first and subsequent manuscript  
39  
40 drafts. BM and JC provided intellectual input into first and subsequent manuscript drafts and  
41  
42 assisted with thematic analysis. MR and LG assisted with interviews and provided  
43  
44 intellectual input into subsequent manuscript drafts. DWJ assisted with thematic analysis and  
45  
46 provided intellectual input into primary and subsequent drafts. JH and MO provided  
47  
48 intellectual input into subsequent manuscript drafts. GS conceived the study, obtained  
49  
50  
51  
52  
53  
54  
55  
56  
57  
58  
59  
60

1  
2  
3 funding, assisted with study design and thematic analysis, provided intellectual input into  
4  
5 subsequent manuscript drafts and is the guarantor.  
6  
7  
8  
9

### 10 **Ethics approval**

11 Ethics approval was obtained for the study as follows:

12  
13 -for participants from France we received ethic approval from Comité de Protection des  
14  
15 Personnes Sud-Méditerranée II, 2011-AO1044-37

16  
17

18 -for participants from Diaverum (Portugal, Sweden, Germany, Argentina) we received ethic

19 approval from Comissão de Ética da Diaverum, aprovação n. 01/2011  
20  
21

22 -for Italy we informed ethics committees according to Italian law (Italian  
23  
24

25 Republic. Determination of the Italian Medicines Agency of March 20, 2008 [in  
26  
27

28 Italian]. *Official Gazette of the Italian Republic*. General Series No. 76; March 31, 2008).  
29

30 For Argentina there was no requirement for ethics submissions for this type of study.  
31

32 All participants provided written voluntary informed consent.  
33  
34  
35  
36

### 37 **Data sharing**

38 No additional data available  
39  
40  
41  
42  
43  
44  
45  
46  
47  
48  
49  
50  
51  
52  
53  
54  
55  
56  
57  
58  
59  
60

## References

1. Atkins RC. The changing patterns of chronic kidney disease: The need to develop strategies for prevention relevant to different regions and countries. *Kidney Int* 2005;68(S98):S83-S85.
2. Renal disease in minority populations and developing nations. Proceedings of a satellite meeting of the World Congress of Nephrology. April 25-27, 2007. Petropolis, Brazil. *Ethnicity & disease* 2009;19(1 Suppl 1):S1-1-89.
3. Cass A, Chadban S, Gallagher M, Howard K, Jones A, McDonald S, et al. The economic impact of end-stage kidney disease in Australia. Projections to 2020. Available at [www.kidney.org.au](http://www.kidney.org.au): Kidney Health Australia, Melbourne, Australia, 2010.
4. U.S. Renal Data System, USRDS 2009 Annual Data Report: Atlas of End-Stage Renal Disease in the United States, National Institutes of Health, National Institute of Diabetes and Digestive and Kidney Diseases, Bethesda, MD, 2009.
5. Julius M, Kneisley JD, Carpentier-Altling P, Hawthorne VM, Wolfe RA, Port FK. A comparison of employment rates of patients treated with continuous ambulatory peritoneal dialysis vs in-center hemodialysis (Michigan End-Stage Renal Disease Study). *Archives of internal medicine* 1989;149(4):839-42.
6. Pauly RP, Gill JS, Rose CL, Asad RA, Chery A, Pierratos A, et al. Survival among nocturnal home haemodialysis patients compared to kidney transplant recipients. *Nephrology, dialysis, transplantation : official publication of the European Dialysis and Transplant Association - European Renal Association* 2009;24(9):2915-9.
7. Rocco MV, Lockridge J, Beck GJ, Eggers PW, Gassman JJ, Greene T, et al. The effects of frequent nocturnal home hemodialysis: The Frequent Hemodialysis Network Nocturnal Trial. *Kidney International* 2011;80(10):1080-91.
8. MacGregor MS, Agar JW, Blagg CR. Home haemodialysis-international trends and variation. *Nephrology, dialysis, transplantation : official publication of the European Dialysis and Transplant Association - European Renal Association* 2006;21(7):1934-45.
9. Honkanen EO, Rauta VM. What happened in Finland to increase home hemodialysis? *Hemodial Int* 2008;12 Suppl 1:S11-5.
10. George CR. Caring for kidneys in the antipodes: how Australia and New Zealand have addressed the challenge of end-stage renal failure. *American journal of kidney diseases : the official journal of the National Kidney Foundation* 2009;53(3):536-45.



- 1  
2  
3  
4  
5  
6  
7  
8  
9  
10  
11  
12  
13  
14  
15  
16  
17  
18  
19  
20  
21  
22  
23  
24  
25  
26  
27  
28  
29  
30  
31  
32  
33  
34  
35  
36  
37  
38  
39  
40  
41  
42  
43  
44  
45  
46  
47  
48  
49  
50  
51  
52  
53  
54  
55  
56  
57  
58  
59  
60
11. Goovaerts T, Jadoul M, Goffin E. Influence of a pre-dialysis education programme (PDEP) on the mode of renal replacement therapy. *Nephrology, dialysis, transplantation : official publication of the European Dialysis and Transplant Association - European Renal Association* 2005;20(9):1842-47.
  12. Castledine C, Gilg J, Rogers C, Ben-Shlomo Y, Caskey F. UK Renal Registry. The Thirteenth Annual Report. Bristol UK: The Renal Association, 2010.
  13. Damschroder LJ, Aron DC, Keith RE, Kirsh SR, Alexander JA, Lowery JC. Fostering implementation of health services research findings into practice: a consolidated framework for advancing implementation science. *Implement Sci* 2009;4:50.
  14. Casteldine C, Gilg J, Rogers C, Ben-Shiomo Y, Caskey F. RRT incidence and use of home dialysis modalities. The UK Renal Registry 13th Annual Report. Chapter 15. 2010:263-75.
  15. Agar JW, Knight RJ, Simmonds RE, Boddington JM, Waldron CM, Somerville CA. Nocturnal haemodialysis: an Australian cost comparison with conventional satellite haemodialysis. *Nephrology (Carlton, Vic.)* 2005;10(6):557-70.
  16. Morton RM, Tong A, Howard K, Snelling P, Webster AC. The views of patients and carers in treatment decision making for chronic kidney disease: systematic review and thematic synthesis of qualitative studies. *Br Med J* 2011;340:c112.
  17. Morton RM, Tong A, Webster AC, Snelling P, Howard K. Characteristics of dialysis important to patients and family caregivers: a mixed methods approach. *Nephrology Dialysis Transplantation* 2011;26(12):4038.
  18. Derrett S, Darmody M, Williams S, Rutherford M, Schollum J, Walker R. Older peoples' satisfaction with home-based dialysis. *Nephrology* 2010;15(4):464-70.
  19. Fadem SZ, Walker DR, Abbott G, Friedman AL, Goldman R, Sexton S, et al. Satisfaction with renal replacement therapy and education: the American Association of Kidney Patients survey. *Clin J Am Soc Nephrol* 2011;6(3):605-12.
  20. Qamar M, Bender F, Rault R, Piraino B. The United States' perspectives on home dialysis. *Adv Chronic Kidney Dis* 2009;16(3):189-97.
  21. Manns B, Johnson JA, Taub K, Mortis G, Ghali WA, Donaldson C. Quality of life in patients treated with hemodialysis or peritoneal dialysis: what are the important determinants. *Clin Nephrol* 2003;60(5):341-51.

- 1  
2  
3 22. Lee A, Gudex C, Povlsen JV, Bonnevie B, Nielsen CP. Patients' views regarding choice  
4 of dialysis modality. *Nephrology, dialysis, transplantation : official publication of the*  
5 *European Dialysis and Transplant Association - European Renal Association*  
6 2008;23(12):3953-9.  
7  
8  
9 23. Cafazzo J, Leonard K, Easty AC, Rossos PG, Chan CT. Patient-perceived barriers to the  
10 adoption of nocturnal home hemodialysis. *Clin J Am Soc Nephrol* 2009;4(4):784-9.  
11  
12 24. Cases A, Dempster M, Davies M, Gamble G. The experience of individuals with renal  
13 failure participating in home haemodialysis: an interpretative phenomenological analysis. *J*  
14 *Health Psychol* 2011;16(6):884-94.  
15  
16 25. Diaz-Buxo JA, Crawford-Bonadio TL, St Pierre D, Ingram KM. Establishing a successful  
17 home dialysis program. *Blood Purification* 2006;24(1):22-7.  
18  
19 26. Liamputtong P. *Qualitative research methods*. Melbourne: Oxford University Press,  
20 2009.  
21  
22 27. Kvale S. *Interviews*. Thousand Oaks CA: Sage Publications, 1996.  
23  
24  
25 28. Department of Health. The expert patient: a new approach to chronic disease management  
26 for the 21st century. London UK: Stationery Office: Department of Health, 2001.  
27  
28 29. Barlow J, Wright C, Sheasby J, Turner A, Hainsworth J. Self-management approaches for  
29 people with chronic conditions: a review. *Patient Educ Counsel* 2002;48:177-87.  
30  
31 30. Lorg K, Sobel DS, Steward AL, Brown BW, Bandura A, Ritter P, et al. Evidence  
32 suggesting that a chronic disease self-management program can improve health status while  
33 reducing hospitalization: a randomized trial. *Med Care* 1999;37(1):5-14.  
34  
35 31. Gerteis M. *Through the patient's eyes: Understanding and promoting patient-centered*  
36 *care*. San Francisco: Jossey-Bass Publishers, 1993.  
37  
38 32. Winkelmayr WC, Weinstein MC, Mittleman MA, Glynn RJ, Pliskin JS. Health  
39 economic evaluations: the special case of end-stage renal disease treatment. *Med Decis*  
40 *Making* 2002;22(5):417-30.  
41  
42 33. Goeree R, Manalich J, Grootendorst P, Beecroft ML, Churchill DN. Cost analysis of  
43 dialysis treatments for end-stage renal disease (ESRD). *Clin Invest Med* 1995;18(6):455-64.  
44  
45 34. Croxson BE, Ashton T. A cost effectiveness analysis of the treatment of end stage renal  
46 failure. *N Z Med J* 1990;103(888):171-4.  
47  
48  
49  
50  
51  
52  
53  
54  
55  
56  
57  
58  
59  
60

- 1  
2  
3 35. Vanholder R, Davenport A, Hannedouche T, Kooman J, Kribben A, Lameire N, et al.  
4 Reimbursement of Dialysis: A Comparison of Seven Countries. *J Am Soc Nephrol* 2012.  
5  
6  
7 36. Dor A, Pauly MV, Eichleay MA, Held PJ. End-stage renal disease and economic  
8 incentives: The international study of health care organization and financing. In: Research  
9 NBoE, editor. Cambridge, MA: National Bureau of Economic Research 2007.  
10  
11 37. Golper TA, Saxena AB, Piraino B, Teitelbaum I, Burkart J, Finkelstein FO, et al.  
12 Systematic barriers to the effective delivery of home dialysis in the United States: a report  
13 from the public policy/advocacy committee of the North American Chapter of the  
14 International Society for Peritoneal Dialysis. *American journal of kidney diseases : the*  
15 *official journal of the National Kidney Foundation* 2011;58(6):879-85.  
16  
17  
18 38. Agar JWM, Hawley CM, Kerr PG. Home hemodialysis in Australia and New Zealand:  
19 how and why it has been successful. *Sem Dial* 2011;24(6):658-63.  
20  
21  
22 39. Ludlow MJ, George CRP, Hawley C, Mathew TH, Agar JWM, Kerr PG, et al. How  
23 Australian nephrologists view home dialysis: results of a national survey. *Nephrology*  
24 2011;16:446-52.  
25  
26  
27 40. Blagg CR. Home haemodialysis: 'home, home, sweet, sweet home!'. *Nephrology*  
28 2005;10:206-14.  
29  
30  
31 41. Lynn KL, Buttimore AL. Future of home haemodialysis in Australia and New Zealand.  
32 *Nephrology* 2005;10:231-33.  
33  
34  
35  
36  
37  
38  
39  
40  
41  
42  
43  
44  
45  
46  
47  
48  
49  
50  
51  
52  
53  
54  
55  
56  
57  
58  
59  
60

**Box 1: Semi structured interview questions and topic guide**

- Brief explanation of the study and review of duration of involvement in haemodialysis-related care (to introduce and provide context)

Ask about:

- General clinician experiences of providing dialysis care:  
Which are the most important aspects of caring for a person on haemodialysis, which are the most difficult challenges encountered in caring for patients on dialysis, describe key patient problems with haemodialysis and if the clinician was in charge of their haemodialysis unit, what would they change to improve experiences of patients and/or staff
- Knowledge of home haemodialysis: what has he or she heard about home haemodialysis and is there anything else he or she would like to know about?
- Perceived benefits: Are there any benefits or advantages of home haemodialysis compared with in-centre haemodialysis (*freedom, flexibility, convenience, simplicity, effectiveness, dietary freedom, waiting at hospital for dialysis, less travel time, ability to work or socialize, more family involvement, more privacy*)?
- Perceived risks: What does the clinician see are the risks of patients doing haemodialysis at home? (*isolation, risk/safety, family burden, home modification*)?
- Facilitators: What sorts of programs or support does the clinician think would help patients consider doing home haemodialysis? (*plumbing, support, group meetings, emergency contact, clinician support*)
- Barriers: What does the clinician see are the barriers to home haemodialysis and how could these be addressed?
- Role: If home haemodialysis was offered, what does the clinician think his or her role would be? How does the clinician think his or her current roles and responsibilities will change if home haemodialysis was offered by the clinic?
- Training and support: What additional support or training would the clinician require before home haemodialysis could be offered in his or her practice?
- Attitudes: Would the clinician be supportive of offering home haemodialysis to patients in his or her clinic? Why? Does the clinician think his or her colleagues would be supportive, and why?

1  
2  
3 **Figure legend**  
4

5 Figure 1. Thematic Schema  
6  
7  
8  
9  
10  
11  
12  
13  
14  
15  
16  
17  
18  
19  
20  
21  
22  
23  
24  
25  
26  
27  
28  
29  
30  
31  
32  
33  
34  
35  
36  
37  
38  
39  
40  
41  
42  
43  
44  
45  
46  
47  
48  
49  
50  
51  
52  
53  
54  
55  
56  
57  
58  
59  
60

For peer review only

**Table 1 | Characteristics of in-centre haemodialysis service provision and reimbursement in participating countries**

| Country   | Type of providers |                    |                    | PD rate | In-clinic haemodialysis reimbursement coverage for private providers |              |                  |                |                 |           |
|-----------|-------------------|--------------------|--------------------|---------|----------------------------------------------------------------------|--------------|------------------|----------------|-----------------|-----------|
|           | Public            | Private for profit | Private non-profit |         | Basic service†                                                       | Nephrologist | Laboratory tests | Erythropoietin | Vascular access | Transport |
| France    | 28%               | 35%                | 37%                | 8%      | X                                                                    |              |                  |                |                 |           |
| Portugal  | 15%               | 85%                | ---                | 7%      | X                                                                    | X            | X                | X              | X               | X         |
| Italy     | 75%               | 25%                | ---                | 11%     | X                                                                    | X            | X                |                |                 |           |
| Germany   | 10%*              | 52%                | 38%                | 5%      | X                                                                    | X            | X                |                |                 |           |
| Sweden    | 90%               | 10%                | ---                | 22%     | X                                                                    | X            | X                | ‡              |                 |           |
| Argentina | 5%                | 95%                | ---                | 5%      | X                                                                    | X            | X                | X              | X               | X         |

\*Includes major hospitals, both public and private. †Includes the basic dialysis service, nephrology nurses and all other staff excluding nephrologist. X – Included in reimbursement coverage. ‡Included on a case-by-case clinic contract basis.

Source: Diaverum estimates based on external publications and internal market knowledge

Table 2 | Participant characteristics

| Characteristics                                            | Interviewees (n) | (%)  |
|------------------------------------------------------------|------------------|------|
| <b>Gender</b>                                              |                  |      |
| Male                                                       | 29               | (69) |
| Female                                                     | 13               | (31) |
| <b>Age</b>                                                 |                  |      |
| 20-29                                                      | 1                | (2)  |
| 30-39                                                      | 6                | (14) |
| 40-49                                                      | 17               | (41) |
| 50-59                                                      | 13               | (31) |
| 60-69                                                      | 5                | (12) |
| <b>Role</b>                                                |                  |      |
| Nephrologist                                               | 28               | (67) |
| Nurse                                                      | 14               | (33) |
| <b>Years of nephrology experience</b>                      |                  |      |
| ≤10                                                        | 6                | (14) |
| 11-20                                                      | 17               | (41) |
| 21-30                                                      | 10               | (24) |
| >30                                                        | 9                | (21) |
| <b>Location (City, Country) of primary dialysis centre</b> |                  |      |
| Marseille, France                                          | 12               | (29) |
| Arles, France                                              | 1                | (2)  |
| Bari, Italy                                                | 1                | (2)  |
| Rome, Italy                                                | 1                | (2)  |
| Potsdam, Germany                                           | 1                | (2)  |
| Buenos Aires, Argentina                                    | 1                | (2)  |
| Taranto, Italy                                             | 1                | (2)  |
| Stockholm, Sweden                                          | 1                | (2)  |
| Malmo, Sweden                                              | 1                | (2)  |
| Marsala, Italy                                             | 3                | (7)  |
| Nissoria, Italy                                            | 3                | (7)  |
| Lisbon, Portugal                                           | 16               | (38) |

Table 3 | Quotations from clinicians to illustrate each theme

| Themes                             | Quotations from participants in study                                                                                                                                                                                                                                                                                                                                                                                                                                                                                                                                                                             |
|------------------------------------|-------------------------------------------------------------------------------------------------------------------------------------------------------------------------------------------------------------------------------------------------------------------------------------------------------------------------------------------------------------------------------------------------------------------------------------------------------------------------------------------------------------------------------------------------------------------------------------------------------------------|
| <b>Structural barriers</b>         |                                                                                                                                                                                                                                                                                                                                                                                                                                                                                                                                                                                                                   |
| Ready access to in-centre dialysis | The transport is paid back by social security. It's easier for them to come to the centre. (Male nephrologist, 40s, France)                                                                                                                                                                                                                                                                                                                                                                                                                                                                                       |
|                                    | We have an in clinic environment more or less every 10 kilometres in capital cities and every 30 kilometres in rural areas... why should you buy additional equipment to comfort people to get treatment at home? ...there is just simply no need to do it at home... (Female nephrologist, 40s, Germany)                                                                                                                                                                                                                                                                                                         |
| Inadequate housing                 | We have some patients with very precarious, fragile homes, shaky homes made of wood, not strong, and not hygienic. (Male nurse, 40s, Portugal)                                                                                                                                                                                                                                                                                                                                                                                                                                                                    |
|                                    | I think it could be a problem for them to manage themselves if they have little space in their house to put the dialysis machine and especially if they are not the owner of their house... maybe the costs of the electricity or hydraulics. (Male nephrologist, 40s, Italy)                                                                                                                                                                                                                                                                                                                                     |
| Unstable economic environment      | It's very difficult to implement when you have limitations. Because you need the thing that... a lot of regions in Argentina don't have... good water. (Male nephrologist, 60s, Argentina)                                                                                                                                                                                                                                                                                                                                                                                                                        |
|                                    | For home haemodialysis in countries like Argentina, Chile, Uruguay, you have financial and economic limits. It's very expensive. The very big cost is around the machine, the dialysis machine and the water treatment. ...In Argentina ...and Brazil we re-use... the haemodialysis filters. In Chile and Uruguay and Brazil, they re-use... the blood line. (Male nephrologist, 60s, Argentina)                                                                                                                                                                                                                 |
|                                    | In my opinion today it's not a good [time]... because of the problem with the financial economic crisis. I don't know if it is more expensive but I would think so. (Male nephrologist, 40s, Portugal)                                                                                                                                                                                                                                                                                                                                                                                                            |
| <b>Centre characteristics</b>      |                                                                                                                                                                                                                                                                                                                                                                                                                                                                                                                                                                                                                   |
| Alternative treatment options      | At that time we had 15 patients on limited care, and among those, most of them did the treatment themselves. Two of them wanted to go home ...that says something...3 wanted to stay and didn't want the machine at home. (Male nephrologist, 50s, Sweden)                                                                                                                                                                                                                                                                                                                                                        |
|                                    | They started the home haemodialysis project and moved to the assisted, limited person assistance dialysis...some of them were completely autonomous, independent and they did dialysis by themselves... (Male nephrologist, 60s, Italy)                                                                                                                                                                                                                                                                                                                                                                           |
|                                    | Some patients don't want to waste time during the day so they go to the centre, after dinner, they start dialysis. Most of the time they do it themselves, and they have a nurse and a doctor nearby, and they will wake at 7 or 8 o'clock, they take a bath and they go. (Male nephrologist, 60s, Portugal)                                                                                                                                                                                                                                                                                                      |
| Competing priorities               | I think the other alternative maybe is peritoneal dialysis, which is in my opinion a better home dialysis. For the patients, it's much...easier. You can be at home by yourself doing it. I don't know if you can be at home by yourself doing home haemodialysis. (Male nephrologist, 40s, Portugal)                                                                                                                                                                                                                                                                                                             |
|                                    | They prefer to come, to the centres in Portugal, we have comfortable, good centres. (Male nephrologist, 60s, Portugal)                                                                                                                                                                                                                                                                                                                                                                                                                                                                                            |
|                                    | We had a priority to set up extended dialysis with a nightshift dialysis... because...the patients wanted that. So that's what we've basically done the last two months and that means also that half of our clinics are not - I mean right now they're more recruiting for nocturnal dialysis rather than offering them additional options with a home haemodialysis. So we had two competing programs if you may say for younger patients. One was nocturnal dialysis and one was a peritoneal dialysis program where we doubled the numbers of our patients since January. (Female nephrologist, 40s, Germany) |
| Commercial interests               | You need to have also good logistics and structure for [home haemodialysis]...you cannot just have one patient. It's very difficult to have something for very few patients so you need to have a centre or something in the region. (Male nephrologist, 50s, Sweden)                                                                                                                                                                                                                                                                                                                                             |
|                                    | I think in terms of economics it's also better because it's a little cheaper at the beginning with no staff, no transportation. We can also save money without the staff. (Female nephrologist, 50s, Portugal)                                                                                                                                                                                                                                                                                                                                                                                                    |
|                                    | If we send them to home dialysis, we miss [lose] patients from our centres. It's not the most important but it's important. Because there is an economic crisis, I don't want to see my friends, my colleagues have his contract terminated because of this [home haemodialysis] project. (Male nurse, 30s, France)                                                                                                                                                                                                                                                                                               |
|                                    | If the patient goes to home dialysis the doctor might earn less money so if he does earn more with patients in the heavy [large] centres, the doctor might tell him to go in a heavy [large] centre more than home dialysis. (Male nephrologist, 40s, France)                                                                                                                                                                                                                                                                                                                                                     |
|                                    | ...perhaps, also because there is no incentive for personnel and for the organization to permit the diffusion of this type of [home haemo] dialysis... (Male nephrologist, 40s, Italy)                                                                                                                                                                                                                                                                                                                                                                                                                            |



| Themes                                         | Quotations from participants in study                                                                                                                                                                                                                                                                                                                                                                                                                                                                                                                                                                                                                                                                                                                                                                                                                                                                                                                                                   |
|------------------------------------------------|-----------------------------------------------------------------------------------------------------------------------------------------------------------------------------------------------------------------------------------------------------------------------------------------------------------------------------------------------------------------------------------------------------------------------------------------------------------------------------------------------------------------------------------------------------------------------------------------------------------------------------------------------------------------------------------------------------------------------------------------------------------------------------------------------------------------------------------------------------------------------------------------------------------------------------------------------------------------------------------------|
|                                                | <p>So when there are no financial incentives to do home haemodialysis then people don't do it. So, people are not interested in spending €15,000 [on] the patient to set up the infrastructure...that is then only used by one patient. (Female nephrologist, 40s, Germany)</p> <p>For example, the biggest barrier to peritoneal dialysis is financial. Many doctors don't put patients on peritoneal dialysis because they think they can make money with haemo [dialysis]. (Male nephrologist, 50s, Sweden)</p>                                                                                                                                                                                                                                                                                                                                                                                                                                                                      |
| <b>Clinician responsibility and motivation</b> |                                                                                                                                                                                                                                                                                                                                                                                                                                                                                                                                                                                                                                                                                                                                                                                                                                                                                                                                                                                         |
|                                                | <p>For example, once he went to emergency unit and his wife never realised he was losing weight. He was seven kilograms overloaded, so he had 7 kilograms of water in his body and she never noticed that. So he could just have died because of this lack of follow up or whatever. (Female nurse, 30s, France)</p> <p>I don't think that security of dialysis at home is the same as in the centres. In the centres we've got a lot of protocols... They are all alone. (Male nephrologist, 30s, France)</p>                                                                                                                                                                                                                                                                                                                                                                                                                                                                          |
| Safety and security                            | <p>I think it's not a good idea because today, there is an infection risk. They are not professionals at home... (Female nurse, 20s, France)</p> <p>There is no benefit to leave the patient at home and it is too risky to, too many risks. We have experience with peritoneal dialysis, [patients] who dialyse at home...all come back, with peritonitis, with infections. (Female nurse, 20s, France)</p> <p>There is not [an] immediate link with the doctor or a nurse if you suddenly have a problem. (Male nephrologist, 50s, Italy)</p>                                                                                                                                                                                                                                                                                                                                                                                                                                         |
| Knowledge and awareness                        | <p>I've been working here for 18 years and I've never really heard about that so I think it would be quite hard to start home dialysis for patients, here it's not really policy. (Male nurse, 40s, France)</p> <p>So far there is no promotion, nobody knows about this so it would be a strategy to start in a good way and to put some new patients to home instead of in centre haemodialysis. (Male nephrologist, 60s, Italy)</p> <p>I would be really interested in hearing about the other countries and knowing really how it goes there... (Female nurse, 30s, France)</p>                                                                                                                                                                                                                                                                                                                                                                                                     |
| Lifestyle benefits                             | <p>It's a liberty for them to be treated at any time of the day, during the night, they can work and they can have other, family life, as normal as possible, that's the main benefit. He stays at home he doesn't have to travel, he can keep his job, continue, does dialysis when he has the time to do it so it can be in front of the television when he has food or whenever. (Male nephrologist, 50s, France)</p> <p>Home dialysis, it's a beautiful thing because you could dialyse when you want, during the night during the day, you are home and you have no problem, you are at your house, that's the beautiful thing, after you've finished, you could eat, you don't travel [to the centre], it's a beautiful thing. (Male nurse, 50s)</p> <p>They will feel better ...on long home haemodialysis... that is what I'm expecting. They will feel better; they will take less medication and so on, so they will be [healthier]... (Male nephrologist, 50s, Portugal)</p> |
| Professional development                       | <p>I like new experiences. I think it is good for professional growth. (Female nephrologist, 50s, Italy)</p> <p>I think it will be better for the patient and as a nurse I can do my work, my job better. (Male nurse, 40s, Portugal)</p>                                                                                                                                                                                                                                                                                                                                                                                                                                                                                                                                                                                                                                                                                                                                               |
| <b>Cultural apprehension</b>                   |                                                                                                                                                                                                                                                                                                                                                                                                                                                                                                                                                                                                                                                                                                                                                                                                                                                                                                                                                                                         |
| Unrelenting imposition                         | <p>There is one room in the house where there is the disease.... We create more problems in the relationship with the partner, who is in charge of dialysis, and sometimes the relationship becomes difficult and aggressive because of this and sometimes people can just divorce because of the dialysis problem. (Male nephrologist, 50s, France)</p> <p>He didn't want to take the hospital home, doing home dialysis, he wanted the disease to stay at the hospital and home was home, no disease at home. (Male nurse, 40s, France)</p> <p>The patient just wants to come and to have the treatment and to go home and don't think about. Some of them don't want to think to have the machine in the home. You are with your disease all the time because you have that at home, and they say sometimes they want just to have the treatment and after... OK, I forget about it and I have my life like everybody else. (Female nurse, 30s, France)</p>                          |
| Carer burden                                   | <p>They [family carers] can't be imprisoned because the father needs a person by his side in dialysis. (Female nephrologist, 40s, Portugal)</p> <p>If there [are] any problems and emergencies it's quite hard here for a nurse to take care of this, so at home, if there is no experience and the person is anxious and it's their relative it would be even harder. Because the patient could be the child the wife the husband it could be harder for them to deal with it. (Male nurse, 30s, France)</p>                                                                                                                                                                                                                                                                                                                                                                                                                                                                           |
| Attachment to professionals                    | <p>People are scared about these things, medical things that look more complicated. "I am a normal person I can't do this, I'm not able." So they are very resistant... (Male nephrologist, 60s, Italy)</p> <p>I mean if you today go to the hair cutter, you want a certain level of care right...and so we are surrounded by the experiences that whenever we get a service...we're well taken care of. (Female nephrologist, 40s,</p>                                                                                                                                                                                                                                                                                                                                                                                                                                                                                                                                                |

1  
2  
3  
4  
5  
6  
7  
8  
9  
10  
11  
12  
13  
14  
15  
16  
17  
18  
19  
20  
21  
22  
23  
24  
25  
26  
27  
28  
29  
30  
31  
32  
33  
34  
35  
36  
37  
38  
39  
40  
41  
42  
43  
44  
45  
46  
47  
48  
49  
50  
51  
52  
53  
54  
55  
56  
57  
58  
59  
60

| Themes            | Quotations from participants in study                                                                                                                                                                                                                                                                                                                                                                                |
|-------------------|----------------------------------------------------------------------------------------------------------------------------------------------------------------------------------------------------------------------------------------------------------------------------------------------------------------------------------------------------------------------------------------------------------------------|
|                   | Germany)                                                                                                                                                                                                                                                                                                                                                                                                             |
|                   | The Portuguese don't like the responsibilities. I think the majority of patients want others to care [for them]. (Female nephrologist, 40s, Portugal)                                                                                                                                                                                                                                                                |
|                   | Traditionally, everybody is linked to the doctors, everything connected with health is linked to the doctor so it's difficult for the mind set to think about home [haemodialysis], being independent from the doctor. This is a tradition. It's always a problem of mind set; it's stronger in the south [of Italy]. (Male nephrologist, 60s, Italy)                                                                |
|                   | The patients that are very afraid of everything in the dialysis room, when an alarm of the machine calls, they get very, very scared so I think that at home they will be very scared, because they would [not] feel safe... (Female nephrologist, 40s, Italy)                                                                                                                                                       |
|                   | Our people are not so educated in health. They are very afraid of taking care of their own disease. (Female nephrologist, 50s, Italy)                                                                                                                                                                                                                                                                                |
|                   | The low socio-economic level of the majority of patients - it's very difficult for them. Many people here don't know how to read... and it's very difficult for them to make the treatment. But I think the principal reason is they don't want to be responsible. (Female nephrologist, 40s, Portugal)                                                                                                              |
|                   | Maybe because of what we tell the patient when he first arrives here so we explain him all the possibilities but... might not talk about home dialysis enough. We don't give enough choice to the patient... (Female nurse, 40s, France)                                                                                                                                                                             |
| Limited awareness | We're obliged to offer them three modalities like haemodialysis, peritoneal dialysis and pre-emptive transplantation...and home haemodialysis ... is not promoted in the sense that we go actively and say, you know, you could also have home haemodialysis. If you feel that the patient is interested then someone would maybe offer it, but we're not promoting it actively. (Female nephrologist, 40s, Germany) |
|                   | I think nephrologists don't talk about it to the patients in most cases. Many patients don't know that it is a possibility. (Female nephrologist, 40s, Portugal)                                                                                                                                                                                                                                                     |
|                   | There isn't educational program for these patients; there is no promotion of home haemodialysis for patients. (Male nephrologist, 50s, Italy)                                                                                                                                                                                                                                                                        |

**Table 4 | Suggestions for overcoming clinician barriers to providing home haemodialysis**

| Barriers                                                                                    | Potential solutions                                                                                                                                                                                                                                                                                                                                                                                                                                                                                                                                                                                                                                                                                                                                                                                                                                                                                                                                                                                                                                                                                                                                                                                                                                                                                                                                                                                                                                                                                                                                                                                                                                                                                                                                                                                              |
|---------------------------------------------------------------------------------------------|------------------------------------------------------------------------------------------------------------------------------------------------------------------------------------------------------------------------------------------------------------------------------------------------------------------------------------------------------------------------------------------------------------------------------------------------------------------------------------------------------------------------------------------------------------------------------------------------------------------------------------------------------------------------------------------------------------------------------------------------------------------------------------------------------------------------------------------------------------------------------------------------------------------------------------------------------------------------------------------------------------------------------------------------------------------------------------------------------------------------------------------------------------------------------------------------------------------------------------------------------------------------------------------------------------------------------------------------------------------------------------------------------------------------------------------------------------------------------------------------------------------------------------------------------------------------------------------------------------------------------------------------------------------------------------------------------------------------------------------------------------------------------------------------------------------|
| <b>Lack of awareness and experience in home haemodialysis</b>                               | <ul style="list-style-type: none"> <li>• Convene regional and national professional education seminars on home haemodialysis</li> <li>• Incorporate home haemodialysis training in nephrology training programs</li> <li>• Develop and disseminate clinical practice guidelines on home haemodialysis</li> <li>• Organise short-term visits to other centres to gain practical experience</li> <li>• Identify local champions (professional advocates) for home haemodialysis</li> <li>• Disseminate home haemodialysis “success stories” through meetings, newsletters, nephrology society communiqués</li> <li>• Establish centralised home haemodialysis training units to conserve resources and attract training staff</li> </ul>                                                                                                                                                                                                                                                                                                                                                                                                                                                                                                                                                                                                                                                                                                                                                                                                                                                                                                                                                                                                                                                                           |
| <b>Concern about patient safety, adequacy of support, and psychosocial burden</b>           | <ul style="list-style-type: none"> <li>• Facilitate collaboration and interaction with professionals who have extensive experience with home haemodialysis</li> <li>• Develop policies addressing patient safety including 24-hour availability of technical and medical support; patient and carer training, individualised patient assessment for home visits or paid carers; patient access to a “parent dialysis centre” in case of complications; regular patient contact; dedicated psychologist/social worker</li> <li>• Ensure laboratory results can be tracked easily by patients and providers</li> <li>• Coordinate independent accreditation to ensure quality of equipment and dialysis solutions; and conducive home environment</li> <li>• Increase knowledge about the potential clinical benefits of home haemodialysis (use data of current practice to establish an evidence base to support research, which will reflect efficacy of outcomes of home programs; and encourage participation in RCTs of home dialysis versus in-centre dialysis to strengthen evidence base for home HD)</li> <li>• Educate clinicians about the availability of current “patient-friendly” home haemodialysis machines (smaller size, minimise need for a family carer to assist)</li> <li>• Demonstrate patient ability cope with home haemodialysis (self-cannulation, operating simple machines)</li> <li>• Emphasise the importance of fostering patient independence and self-care rather than a “learned helplessness”</li> <li>• Provide respite opportunities for home HD patients to avoid patient and/or carer “burn-out”</li> <li>• Promote further development of simplified home HD machines that are portable and don’t require significant plumbing or electrical changes to home</li> </ul> |
| <b>Limited centre capacity in dialysis centres to establish home haemodialysis programs</b> | <ul style="list-style-type: none"> <li>• Allocate resources and dedicated space for training</li> <li>• Provide home HD training facilities that are geographically separate from in-centre HD facilities</li> </ul>                                                                                                                                                                                                                                                                                                                                                                                                                                                                                                                                                                                                                                                                                                                                                                                                                                                                                                                                                                                                                                                                                                                                                                                                                                                                                                                                                                                                                                                                                                                                                                                             |
| <b>Inadequate compensation and financial disadvantage</b>                                   | <ul style="list-style-type: none"> <li>• Emphasise “patient-centred” care within the organisational culture to minimise influence of commercial interests (for example, to incorporate patient-orientated key performance indicators)</li> </ul>                                                                                                                                                                                                                                                                                                                                                                                                                                                                                                                                                                                                                                                                                                                                                                                                                                                                                                                                                                                                                                                                                                                                                                                                                                                                                                                                                                                                                                                                                                                                                                 |

1  
2  
3  
4  
5  
6  
7  
8  
9  
10  
11  
12  
13  
14  
15  
16  
17  
18  
19  
20  
21  
22  
23  
24  
25  
26  
27  
28  
29  
30  
31  
32  
33  
34  
35  
36  
37  
38  
39  
40  
41  
42  
43  
44  
45  
46  
47  
48  
49

| Barriers                           | Potential solutions                                                                                                                                                                                                                                                                                                                                                                                                                                                                                                                                                                                                                                                        |
|------------------------------------|----------------------------------------------------------------------------------------------------------------------------------------------------------------------------------------------------------------------------------------------------------------------------------------------------------------------------------------------------------------------------------------------------------------------------------------------------------------------------------------------------------------------------------------------------------------------------------------------------------------------------------------------------------------------------|
|                                    | <ul style="list-style-type: none"> <li>Implement centralization of funding away from commercial interests and reduce physician reimbursement on a fee-for-service model</li> <li>Compensate clinicians for “hidden tasks” including the planning and management of home haemodialysis programs</li> <li>Provide additional financial incentives to units including reimbursement at a higher than cost level</li> <li>Develop public sector funding models that rewards home haemodialysis programs (for example, provide incentive payments for home haemodialysis patients)</li> <li>Defray patients’ out of pocket expenses for home HD (water, electricity)</li> </ul> |
| <b>Competing centre priorities</b> | <ul style="list-style-type: none"> <li>Highlight the importance of equity of access to all dialysis modalities (for example, patients may prefer home haemodialysis to in-centre haemodialysis)</li> <li>Provide balanced patient education early in pre-dialysis phase emphasising all dialysis modalities available such that patients are allowed to make an informed choice.</li> </ul>                                                                                                                                                                                                                                                                                |

Peer review only

Figure 1 | Thematic Schema

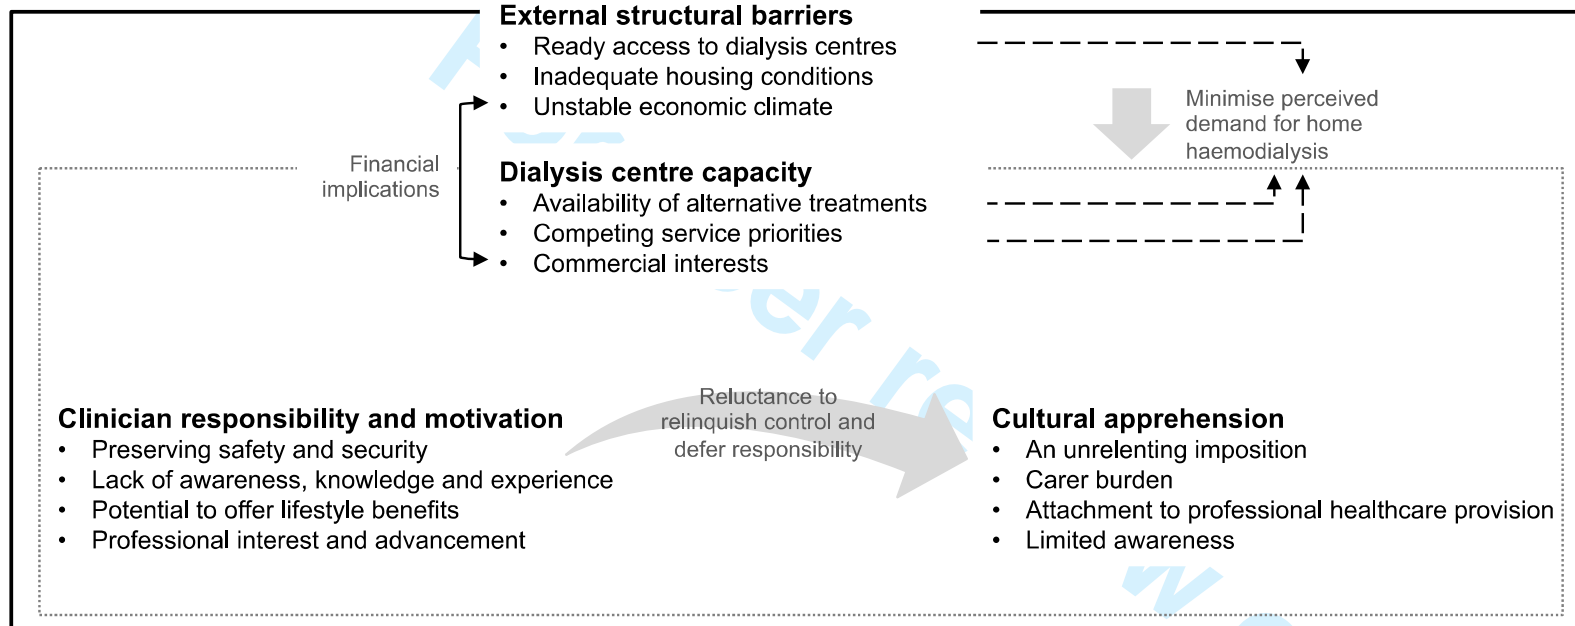



**Clinician beliefs and attitudes about home haemodialysis: A multinational interview study**

|                                 |                                                                                                                                                                                                                                                                                                                                                                                                                                                                                                                                                                                                                                                                                                                                                                                                                                                                               |
|---------------------------------|-------------------------------------------------------------------------------------------------------------------------------------------------------------------------------------------------------------------------------------------------------------------------------------------------------------------------------------------------------------------------------------------------------------------------------------------------------------------------------------------------------------------------------------------------------------------------------------------------------------------------------------------------------------------------------------------------------------------------------------------------------------------------------------------------------------------------------------------------------------------------------|
| Journal:                        | <i>BMJ Open</i>                                                                                                                                                                                                                                                                                                                                                                                                                                                                                                                                                                                                                                                                                                                                                                                                                                                               |
| Manuscript ID:                  | bmjopen-2012-002146.R1                                                                                                                                                                                                                                                                                                                                                                                                                                                                                                                                                                                                                                                                                                                                                                                                                                                        |
| Article Type:                   | Research                                                                                                                                                                                                                                                                                                                                                                                                                                                                                                                                                                                                                                                                                                                                                                                                                                                                      |
| Date Submitted by the Author:   | 04-Nov-2012                                                                                                                                                                                                                                                                                                                                                                                                                                                                                                                                                                                                                                                                                                                                                                                                                                                                   |
| Complete List of Authors:       | Tong, Allison; The University of Sydney, Sydney School of Public Health<br>Palmer, Suetonia; University of Otago, Department of Medicine<br>Manns, Braden; Faculty of Medicine, University of Calgary<br>Craig, Jonathan; University of Sydney, Sydney School of Public Health<br>Ruospo, Marinella; Diaverum Renal Services Group,, Medical Scientific Office<br>Gargano, Letizia; Diaverum Renal Services Group,, Medical Scientific Office<br>Johnson, David; University of Queensland at Princess Alexandra Hospital, School of Medicine<br>Hegbrant, Jorgen; Diaverum Renal Services Group, Diaverum Medical Office<br>Olsson, Mans; Diaverum Renal Services Group, Diaverum Medical Office<br>Fishbane, Steven; Hofstra North Shore-LIH, LIH School of Medicine<br>Strippoli, Giovanni; Consorzio Mario Negri Sud, Department of Clinical Pharmacology and Epidemiology |
| <b>Primary Subject Heading</b>: | Renal medicine                                                                                                                                                                                                                                                                                                                                                                                                                                                                                                                                                                                                                                                                                                                                                                                                                                                                |
| Secondary Subject Heading:      | Renal medicine, Qualitative research, Patient-centred medicine                                                                                                                                                                                                                                                                                                                                                                                                                                                                                                                                                                                                                                                                                                                                                                                                                |
| Keywords:                       | Dialysis < NEPHROLOGY, QUALITATIVE RESEARCH, Adult nephrology < NEPHROLOGY                                                                                                                                                                                                                                                                                                                                                                                                                                                                                                                                                                                                                                                                                                                                                                                                    |
|                                 |                                                                                                                                                                                                                                                                                                                                                                                                                                                                                                                                                                                                                                                                                                                                                                                                                                                                               |

SCHOLARONE™  
Manuscripts

## Clinician beliefs and attitudes about home haemodialysis: A multinational interview study

**Allison Tong**, The Centre for Kidney Research, The Children's Hospital at Westmead, Westmead, NSW 2145 Sydney, Australia; School of Public Health, The University of Sydney, Sydney, NSW, Australia 2006  
*Research Fellow*

**Suetonia Palmer**, Department of Medicine, University of Otago Christchurch, PO Box 4345, Christchurch, 8140, New Zealand  
*Senior Lecturer in medicine, nephrologist*

**Braden Manns**, Department of Medicine and Community Health Sciences, University of Calgary, Canada T2N 2T9  
*Associate Professor, Nephrologist*

**Jonathan C. Craig**, Centre for Kidney Research, The Children's Hospital at Westmead, NSW, Australia 2145; School of Public Health, The University of Sydney, Sydney, NSW, Australia 2006  
*Professor of epidemiology, paediatric nephrologist*

**Marinella Ruospo**, Diaverum Scientific Office, Medical-Scientific Office, Diaverum Renal Services Group, Lund, Sweden  
*Research Officer*

**Letizia Gargano**, Diaverum Scientific Office, Medical-Scientific Office, Diaverum Renal Services Group, Lund, Sweden  
*Dialysis clinical nurse specialist*

**David W. Johnson**, School of Medicine, University of Queensland at Princess Alexandra Hospital, Brisbane, Queensland, Australia 4102  
*Professor of nephrology*

**Jörgen Hegbrant**,  
Diaverum Medical Office, Diaverum Renal Services Group, Lund, Sweden  
*Chief Medical Officer, nephrologist*

**Måns Olsson**, Diaverum Renal Services Group, Lund, Sweden  
*Head of business development*

**Steven Fishbane**, Hofstra North Shore-LIH School of Medicine, Great Neck NY  
*Chief of Nephrology*

**Giovanni F.M. Strippoli**, Department of Clinical Pharmacology and Epidemiology, Consorzio Mario Negri Sud, Via Nazionale 8/a, 66030, S. Maria Imbaro, Italy; Diaverum Scientific Office, Lund, Sweden; School of Public Health, University of Sydney, Australia, Department of Emergency and Organ Transplantation, University of Bari, Italy  
*Associate Professor of Nephrology*

**Correspondence to:** Giovanni Strippoli, p: +39 3358 756 828 e: [gfmstrippoli@gmail.com](mailto:gfmstrippoli@gmail.com)  
**Word count:** 3601

## Abstract

**Objectives:** To explore clinician beliefs and attitudes about home haemodialysis in global regions where the prevalence of home haemodialysis is low, and to identify barriers to developing home haemodialysis services and possible strategies to increase acceptance and uptake of home haemodialysis.

**Design:** Semi-structured interviews, thematic analysis

**Setting:** 15 dialysis centres in Italy, Portugal, France, Germany, Sweden and Argentina

**Participants:** 28 nephrologists and 14 nurses caring for patients receiving in-centre haemodialysis

**Results:** We identified four major themes as being central to clinician beliefs about home haemodialysis in regions without established services: external structural barriers (ready access to dialysis centres, inadequate housing conditions, unstable economic environment); dialysis centre characteristics (availability of alternative treatments, competing service priorities, commercial interests); clinician responsibility and motivation (preserving safety and security, lack of awareness, knowledge and experience, potential to offer lifestyle benefits, professional interest and advancement); and cultural apprehension (an unrelenting imposition, carer burden, attachment to professional healthcare provision, limited awareness).

**Conclusions:** Despite recognising the potential benefits of home haemodialysis, clinicians practising in Europe and South America felt apprehensive and doubted the feasibility of home haemodialysis programs. Programs that provide clinicians with direct experience of home haemodialysis could increase acceptance and motivation for home-based haemodialysis, as might service prioritisation and funding models that favour home haemodialysis.



1  
2 **Article summary**  
3  
4  
5  
6

7 **Article focus:**  
8

- 9  
10  
11  
12  
13  
14  
15  
16  
17  
18
- To elicit clinician beliefs and attitudes about home haemodialysis in global regions where the prevalence of home haemodialysis is low.
  - To identify barriers to developing home haemodialysis services and possible strategies to increase acceptance and uptake of home haemodialysis.

19 **Key messages:**  
20

- 21  
22  
23  
24  
25  
26  
27  
28  
29  
30  
31  
32  
33  
34  
35  
36
- Nephrologists and dialysis nurses in regions where home haemodialysis is not established recognise the potential benefits but are pessimistic about the feasibility of developing such programs
  - Direct clinician experience and education as well as improved reimbursement for home haemodialysis may assist the establishment of home haemodialysis services
  - Clinicians express concern about the quality and safety of home haemodialysis, which may be addressed by increased experience of home dialysis care

37 **Strengths and limitations of this study:**  
38

- 39  
40  
41  
42  
43  
44  
45  
46  
47  
48  
49  
50  
51  
52  
53  
54  
55  
56  
57  
58  
59  
60
- We actively sought a broad range of views and experiences through purposive sampling.
  - Our study included only clinicians within a large dialysis service provider in Europe and South America.

## Introduction

Approximately 2 million people worldwide receive chronic dialysis treatment for end-stage kidney disease with annual direct healthcare costs that exceed USD 60 billion.<sup>1</sup> The global dialysis population is expanding rapidly in the context of constrained workforce and financial resources. In the last decade the haemodialysis populations in China, India, and Brazil increased 15% each year<sup>2</sup> and in Australia the dialysis population nearly doubled.<sup>3</sup> People who require dialysis treatment experience severely impaired quality of life and role function and have a markedly increased risk of mortality compared to the general population.

Approximately 10% to 20% of people on in-centre haemodialysis die each year and only about 10% are employed.<sup>4</sup> In contrast to in-centre dialysis, people on home haemodialysis may experience a life-expectancy approaching that of a deceased donor kidney transplant recipient.<sup>5</sup> When analyses are controlled for comorbidity, home haemodialysis is associated with better outcomes than in-centre haemodialysis for most measures of effectiveness.<sup>5,6</sup>

Although home haemodialysis is consistently associated with markedly improved quality of life and patient rehabilitation, the prevalence of home haemodialysis as a proportion of all dialysis care varies nearly 100-fold globally. Home haemodialysis is common in New Zealand and Australia (20% of all dialysis patients) but is rare or unavailable in parts of Europe and Scandinavia, the United States, and South America.<sup>7</sup> The reasons for the wide variation in uptake are unclear, although higher home haemodialysis use is characterised by local advocacy and experience combined with service centralisation and favourable reimbursement.<sup>8,9</sup> When patients are educated about home dialysis therapies, about one-half choose self-care dialysis<sup>10</sup> and National Institute for Clinical Excellence (NICE) guidelines recommend that all suitable patients should be offered the choice between home haemodialysis and in-centre haemodialysis in a hospital or satellite clinic.<sup>11</sup>

1  
2  
3  
4 Clinicians are critical to the effective implementation of home haemodialysis services<sup>12 13</sup> to  
5  
6 improve patient choice and facilitate increased dialysis service capacity in response to  
7  
8 expanding patient populations.<sup>14</sup> To date there is little published research describing the  
9  
10 attitudes of clinicians toward home haemodialysis in areas where home haemodialysis is rare  
11  
12 or non-existent. In view of the absence of home haemodialysis programmes in some areas  
13  
14 within Europe, Scandinavia, and South America, the aim of this study was to explore the  
15  
16 perceptions of home haemodialysis from nephrologists and dialysis nurses in these regions.  
17  
18  
19  
20

## 21 **Methods**

22  
23  
24  
25  
26 We invited practicing nephrologists and dialysis nurses from Europe and South America  
27  
28 (France, Germany, Italy, Portugal, Sweden, and Argentina) involved in the care of patients on  
29  
30 chronic haemodialysis in facilities that do not currently provide home haemodialysis services.  
31  
32 We used purposive sampling to select both male and female clinicians from a several  
33  
34 geographical areas in Europe and South America and with diverse clinical experience of  
35  
36 haemodialysis to ensure a broad range of views and experiences of haemodialysis provision.  
37  
38 All participants were recruited from centres within Diaverum, a large dialysis service  
39  
40 provider. Details of dialysis services provision and reimbursement in the participating  
41  
42 countries are provided in **Table 1**. In all contributing countries, access to dialysis services is  
43  
44 universal, but the percentage of private providers and reimbursement models varies to a great  
45  
46 extent. Ethics approval was provided by all participating centres.  
47  
48  
49  
50

51  
52  
53 To elicit clinician beliefs and experiences, we developed a semi-structured interview guide  
54  
55 based on a literature review on home haemodialysis (any haemodialysis at home including  
56  
57 thrice weekly dialysis or frequent haemodialysis performed during the day or night)<sup>15-24</sup> and  
58  
59 discussions between the research team (**Box 1**). The interviews focused on knowledge of  
60

1 home haemodialysis, perceived benefits and risks, potential facilitators and barriers to home  
2 haemodialysis, training and support needs of clinicians, and clinical attitudes toward home  
3 haemodialysis. One author (AT) conducted one face-to-face semi-structured qualitative  
4 haemodialysis. One author (AT) conducted one face-to-face semi-structured qualitative  
5 interview with each participant in their office or hospital meeting room. An interpreter was  
6 present during interviews with non-English speaking participants (n=20). We ceased  
7 recruitment when theoretical saturation was reached. We recorded contextual details after  
8 each interview. We digitally audio-recorded and transcribed verbatim all interviews in full.  
9

10 We entered transcripts into a software package for storing, coding and searching qualitative  
11 data (HyperRESEARCH Version 3.0.2., ResearchWare, Inc., 2011  
12 [<http://www.research.com>]). Drawing on grounded theory and thematic analysis,<sup>25 26</sup> one  
13 author (AT) coded the transcripts and recorded concepts inductively, grouped similar  
14 concepts, and identified patterns and relationships in the data. AT discussed the preliminary  
15 coding scheme with MR who had independently reviewed the transcripts. The coding structure  
16 was refined until we captured all concepts relating to the perspectives of clinician beliefs and  
17 attitudes about home haemodialysis. To enhance the analytical framework and potential for  
18 offering meaningful insight, interpretation of the data and preliminary themes was discussed  
19 by the research team.  
20  
21  
22  
23  
24  
25  
26  
27  
28  
29  
30  
31  
32  
33  
34  
35  
36  
37  
38  
39  
40  
41  
42

## 43 **Results**

44 We interviewed 42 of 43 invited clinicians (98%) in October and November 2011. One could  
45 not participate because of clinical commitments. Each interview lasted between 25 to 50  
46 minutes. Most participants were nephrologists (n=28), were from Portugal (n=16) or France  
47 (n=13) and were men (n=29) (**Table 1**). The clinicians had between 4 and 28 years of  
48 nephrology experience and ten had previous experience in home haemodialysis.  
49  
50  
51  
52  
53  
54  
55  
56  
57  
58  
59  
60

1 In our analytical framework we identified four themes that were central to clinician beliefs  
2 and attitudes towards home haemodialysis: structural barriers (ready access to existing  
3 treatment, inadequate housing, unstable economic environment), dialysis centre  
4 characteristics (alternative treatment options, competing service priorities, commercial  
5 interests), clinician responsibility and motivation (safety and security, knowledge and  
6 awareness, lifestyle benefits, professional development), and cultural apprehension  
7 (unrelenting imposition, carer burden, attachment to professionals, limited awareness)  
8 (Figure 1). Table 2 provides a selection of quotes from the clinicians to illustrate each theme.  
9  
10  
11  
12  
13  
14  
15  
16  
17  
18  
19  
20

### 21 **Structural barriers**

22  
23  
24  
25  
26 The theme of structural barriers encompassed views on the physical and financial barriers to  
27 home haemodialysis that were believed reduce the motivation and capacity of providers to  
28 offer home haemodialysis programs. Access to dialysis centres related to the close proximity  
29 of most patients to existing dialysis services that clinicians thought reduced the need for  
30 home-based care. Housing conditions emphasised the concerns of clinicians that  
31 accommodation and utilities were frequently inadequate to support home haemodialysis. The  
32 economic environment described the widespread anxiety felt by clinicians that dialysis  
33 providers and patients could not afford new home haemodialysis initiatives, particularly in  
34 the current financial climate.  
35  
36  
37  
38  
39  
40  
41  
42  
43  
44  
45  
46  
47

48 *Ready access to dialysis centres*—Almost all clinicians perceived that ready access to  
49 existing dialysis clinics and patient transport reimbursement reduced the need for home  
50 haemodialysis and, because of this, acquisition of capital equipment for home haemodialysis  
51 might be unjustified.  
52  
53  
54  
55  
56  
57  
58  
59  
60

1  
2  
3  
4  
5  
6  
7  
8  
9  
10  
11  
12  
13  
14  
15  
16  
17  
18  
19  
20  
21  
22  
23  
24  
25  
26  
27  
28  
29  
30  
31  
32  
33  
34  
35  
36  
37  
38  
39  
40  
41  
42  
43  
44  
45  
46  
47  
48  
49  
50  
51  
52  
53  
54  
55  
56  
57  
58  
59  
60

*Inadequate housing conditions*—Clinicians considered that home haemodialysis was impossible for patients with small houses or inadequate hygiene. However, when prompted, many participants acknowledged they were not familiar with the smaller size of haemodialysis machines designed for home use. Clinicians mentioned that some patients could not access clean water or did not own their homes and were therefore were not permitted to make necessary plumbing or electrical modifications.

*Unstable economic environment*—Clinicians believed that the feasibility of establishing home haemodialysis programs is determined by dedicated government funding which was unlikely in the present economic climate. Most clinicians were employed by dialysis providers in European countries in financial crisis which, together with government health budget cuts, were perceived as significant barriers to developing home haemodialysis services, particularly as they felt the financial risks of such programs were uncertain.

### **Dialysis centre characteristics**

The theme centre capacity described the features of dialysis centre practice that quell demand for home haemodialysis. Alternative treatment options referred to clinic centres offering home-based peritoneal dialysis and self-care haemodialysis services in preference to home haemodialysis to offer patients more flexibility and autonomy. Competing priorities related to the need for dialysis centres to focus on specific dialysis programs often at the expense of home haemodialysis initiatives because of limited resources and reimbursement policies. Commercial interests described clinician anxiety over the lack of centralised reimbursement for home haemodialysis; most felt that increased uptake of home haemodialysis would reduce dialysis provider income and, as a consequence, impact clinician job security.

1  
2  
3  
4  
5  
6  
7  
8  
9  
10  
11  
12  
13  
14  
15  
16  
17  
18  
19  
20  
21  
22  
23  
24  
25  
26  
27  
28  
29  
30  
31  
32  
33  
34  
35  
36  
37  
38  
39  
40  
41  
42  
43  
44  
45  
46  
47  
48  
49  
50  
51  
52  
53  
54  
55  
56  
57  
58  
59  
60

*Availability of alternative treatments*—Clinicians believed that alternative programs offered by dialysis clinics weakened the demand for home haemodialysis programs. Such treatment options, which improve patient autonomy at lower cost, include in-centre self or limited care haemodialysis, in-centre nocturnal haemodialysis, and home peritoneal dialysis.

*Competing service priorities*—All clinicians believed that dialysis centres should deliver high quality care and endeavour to maximise patient satisfaction. Some felt that their centre had insufficient staff and centre facilities to support home haemodialysis training and sustain home haemodialysis programmes. In addition, some centres were focused on establishing and maintaining other newer treatment programs including in-centre nocturnal haemodialysis as well as home peritoneal dialysis and, accordingly, could not diversify further resources into home haemodialysis programs. Some clinicians suggested that centres which had reached maximum capacity could consider offering home haemodialysis.

*Commercial interests*—Some clinicians acknowledged that dialysis in their regions is an “industry.” They speculated that centres would incur an overall financial loss if home haemodialysis was offered. Some were anxious that their centre would lose patients and income if home haemodialysis was offered, and staff might be made redundant as a result. Clinicians believed dialysis providers would not invest in new infrastructure for home haemodialysis programs if the capital and service-related expenses were not reimbursed by government at the levels currently provided for in-centre haemodialysis. Clinicians believed centres needed to be sufficiently incentivised by health systems to provide home haemodialysis at rates comparable to in-centre haemodialysis before home haemodialysis could be commenced in their centres.

### **Clinician responsibility and motivation**

1  
2  
3  
4  
5  
6  
7  
8  
9  
10  
11  
12  
13  
14  
15  
16  
17  
18  
19  
20  
21  
22  
23  
24  
25  
26  
27  
28  
29  
30  
31  
32  
33  
34  
35  
36  
37  
38  
39  
40  
41  
42  
43  
44  
45  
46  
47  
48  
49  
50  
51  
52  
53  
54  
55  
56  
57  
58  
59  
60

The theme clinician responsibility and motivation described the ways in which the clinicians view their roles in dialysis care. Participants believed that home haemodialysis is beneficial for patients, but while they are interested in the idea, they are reluctant to relinquish control and defer responsibilities of medical care to patients and their carers. Preserving quality and safety referred to the need by clinicians to be directly involved in dialysis processes to ensure their patients were safe on treatment. Lack of awareness, knowledge, and experience reflected the clinician's own anxieties that they are less knowledgeable in home haemodialysis but retain a desire to learn more about home haemodialysis. Potential to offer lifestyle benefits encompassed the understanding of clinicians that home haemodialysis provides patients with considerable autonomy and self-reliance that can improve their own functioning and quality of life. Professional interest and advancement described the interest clinicians have in learning more about home haemodialysis to increase their own professional skills.

*Preserving safety and security*—Clinicians frequently identified quality and safety as key healthcare priorities within their practice and anticipated that home haemodialysis would diminish their capacity to protect the well-being of their patients. They voiced concern that patient monitoring would be less with home haemodialysis and that patients may not adhere to their prescribed regimens. Also, they believed patients and carers would not safely manage complications such as infections or cardiovascular events. Dialysis was perceived to require medical and technical expertise. Clinicians believed that most patients were too old, dependent, sick, or did not have a suitable carer to have haemodialysis safely at home. Respondents felt that some patients were unable to maintain proper hygiene standards, or understand the technical requirements of haemodialysis due to low socioeconomic and education levels.



1  
2  
3  
4  
5  
6  
7  
8  
9  
10  
11  
12  
13  
14  
15  
16  
17  
18  
19  
20  
21  
22  
23  
24  
25  
26  
27  
28  
29  
30  
31  
32  
33  
34  
35  
36  
37  
38  
39  
40  
41  
42  
43  
44  
45  
46  
47  
48  
49  
50  
51  
52  
53  
54  
55  
56  
57  
58  
59  
60

*Lack of awareness, knowledge and experience*—Many clinicians acknowledged that they lacked sufficient knowledge and awareness about home haemodialysis to be confident about it as a treatment option and suggested they needed more information. For example, they suggested that learning about the experiences of home haemodialysis from colleagues and patients in other regions with established programmes would increase the potential for development of home haemodialysis services in their own centres.

*Potential to offer lifestyle benefits*—Clinicians identified numerous benefits of home haemodialysis, which they perceived were predominantly related to patient empowerment and lifestyle, including autonomy, flexibility, comfort and privacy, ability to work, freedom, and increased time. Many believed that home haemodialysis was good particularly for young employed patients and a few suggested that longer dialysis sessions would improve clinical parameters and reduce the need for medications.

*Professional interest and advancement*—Some participants, both nephrologists and nurses, were interested and enthusiastic about offering home haemodialysis, particularly if they believed it would benefit patients. For some, home haemodialysis is a “new” technique which would enable them to acquire additional professional skills and experiences and be better clinicians.

### **Cultural apprehension**

The theme cultural apprehension described the concerns that clinicians have about the disruption to families caused by home haemodialysis and burden of medical responsibility placed on unwilling patients and their carers by home based care. The clinicians emphasised that most patients have close family networks and would be unwilling to encumber family members with the “burden” of dialysis. They believed that patients highly value and depend

1 on professional medical care within a clinic setting, and if severed, this might cause distress.  
2  
3 Unrelenting imposition encompassed the clinicians' beliefs that patients would prefer to keep  
4 dialysis away from the home environment and their family and friends. Carer burden  
5  
6 reflected the concern that clinicians hold for the ability of carers to cope with the long term  
7  
8 responsibility for home haemodialysis. Attachments to professional healthcare provision  
9  
10 highlighted the belief held by clinicians that patients desire the security, support, and safety  
11  
12 of in-centre care.  
13  
14  
15  
16  
17

18  
19 *An unrelenting imposition*—Almost all clinicians were convinced that many patients would  
20  
21 be resistant to home haemodialysis and averse to bringing the disease home. Clinicians  
22  
23 believed patients did not want dialysis to disrupt their normality and impinge on everyday  
24  
25 lives. They predicted patients might not wish to have a haemodialysis machine at home as it  
26  
27 would serve as a constant reminder of their disease. Clinicians spoke of home haemodialysis  
28  
29 as being confronting for family and friends and that patients would be unwilling to impose an  
30  
31 unnecessary burden on their families.  
32  
33  
34  
35  
36

37 *Carer burden*—Some clinicians were apprehensive that home haemodialysis would be an  
38  
39 overwhelming burden on family carers. They believed family members were not able  
40  
41 perform dialysis, monitor the patient's health status, and manage complications. Clinicians  
42  
43 felt that carers might experience considerable pressure, stress and anxiety.  
44  
45  
46  
47

48 *Attachments to professional healthcare provision*—Clinicians believed that patients relied on  
49  
50 doctors for health-related issues and felt safer receiving care in a medical unit. At a  
51  
52 community level, health education and promotion of self-management for chronic diseases  
53  
54 was generally lacking in the participating regions. Many clinicians anticipated that patients  
55  
56 would feel apprehensive and refuse to “cut the umbilical cord with the clinic”. They  
57  
58 perceived that home based care might disconnect patients from social support of staff and  
59  
60

1 other patients, impair access to clinicians, and reduce safety. Clinicians felt that separation  
2  
3 from in-centre care would be particularly difficult for patients with a longer previous  
4  
5 experience of in-centre haemodialysis care. They believed patients would be anxious about  
6  
7 taking responsibility for complicated and technical medical tasks.  
8  
9

10  
11  
12 *Limited awareness*—The participants acknowledged that treatment choices made by patients  
13  
14 are shaped by the way doctors present treatment options, which was almost always an “active  
15  
16 promotion” of in-centre haemodialysis. They believed that patients generally trust and  
17  
18 willingly accept treatment recommendations without hesitation. Home haemodialysis was  
19  
20 rarely discussed in clinic consultations and many patients were not aware that home  
21  
22 haemodialysis might be a treatment choice.  
23  
24

## 25 26 27 28 **Discussion**

29  
30  
31  
32 The four themes encompassing clinician beliefs and perceptions of home haemodialysis in  
33  
34 regions without established services (external structural barriers, centre capacity, clinician  
35  
36 responsibility and motivation, and cultural apprehension) are useful when considering  
37  
38 strategies to increase acceptance and uptake of home haemodialysis. Clinicians generally  
39  
40 recognise the benefits of home haemodialysis for patients including increased empowerment,  
41  
42 autonomy, and flexibility; however, they are apprehensive about providing home  
43  
44 haemodialysis services and doubt the feasibility of such programs within their regions.  
45  
46  
47 Clinicians perceive that patient proximity to dialysis centres and readily available alternative  
48  
49 dialysis modalities negate patient demand for home haemodialysis. Barriers to the  
50  
51 establishment of home haemodialysis services included reimbursement rates for in-centre  
52  
53 haemodialysis, cultural expectations of the clinician’s role in medical care, as well as a strong  
54  
55 perception that home haemodialysis could be an unrelenting, overwhelming and unwarranted  
56  
57 burden on their families. Clinicians suggested that their own direct experience of home  
58  
59  
60

1 haemodialysis could provide confidence in home haemodialysis which, combined with their  
2  
3  
4 own existing professional interest in providing a broad range of treatment options to patients  
5  
6 and families, would increase their motivation to advocate for home haemodialysis services.  
7  
8  
9

10 Research on treatment choices when approaching the need for dialysis suggests that when  
11  
12 patients are fully informed about dialysis modality options, about half choose self-care  
13  
14 dialysis (peritoneal dialysis or haemodialysis) and another 15% choose limited-care clinic-  
15  
16 based haemodialysis.<sup>10</sup> Evidence also indicates that what a clinician believes about patient  
17  
18 survival, treatment effectiveness and quality of life for each dialysis modality strongly  
19  
20 influences the uptake of home haemodialysis. Conversely, limited training or experience in  
21  
22 home therapies reduces clinician confidence in home-based care.<sup>13</sup> A dialysis centre  
23  
24 “champion” for home haemodialysis is considered pivotal to increasing and sustaining home-  
25  
26 based dialysis services.<sup>13</sup> These data suggest that increasing clinician’s knowledge and  
27  
28 experience of home haemodialysis in areas without home dialysis services could facilitate the  
29  
30 development of home haemodialysis and, in doing so, broaden dialysis treatment choices for  
31  
32 patients.  
33  
34  
35  
36  
37  
38

39 Increased patient responsibility and control over the management of chronic diseases reduces  
40  
41 symptom severity and improves both patient confidence and clinical outcomes.<sup>27-29</sup>  
42

43 Although home haemodialysis fulfils many tenets of patient-centred care ideology<sup>27 30</sup> and,  
44  
45 accordingly, has the potential to improve outcomes for people who have end-stage kidney  
46  
47 disease, it is apparent that shifting the responsibility for chronic illness management of end-  
48  
49 stage kidney disease toward patients and carers is confronting for clinicians who are  
50  
51 unfamiliar with and inexperienced in home haemodialysis. This perception is potentially in  
52  
53 conflict with the views expressed by patients and carers with experience of earlier stages of  
54  
55 chronic kidney disease not requiring dialysis for whom treatment choices are prioritised by  
56  
57 maximising quality of life.<sup>15</sup>  
58  
59  
60

1  
2  
3  
4 Financial reimbursement for home haemodialysis is a central concern for the interviewed  
5  
6 clinicians. Central reimbursement and regulations governing funding for long-term dialysis  
7  
8 vary considerably across healthcare jurisdictions and may be responsible in part for variable  
9  
10 implementation of home haemodialysis services. Although home haemodialysis is markedly  
11  
12 cheaper than in-centre care,<sup>31-33</sup> few health systems differentiate between dialysis modalities  
13  
14 in funding models.<sup>34</sup> In The Netherlands and some states in Australia, home haemodialysis is  
15  
16 incentivised with a higher reimbursement rate than for in-centre haemodialysis, and in the  
17  
18 United Kingdom and Ontario, Canada, reimbursement of home haemodialysis is similar to  
19  
20 in-centre care but reimbursement includes funding for longer hours or extended frequency  
21  
22 dialysis at home. The Belgian health system provides a bonus if a certain number of patients  
23  
24 in a facility perform self-care or home haemodialysis, peritoneal dialysis or transplantation,<sup>34</sup>  
25  
26 while in New Zealand, regional authorities are given overall budgets for renal services,  
27  
28 effectively encouraging home therapies through the incentive for providers to lower overall  
29  
30 costs of care.<sup>35</sup> Funding models that incentivise home haemodialysis in areas of low uptake  
31  
32 would similarly reduce costs to health systems as a whole and directly motivate clinicians  
33  
34 and providers to prioritise new home dialysis programmes.  
35  
36  
37  
38  
39  
40  
41

42 Our study included only clinicians within a large dialysis service provider in Europe and  
43  
44 South America. While the study included a broad range of perspectives, the findings may not  
45  
46 be generalisable to other countries or health provider settings. However, the findings  
47  
48 resonate with barriers to home haemodialysis identified by other studies.<sup>22,36</sup> In common with  
49  
50 other qualitative studies, we cannot assume our findings are representative of the whole  
51  
52 clinician population, although we actively sought a broad range of views and experiences  
53  
54 through purposive sampling. We did not seek participant feedback on the transcripts or  
55  
56 preliminary findings given the challenges of the different languages included. However, we  
57  
58 used investigator triangulation where AT/MR debriefed after each interview, and reviewed  
59  
60

1 the transcripts independently to ensure the thematic analysis encompassed the full range of  
2 participants' perspectives. For interviews with non-English participants, some cultural or  
3 linguistic nuances may not have been captured; however, the concepts and themes we  
4 identified were comparable to those that arose from interviews with English-speaking  
5 participants.  
6  
7  
8  
9  
10  
11

12  
13  
14  
15 Inequalities in global access to home haemodialysis exist within many health systems. A  
16 better understanding of the barriers to home haemodialysis that are relevant to specific health  
17 systems and regions is critical to overcoming them. Using our thematic framework together  
18 with published international experience<sup>36-40</sup> we suggest strategies to foster uptake of home  
19 haemodialysis (**Table 4**). Clinician enthusiasm for a dialysis modality is a key determinant of  
20 the proportion of patients that are treated with that modality<sup>11</sup>; as such, addressing clinician  
21 attitudinal, knowledge and experience barriers may increase acceptance and motivation to  
22 establish home haemodialysis programs. We suggest increasing clinician competence and  
23 familiarity with home haemodialysis is a necessary component of expanding home  
24 haemodialysis care in regions without existing services. Professional education and training  
25 for clinicians could involve interactive seminars with healthcare providers who have  
26 experience in home haemodialysis, visits to other centres to gain hands-on clinical experience  
27 in home haemodialysis,<sup>36</sup> and the support of a "local champion" for home haemodialysis.<sup>11</sup>  
28 Clinicians frequently voice concerns about patient safety suggesting that specific strategies  
29 are needed to minimise potential risks for clinicians and patients in home haemodialysis  
30 programs. These might include 24-hour access to a home haemodialysis clinician, increased  
31 patient and physician education and training, and specific carer support. More work is needed  
32 to determine fully patients' and clinicians' views on the design and delivery of such services.  
33  
34  
35  
36  
37  
38  
39  
40  
41  
42  
43  
44  
45  
46  
47  
48  
49  
50  
51  
52  
53  
54  
55  
56  
57  
58  
59  
60

The observational nature of the existing evidence for home haemodialysis together with the  
concerns that clinicians raise over the safety and durability of home haemodialysis support

1 the need for a randomised trial evaluating the effectiveness and safety of home  
2  
3 haemodialysis. In addition, research could evaluate the effectiveness of targeted interventions  
4  
5 or strategies to overcome the identified barriers to home haemodialysis (such as small-scale  
6  
7 implementation of home haemodialysis in selected centres, patient-friendly technology,  
8  
9 improved reimbursement, and clinician education programmes) to increase the uptake of  
10  
11 home haemodialysis.  
12  
13

14  
15  
16  
17 This analysis suggests potential barriers to the development of home haemodialysis  
18  
19 programmes specific to regions without active home haemodialysis services that include  
20  
21 structural barriers, competing treatment choices and services, the role of the clinician in care,  
22  
23 and cultural perspectives within health delivery. Specific strategies to address these issues  
24  
25 may increase access to home haemodialysis in some global regions.  
26  
27  
28  
29  
30  
31  
32  
33  
34  
35  
36  
37  
38  
39  
40  
41  
42  
43  
44  
45  
46  
47  
48  
49  
50  
51  
52  
53  
54  
55  
56  
57  
58  
59  
60

## Acknowledgements

We would like to thank all the clinicians who volunteered their time to participate in this study.

## Copyright/licence for publication

The Corresponding Author has the right to grant on behalf of all authors and does grant on behalf of all authors, a worldwide licence to the Publishers and its licensees in perpetuity, in all forms, formats and media (whether known now or created in the future), to i) publish, reproduce, distribute, display and store the Contribution, ii) translate the Contribution into other languages, create adaptations, reprints, include within collections and create summaries, extracts and/or, abstracts of the Contribution, iii) create any other derivative work(s) based on the Contribution, iv) to exploit all subsidiary rights in the Contribution, v) the inclusion of electronic links from the Contribution to third party material where-ever it may be located; and, vi) licence any third party to do any or all of the above.

## Declaration of competing interests

All authors have completed the Unified Competing Interest form at [www.icmje.org/coi\\_disclosure.pdf](http://www.icmje.org/coi_disclosure.pdf) (available on request from the corresponding author) and declare: the study has been part-funded by an unrestricted grant from Diaverum AB, a global provider of renal services. The study sponsor commissioned the work to an independent steering committee and had no role in study design; collection, analysis, and interpretation of data; writing the report; and the decision to submit the report for publication; AT is supported by the National Health and Medical Research Council Early Career Fellowship ID 1037162; SP is supported in part by an unrestricted grant from Amgen Dompé administered by the Mario Negri Sud Consortium, Italy; DJ has received research grants, travel sponsorships and consultancy fees from Baxter Healthcare and Fresenius Medical Care and is a current



1 recipient of a Queensland Government Health Research Fellowship. JH is Chief Medical  
2  
3 Officer at Diaverum AB, a global provider of renal services; GFMS is Senior Vice President  
4  
5 scientific affairs at Diaverum AB, a global provider of renal services: no other relationships  
6  
7 or activities that could appear to have influenced the submitted work.  
8  
9

### 10 11 12 13 **Details of contributors**

14 All authors, external and internal, had full access to all of the data in the study and can take  
15  
16 responsibility for the integrity of the data and the accuracy of the data analysis.  
17  
18

### 19 20 21 22 **Contributions**

23 AT participated in the design of the study, did the interviews, transcribed the interviews,  
24  
25 carried out the thematic analysis and drafted the manuscript. SP designed the study,  
26  
27 participated in the thematic analysis and critical review of the first and subsequent manuscript  
28  
29 drafts. BM and JC provided intellectual input into first and subsequent manuscript drafts and  
30  
31 assisted with thematic analysis. MR, LG, JH and MO assisted with interviews and provided  
32  
33 intellectual input into subsequent manuscript drafts. DWJ assisted with thematic analysis and  
34  
35 provided intellectual input into primary and subsequent drafts. JH and MO provided  
36  
37 intellectual input into subsequent manuscript drafts. GS conceived the study, obtained  
38  
39 funding, assisted with study design and thematic analysis, provided intellectual input into  
40  
41 subsequent manuscript drafts and is the guarantor. All authors made substantial contributions  
42  
43 to conception and design, acquisition of data, or analysis and interpretation of data; drafting  
44  
45 the article or revising it critically for important intellectual content; and provided final  
46  
47 approval of the version to be published.  
48  
49  
50  
51

### 52 53 54 55 **Ethics approval**

56  
57  
58  
59  
60  
Ethics approval was obtained for the study as follows:

1  
2 -for participants from France we received ethic approval from Comité de Protection des  
3  
4 Personnes Sud-Méditerranée II, 2011-AO1044-37  
5  
6 -for participants from Diaverum (Portugal, Sweden, Germany, Argentina) we received ethic  
7  
8 approval from Comissão de Ética da Diaverum, aprovação n. 01/2011  
9  
10 -for Italy we informed ethics committees according to Italian law (Italian  
11  
12 Republic. Determination of the Italian Medicines Agency of March 20, 2008 [in  
13  
14 Italian]. *Official Gazette of the Italian Republic*. General Series No. 76; March 31, 2008).  
15  
16 For Argentina there was no requirement for ethics submissions for this type of study.  
17  
18 All participants provided written voluntary informed consent.  
19  
20  
21  
22  
23

#### 24 **Data sharing**

25  
26 No additional data are available.  
27  
28  
29  
30  
31  
32  
33  
34  
35  
36  
37  
38  
39  
40  
41  
42  
43  
44  
45  
46  
47  
48  
49  
50  
51  
52  
53  
54  
55  
56  
57  
58  
59  
60

## References

1. Atkins RC. The changing patterns of chronic kidney disease: The need to develop strategies for prevention relevant to different regions and countries. *Kidney Int* 2005;68(S98):S83-S85.
2. Renal disease in minority populations and developing nations. Proceedings of a satellite meeting of the World Congress of Nephrology. April 25-27, 2007. Petropolis, Brazil. *Ethnicity & disease* 2009;19(1 Suppl 1):S1-1-89.
3. Cass A, Chadban S, Gallagher M, et al. The economic impact of end-stage kidney disease in Australia. Projections to 2020. Available at [www.kidney.org.au](http://www.kidney.org.au): Kidney Health Australia, Melbourne, Australia, 2010.
4. Julius M, Kneisley JD, Carpentier-Alting P, et al. A comparison of employment rates of patients treated with continuous ambulatory peritoneal dialysis vs in-center hemodialysis (Michigan End-Stage Renal Disease Study). *Archives of internal medicine* 1989;149(4):839-42.
5. Pauly RP, Gill JS, Rose CL, et al. Survival among nocturnal home haemodialysis patients compared to kidney transplant recipients. *Nephrology, dialysis, transplantation : official publication of the European Dialysis and Transplant Association - European Renal Association* 2009;24(9):2915-9.
6. Rocco MV, Lockridge J, Beck GJ, et al. The effects of frequent nocturnal home hemodialysis: The Frequent Hemodialysis Network Nocturnal Trial. *Kidney International* 2011;80(10):1080-91.
7. MacGregor MS, Agar JW, Blagg CR. Home haemodialysis-international trends and variation. *Nephrology, dialysis, transplantation : official publication of the European Dialysis and Transplant Association - European Renal Association* 2006;21(7):1934-45.
8. Honkanen EO, Rauta VM. What happened in Finland to increase home hemodialysis? *Hemodial Int* 2008;12 Suppl 1:S11-5.
9. George CR. Caring for kidneys in the antipodes: how Australia and New Zealand have addressed the challenge of end-stage renal failure. *American journal of kidney diseases : the official journal of the National Kidney Foundation* 2009;53(3):536-45.
10. Goovaerts T, Jadoul M, Goffin E. Influence of a pre-dialysis education programme (PDEP) on the mode of renal replacement therapy. *Nephrology, dialysis, transplantation : official publication of the European Dialysis and Transplant Association - European Renal Association* 2005;20(9):1842-47.
11. Castledine C, Gilg J, Rogers C, et al. UK Renal Registry. The Thirteenth Annual Report. Bristol UK: The Renal Association, 2010.
12. Damschroder LJ, Aron DC, Keith RE, et al. Fostering implementation of health services research findings into practice: a consolidated framework for advancing implementation science. *Implement Sci* 2009;4:50.

- 1  
2  
3  
4  
5  
6  
7  
8  
9  
10  
11  
12  
13  
14  
15  
16  
17  
18  
19  
20  
21  
22  
23  
24  
25  
26  
27  
28  
29  
30  
31  
32  
33  
34  
35  
36  
37  
38  
39  
40  
41  
42  
43  
44  
45  
46  
47  
48  
49  
50  
51  
52  
53  
54  
55  
56  
57  
58  
59  
60
13. Casteldine C, Gilg J, Rogers C, et al. RRT incidence and use of home dialysis modalities. The UK Renal Registry 13th Annual Report. Chapter 15. 2010:263-75.
  14. Agar JW, Knight RJ, Simmonds RE, et al. Nocturnal haemodialysis: an Australian cost comparison with conventional satellite haemodialysis. *Nephrology (Carlton, Vic.)* 2005;10(6):557-70.
  15. Morton RM, Tong A, Howard K, et al. The views of patients and carers in treatment decision making for chronic kidney disease: systematic review and thematic synthesis of qualitative studies. *Br Med J* 2011;340:c112.
  16. Morton RM, Tong A, Webster AC, et al. Characteristics of dialysis important to patients and family caregivers: a mixed methods approach. *Nephrology Dialysis Transplantation* 2011;Online first:doi: 10.1093/ndt/gfr177.
  17. Derrett S, Darmody M, Williams S, et al. Older peoples' satisfaction with home-based dialysis. *Nephrology* 2010;15(4):464-70.
  18. Fadem SZ, Walker DR, Abbott G, et al. Satisfaction with renal replacement therapy and education: the American Association of Kidney Patients survey. *Clin J Am Soc Nephrol* 2011;6(3):605-12.
  19. Qamar M, Bender F, Rault R, et al. The United States' perspectives on home dialysis. *Adv Chronic Kidney Dis* 2009;16(3):189-97.
  20. Manns B, Johnson JA, Taub K, et al. Quality of life in patients treated with hemodialysis or peritoneal dialysis: what are the important determinants. *Clin Nephrol* 2003;60(5):341-51.
  21. Lee A, Gudex C, Povlsen JV, et al. Patients' views regarding choice of dialysis modality. *Nephrology, dialysis, transplantation : official publication of the European Dialysis and Transplant Association - European Renal Association* 2008;23(12):3953-9.
  22. Cafazzo JA, Leonard K, Easty AC, et al. Patient-perceived barriers to the adoption of nocturnal home hemodialysis. *Clin J Am Soc Nephrol* 2009;4(4):784-9.
  23. Cases A, Dempster M, Davies M, et al. The experience of individuals with renal failure participating in home haemodialysis: an interpretative phenomenological analysis. *J Health Psychol* 2011;16(6):884-94.
  24. Diaz-Buxo JA, Crawford-Bonadio TL, St Pierre D, et al. Establishing a successful home dialysis program. *Blood Purification* 2006;24(1):22-7.
  25. Liamputtong P. *Qualitative research methods*. Melbourne: Oxford University Press, 2009.
  26. Kvale S. *Interviews*. Thousand Oaks CA: Sage Publications, 1996.
  27. Department of Health. The expert patient: a new approach to chronic disease management for the 21st century. London UK: Stationery Office: Department of Health, 2001.

- 1  
2  
3  
4  
5  
6  
7  
8  
9  
10  
11  
12  
13  
14  
15  
16  
17  
18  
19  
20  
21  
22  
23  
24  
25  
26  
27  
28  
29  
30  
31  
32  
33  
34  
35  
36  
37  
38  
39  
40  
41  
42  
43  
44  
45  
46  
47  
48  
49  
50  
51  
52  
53  
54  
55  
56  
57  
58  
59  
60
28. Barlow J, Wright C, Sheasby J, et al. Self-management approaches for people with chronic conditions: a review. *Patient Educ Counsel* 2002;48:177-87.
29. Lorg K, Sobel DS, Steward AL, et al. Evidence suggesting that a chronic disease self-management program can improve health status while reducing hospitalization: a randomized trial. *Med Care* 1999;37(1):5-14.
30. Gerteis M. *Through the patient's eyes: Understanding and promoting patient-centered care*. San Francisco: Jossey-Bass Publishers, 1993.
31. Winkelmayr WC, Weinstein MC, Mittleman MA, et al. Health economic evaluations: the special case of end-stage renal disease treatment. *Med Decis Making* 2002;22(5):417-30.
32. Goeree R, Manalich J, Grootendorst P, et al. Cost analysis of dialysis treatments for end-stage renal disease (ESRD). *Clin Invest Med* 1995;18(6):455-64.
33. Croxson BE, Ashton T. A cost effectiveness analysis of the treatment of end stage renal failure. *N Z Med J* 1990;103(888):171-4.
34. Vanholder R, Davenport A, Hannedouche T, et al. Reimbursement of Dialysis: A Comparison of Seven Countries. *J Am Soc Nephrol* 2012.
35. Dor A, Pauly MV, Eichleay MA, et al. End-stage renal disease and economic incentives: The international study of health care organization and financing. In: Research NBoE, editor. Cambridge, MA: National Bureau of Economic Research 2007.
36. Golper TA, Saxena AB, Piraino B, et al. Systematic barriers to the effective delivery of home dialysis in the United States: a report from the public policy/advocacy committee of the North American Chapter of the International Society for Peritoneal Dialysis. *American journal of kidney diseases : the official journal of the National Kidney Foundation* 2011;58(6):879-85.
37. Agar JWM, Hawley CM, Kerr PG. Home hemodialysis in Australia and New Zealand: how and why it has been successful. *Sem Dial* 2011;24(6):658-63.
38. Ludlow MJ, George CRP, Hawley C, et al. How Australian nephrologists view home dialysis: results of a national survey. *Nephrology* 2011;16:446-52.
39. Blagg CR. Home haemodialysis: 'home, home, sweet, sweet home!'. *Nephrology* 2005;10:206-14.
40. Lynn KL, Buttimore AL. Future of home haemodialysis in Australia and New Zealand. *Nephrology* 2005;10:231-33.

**Box 1: Semi structured interview questions and topic guide**

- Brief explanation of the study and review of duration of involvement in haemodialysis-related care (to introduce and provide context)

Ask about:

- General clinician experiences of providing dialysis care:  
Which are the most important aspects of caring for a person on haemodialysis, which are the most difficult challenges encountered in caring for patients on dialysis, describe key patient problems with haemodialysis and if the clinician was in charge of their haemodialysis unit, what would they change to improve experiences of patients and/or staff
- Knowledge of home haemodialysis: what has he or she heard about home haemodialysis and is there anything else he or she would like to know about?
- Perceived benefits: Are there any benefits or advantages of home haemodialysis compared with in-centre haemodialysis (*freedom, flexibility, convenience, simplicity, effectiveness, dietary freedom, waiting at hospital for dialysis, less travel time, ability to work or socialize, more family involvement, more privacy*)?
- Perceived risks: What does the clinician see are the risks of patients doing haemodialysis at home? (*isolation, risk/safety, family burden, home modification*)?
- Facilitators: What sorts of programs or support does the clinician think would help patients consider doing home haemodialysis? (*plumbing, support, group meetings, emergency contact, clinician support*)
- Barriers: What does the clinician see are the barriers to home haemodialysis and how could these be addressed?
- Role: If home haemodialysis was offered, what does the clinician think his or her role would be? How does the clinician think his or her current roles and responsibilities will change if home haemodialysis was offered by the clinic?
- Training and support: What additional support or training would the clinician require before home haemodialysis could be offered in his or her practice?
- Attitudes: Would the clinician be supportive of offering home haemodialysis to patients in his or her clinic? Why? Does the clinician think his or her colleagues would be supportive, and why?

1  
2  
3  
4  
5  
6  
7  
8  
9  
10  
11  
12  
13  
14  
15  
16  
17  
18  
19  
20  
21  
22  
23  
24  
25  
26  
27  
28  
29  
30  
31  
32  
33  
34  
35  
36  
37  
38  
39  
40  
41  
42  
43  
44  
45  
46  
47  
48  
49  
50  
51  
52  
53  
54  
55  
56  
57  
58  
59  
60

**Figure legend**

Figure 1. Thematic Schema

For peer review only

**Table 1 | Characteristics of in-centre haemodialysis service provision and reimbursement in participating countries**

| Country   | Type of providers |                    |                    | PD rate | In-clinic haemodialysis reimbursement coverage for private providers |              |                  |                |                 |           |
|-----------|-------------------|--------------------|--------------------|---------|----------------------------------------------------------------------|--------------|------------------|----------------|-----------------|-----------|
|           | Public            | Private for profit | Private non-profit |         | Basic service†                                                       | Nephrologist | Laboratory tests | Erythropoietin | Vascular access | Transport |
| France    | 28%               | 35%                | 37%                | 8%      | X                                                                    |              |                  |                |                 |           |
| Portugal  | 15%               | 85%                | ---                | 7%      | X                                                                    | X            | X                | X              | X               | X         |
| Italy     | 75%               | 25%                | ---                | 11%     | X                                                                    | X            | X                |                |                 |           |
| Germany   | 10%*              | 52%                | 38%                | 5%      | X                                                                    | X            | X                |                |                 |           |
| Sweden    | 90%               | 10%                | ---                | 22%     | X                                                                    | X            | X                | ‡              |                 |           |
| Argentina | 5%                | 95%                | ---                | 5%      | X                                                                    | X            | X                | X              | X               | X         |

\*Includes major hospitals, both public and private. †Includes the basic dialysis service, nephrology nurses and all other staff excluding nephrologist. X – Included in reimbursement coverage. ‡Included on a case-by-case clinic contract basis.

Source: Diaverum estimates based on external publications and internal market knowledge



Table 2 | Participant characteristics

| Characteristics                                            | Interviewees (n) | (%)  |
|------------------------------------------------------------|------------------|------|
| <b>Gender</b>                                              |                  |      |
| Male                                                       | 29               | (69) |
| Female                                                     | 13               | (31) |
| <b>Age</b>                                                 |                  |      |
| 20-29                                                      | 1                | (2)  |
| 30-39                                                      | 6                | (14) |
| 40-49                                                      | 17               | (41) |
| 50-59                                                      | 13               | (31) |
| 60-69                                                      | 5                | (12) |
| <b>Role</b>                                                |                  |      |
| Nephrologist                                               | 28               | (67) |
| Nurse                                                      | 14               | (33) |
| <b>Years of nephrology experience</b>                      |                  |      |
| ≤10                                                        | 6                | (14) |
| 11-20                                                      | 17               | (41) |
| 21-30                                                      | 10               | (24) |
| >30                                                        | 9                | (21) |
| <b>Location (City, Country) of primary dialysis centre</b> |                  |      |
| Marseille, France                                          | 12               | (29) |
| Arles, France                                              | 1                | (2)  |
| Bari, Italy                                                | 1                | (2)  |
| Rome, Italy                                                | 1                | (2)  |
| Potsdam, Germany                                           | 1                | (2)  |
| Buenos Aires, Argentina                                    | 1                | (2)  |
| Taranto, Italy                                             | 1                | (2)  |
| Stockholm, Sweden                                          | 1                | (2)  |
| Malmo, Sweden                                              | 1                | (2)  |
| Marsala, Italy                                             | 3                | (7)  |
| Nissoria, Italy                                            | 3                | (7)  |
| Lisbon, Portugal                                           | 16               | (38) |

Table 3 | Quotations from clinicians to illustrate each theme

| Themes                             | Quotations from participants in study                                                                                                                                                                                                                                                                                                                                                                                                                                                                                                                                                                              |
|------------------------------------|--------------------------------------------------------------------------------------------------------------------------------------------------------------------------------------------------------------------------------------------------------------------------------------------------------------------------------------------------------------------------------------------------------------------------------------------------------------------------------------------------------------------------------------------------------------------------------------------------------------------|
| <b>Structural barriers</b>         |                                                                                                                                                                                                                                                                                                                                                                                                                                                                                                                                                                                                                    |
| Ready access to in-centre dialysis | The transport is paid back by social security. It's easier for them to come to the centre. (Male nephrologist, 40s, France)                                                                                                                                                                                                                                                                                                                                                                                                                                                                                        |
|                                    | We have an in clinic environment more or less every 10 kilometres in capital cities and every 30 kilometres in rural areas... why should you buy additional equipment to comfort people to get treatment at home? ...there is just simply no need to do it at home... (Female nephrologist, 40s, Germany)                                                                                                                                                                                                                                                                                                          |
| Inadequate housing                 | We have some patients with very precarious, fragile homes, shaky homes made of wood, not strong, and not hygienic. (Male nurse, 40s, Portugal)                                                                                                                                                                                                                                                                                                                                                                                                                                                                     |
|                                    | I think it could be a problem for them to manage themselves if they have little space in their house to put the dialysis machine and especially if they are not the owner of their house... maybe the costs of the electricity or hydraulics. (Male nephrologist, 40s, Italy)                                                                                                                                                                                                                                                                                                                                      |
| Unstable economic environment      | It's very difficult to implement when you have limitations. Because you need the thing that... a lot of regions in Argentina don't have... good water. (Male nephrologist, 60s, Argentina)                                                                                                                                                                                                                                                                                                                                                                                                                         |
|                                    | For home haemodialysis in countries like Argentina, Chile, Uruguay, you have financial and economic limits. It's very expensive. The very big cost is around the machine, the dialysis machine and the water treatment. ...In Argentina ...and Brazil we re-use... the haemodialysis filters. In Chile and Uruguay and Brazil, they re-use... the blood line. (Male nephrologist, 60s, Argentina)                                                                                                                                                                                                                  |
|                                    | In my opinion today it's not a good [time]... because of the problem with the financial economic crisis. I don't know if it is more expensive but I would think so. (Male nephrologist, 40s, Portugal)                                                                                                                                                                                                                                                                                                                                                                                                             |
| <b>Centre characteristics</b>      |                                                                                                                                                                                                                                                                                                                                                                                                                                                                                                                                                                                                                    |
| Alternative treatment options      | At that time we had 15 patients on limited care, and among those, most of them did the treatment themselves. Two of them wanted to go home ...that says something... 3 wanted to stay and didn't want the machine at home. (Male nephrologist, 50s, Sweden)                                                                                                                                                                                                                                                                                                                                                        |
|                                    | They started the home haemodialysis project and moved to the assisted, limited person assistance dialysis... some of them were completely autonomous, independent and they did dialysis by themselves... (Male nephrologist, 60s, Italy)                                                                                                                                                                                                                                                                                                                                                                           |
|                                    | Some patients don't want to waste time during the day so they go to the centre, after dinner, they start dialysis. Most of the time they do it themselves, and they have a nurse and a doctor nearby, and they will wake at 7 or 8 o'clock, they take a bath and they go. (Male nephrologist, 60s, Portugal)                                                                                                                                                                                                                                                                                                       |
| Competing priorities               | I think the other alternative maybe is peritoneal dialysis, which is in my opinion a better home dialysis. For the patients, it's much... easier. You can be at home by yourself doing it. I don't know if you can be at home by yourself doing home haemodialysis. (Male nephrologist, 40s, Portugal)                                                                                                                                                                                                                                                                                                             |
|                                    | They prefer to come, to the centres in Portugal, we have comfortable, good centres. (Male nephrologist, 60s, Portugal)                                                                                                                                                                                                                                                                                                                                                                                                                                                                                             |
|                                    | We had a priority to set up extended dialysis with a nightshift dialysis... because... the patients wanted that. So that's what we've basically done the last two months and that means also that half of our clinics are not - I mean right now they're more recruiting for nocturnal dialysis rather than offering them additional options with a home haemodialysis. So we had two competing programs if you may say for younger patients. One was nocturnal dialysis and one was a peritoneal dialysis program where we doubled the numbers of our patients since January. (Female nephrologist, 40s, Germany) |
| Commercial interests               | You need to have also good logistics and structure for [home haemodialysis]... you cannot just have one patient. It's very difficult to have something for very few patients so you need to have a centre or something in the region. (Male nephrologist, 50s, Sweden)                                                                                                                                                                                                                                                                                                                                             |
|                                    | I think in terms of economics it's also better because it's a little cheaper at the beginning with no staff, no transportation. We can also save money without the staff. (Female nephrologist, 50s, Portugal)                                                                                                                                                                                                                                                                                                                                                                                                     |
|                                    | If we send them to home dialysis, we miss [lose] patients from our centres. It's not the most important but it's important. Because there is an economic crisis, I don't want to see my friends, my colleagues have his contract terminated because of this [home haemodialysis] project. (Male nurse, 30s, France)                                                                                                                                                                                                                                                                                                |
|                                    | If the patient goes to home dialysis the doctor might earn less money so if he does earn more with patients in the heavy [large] centres, the doctor might tell him to go in a heavy [large] centre more than home dialysis. (Male nephrologist, 40s, France)                                                                                                                                                                                                                                                                                                                                                      |
|                                    | ...perhaps, also because there is no incentive for personnel and for the organization to permit the diffusion of this type of [home haemo] dialysis... (Male nephrologist, 40s, Italy)                                                                                                                                                                                                                                                                                                                                                                                                                             |
|                                    | So when there are no financial incentives to do home haemodialysis then people don't do it. So, people are not interested in spending €15,000 [on] the patient to set up the infrastructure... that is then only used by one patient. (Female nephrologist, 40s, Germany)                                                                                                                                                                                                                                                                                                                                          |
|                                    | For example, the biggest barrier to peritoneal dialysis is financial. Many doctors don't put patients on                                                                                                                                                                                                                                                                                                                                                                                                                                                                                                           |

| Themes                                         | Quotations from participants in study                                                                                                                                                                                                                                                                                                                                                                             |
|------------------------------------------------|-------------------------------------------------------------------------------------------------------------------------------------------------------------------------------------------------------------------------------------------------------------------------------------------------------------------------------------------------------------------------------------------------------------------|
|                                                | peritoneal dialysis because they think they can make money with haemo [dialysis]. (Male nephrologist, 50s, Sweden)                                                                                                                                                                                                                                                                                                |
| <b>Clinician responsibility and motivation</b> |                                                                                                                                                                                                                                                                                                                                                                                                                   |
|                                                | For example, once he went to emergency unit and his wife never realised he was losing weight. He was seven kilograms overloaded, so he had 7 kilograms of water in his body and she never noticed that. So he could just have died because of this lack of follow up or whatever. (Female nurse, 30s, France)                                                                                                     |
| Safety and security                            | I don't think that security of dialysis at home is the same as in the centres. In the centres we've got a lot of protocols... They are all alone. (Male nephrologist, 30s, France)                                                                                                                                                                                                                                |
|                                                | I think it's not a good idea because today, there is an infection risk. They are not professionals at home...(Female nurse, 20s, France)                                                                                                                                                                                                                                                                          |
|                                                | There is no benefit to leave the patient at home and it is too risky to, too many risks. We have experience with peritoneal dialysis, [patients] who dialyse at home...all come back, with peritonitis, with infections. (Female nurse, 20s, France)                                                                                                                                                              |
|                                                | There is not [an] immediate link with the doctor or a nurse if you suddenly have a problem. (Male nephrologist, 50s, Italy)                                                                                                                                                                                                                                                                                       |
| Knowledge and awareness                        | I've been working here for 18 years and I've never really heard about that so I think it would be quite hard to start home dialysis for patients, here it's not really policy. (Male nurse, 40s, France)                                                                                                                                                                                                          |
|                                                | So far there is no promotion, nobody knows about this so it would be a strategy to start in a good way and to put some new patients to home instead of in centre haemodialysis. (Male nephrologist, 60s, Italy)                                                                                                                                                                                                   |
|                                                | I would be really interested in hearing about the other countries and knowing really how it goes there... (Female nurse, 30s, France)                                                                                                                                                                                                                                                                             |
| Lifestyle benefits                             | It's a liberty for them to be treated at any time of the day, during the night, they can work and they can have other, family life, as normal as possible, that's the main benefit. He stays at home he doesn't have to travel, he can keep his job, continue, does dialysis when he has the time to do it so it can be in front of the television when he has food or whenever. (Male nephrologist, 50s, France) |
|                                                | Home dialysis, it's a beautiful thing because you could dialyse when you want, during the night during the day, you are home and you have no problem, you are at your house, that's the beautiful thing, after you've finished, you could eat, you don't travel [to the centre], it's a beautiful thing. (Male nurse, 50s)                                                                                        |
|                                                | They will feel better ...on long home haemodialysis... that is what I'm expecting. They will feel better; they will take less medication and so on, so they will be [healthier]... (Male nephrologist, 50s, Portugal)                                                                                                                                                                                             |
| Professional development                       | I like new experiences. I think it is good for professional growth. (Female nephrologist, 50s, Italy)                                                                                                                                                                                                                                                                                                             |
|                                                | I think it will be better for the patient and as a nurse I can do my work, my job better. (Male nurse, 40s, Portugal)                                                                                                                                                                                                                                                                                             |
| <b>Cultural apprehension</b>                   |                                                                                                                                                                                                                                                                                                                                                                                                                   |
| Unrelenting imposition                         | There is one room in the house where there is the disease.... We create more problems in the relationship with the partner, who is in charge of dialysis, and sometimes the relationship becomes difficult and aggressive because of this and sometimes people can just divorce because of the dialysis problem. (Male nephrologist, 50s, France)                                                                 |
|                                                | He didn't want to take the hospital home, doing home dialysis, he wanted the disease to stay at the hospital and home was home, no disease at home. (Male nurse, 40s, France)                                                                                                                                                                                                                                     |
|                                                | The patient just wants to come and to have the treatment and to go home and don't think about. Some of them don't want to think to have the machine in the home. You are with your disease all the time because you have that at home, and they say sometimes they want just to have the treatment and after... OK, I forget about it and I have my life like everybody else. (Female nurse, 30s, France)         |
| Carer burden                                   | They [family carers] can't be imprisoned because the father needs a person by his side in dialysis. (Female nephrologist, 40s, Portugal)                                                                                                                                                                                                                                                                          |
|                                                | If there [are] any problems and emergencies it's quite hard here for a nurse to take care of this, so at home, if there is no experience and the person is anxious and it's their relative it would be even harder. Because the patient could be the child the wife the husband it could be harder for them to deal with it. (Male nurse, 30s, France)                                                            |
| Attachment to professionals                    | People are scared about these things, medical things that look more complicated. "I am a normal person I can't do this, I'm not able." So they are very resistant... (Male nephrologist, 60s, Italy)                                                                                                                                                                                                              |
|                                                | I mean if you today go to the hair cutter, you want a certain level of care right...and so we are surrounded by the experiences that whenever we get a service...we're well taken care of. (Female nephrologist, 40s, Germany)                                                                                                                                                                                    |
|                                                | The Portuguese don't like the responsibilities. I think the majority of patients want others to care [for them]. (Female nephrologist, 40s, Portugal)                                                                                                                                                                                                                                                             |
|                                                | Traditionally, everybody is linked to the doctors, everything connected with health is linked to the doctor so it's difficult for the mind set to think about home [haemodialysis], being independent from the doctor. This is a tradition. It's always a problem of mind set; it's stronger in the south [of Italy]. (Male nephrologist, 60s, Italy)                                                             |
|                                                | The patients that are very afraid of everything in the dialysis room, when an alarm of the machine calls, they get very, very scared so I think that at home they will be very scared, because they would [not] feel safe...                                                                                                                                                                                      |

| Themes            | Quotations from participants in study                                                                                                                                                                                                                                                                                                                                                                                                                                                                                                                                                                                                                                                                                                                                                                                                                                                                                                                                                                    |
|-------------------|----------------------------------------------------------------------------------------------------------------------------------------------------------------------------------------------------------------------------------------------------------------------------------------------------------------------------------------------------------------------------------------------------------------------------------------------------------------------------------------------------------------------------------------------------------------------------------------------------------------------------------------------------------------------------------------------------------------------------------------------------------------------------------------------------------------------------------------------------------------------------------------------------------------------------------------------------------------------------------------------------------|
|                   | <p>(Female nephrologist, 40s, Italy)</p> <p>Our people are not so educated in health. They are very afraid of taking care of their own disease. (Female nephrologist, 50s, Italy)</p> <p>The low socio-economic level of the majority of patients - it's very difficult for them. Many people here don't know how to read... and it's very difficult for them to make the treatment. But I think the principal reason is they don't want to be responsible. (Female nephrologist, 40s, Portugal)</p>                                                                                                                                                                                                                                                                                                                                                                                                                                                                                                     |
| Limited awareness | <p>Maybe because of what we tell the patient when he first arrives here so we explain him all the possibilities but... might not talk about home dialysis enough. We don't give enough choice to the patient... (Female nurse, 40s, France)</p> <p>We're obliged to offer them three modalities like haemodialysis, peritoneal dialysis and pre-emptive transplantation...and home haemodialysis ... is not promoted in the sense that we go actively and say, you know, you could also have home haemodialysis. If you feel that the patient is interested then someone would maybe offer it, but we're not promoting it actively. (Female nephrologist, 40s, Germany)</p> <p>I think nephrologists don't talk about it to the patients in most cases. Many patients don't know that it is a possibility. (Female nephrologist, 40s, Portugal)</p> <p>There isn't educational program for these patients; there is no promotion of home haemodialysis for patients. (Male nephrologist, 50s, Italy)</p> |

Table 4 | Suggestions for overcoming clinician barriers to providing home haemodialysis

| Barriers                                                                                    | Potential solutions                                                                                                                                                                                                                                                                                                                                                                                                                                                                                                                                                                                                                                                                                                                                                                                                                                                                                                                                                                                                                                                                                                                                                                                                                                                                                                                                                                                                                                                                                                                                                                                                                                                                                                                                                                                              |
|---------------------------------------------------------------------------------------------|------------------------------------------------------------------------------------------------------------------------------------------------------------------------------------------------------------------------------------------------------------------------------------------------------------------------------------------------------------------------------------------------------------------------------------------------------------------------------------------------------------------------------------------------------------------------------------------------------------------------------------------------------------------------------------------------------------------------------------------------------------------------------------------------------------------------------------------------------------------------------------------------------------------------------------------------------------------------------------------------------------------------------------------------------------------------------------------------------------------------------------------------------------------------------------------------------------------------------------------------------------------------------------------------------------------------------------------------------------------------------------------------------------------------------------------------------------------------------------------------------------------------------------------------------------------------------------------------------------------------------------------------------------------------------------------------------------------------------------------------------------------------------------------------------------------|
| <b>Lack of awareness and experience in home haemodialysis</b>                               | <ul style="list-style-type: none"> <li>• Convene regional and national professional education seminars on home haemodialysis</li> <li>• Incorporate home haemodialysis training in nephrology training programs</li> <li>• Develop and disseminate clinical practice guidelines on home haemodialysis</li> <li>• Organise short-term visits to other centres to gain practical experience</li> <li>• Identify local champions (professional advocates) for home haemodialysis</li> <li>• Disseminate home haemodialysis “success stories” through meetings, newsletters, nephrology society communiqués</li> <li>• Establish centralised home haemodialysis training units to conserve resources and attract training staff</li> </ul>                                                                                                                                                                                                                                                                                                                                                                                                                                                                                                                                                                                                                                                                                                                                                                                                                                                                                                                                                                                                                                                                           |
| <b>Concern about patient safety, adequacy of support, and psychosocial burden</b>           | <ul style="list-style-type: none"> <li>• Facilitate collaboration and interaction with professionals who have extensive experience with home haemodialysis</li> <li>• Develop policies addressing patient safety including 24-hour availability of technical and medical support; patient and carer training, individualised patient assessment for home visits or paid carers; patient access to a “parent dialysis centre” in case of complications; regular patient contact; dedicated psychologist/social worker</li> <li>• Ensure laboratory results can be tracked easily by patients and providers</li> <li>• Coordinate independent accreditation to ensure quality of equipment and dialysis solutions; and conducive home environment</li> <li>• Increase knowledge about the potential clinical benefits of home haemodialysis (use data of current practice to establish an evidence base to support research, which will reflect efficacy of outcomes of home programs; and encourage participation in RCTs of home dialysis versus in-centre dialysis to strengthen evidence base for home HD)</li> <li>• Educate clinicians about the availability of current “patient-friendly” home haemodialysis machines (smaller size, minimise need for a family carer to assist)</li> <li>• Demonstrate patient ability cope with home haemodialysis (self-cannulation, operating simple machines)</li> <li>• Emphasise the importance of fostering patient independence and self-care rather than a “learned helplessness”</li> <li>• Provide respite opportunities for home HD patients to avoid patient and/or carer “burn-out”</li> <li>• Promote further development of simplified home HD machines that are portable and don’t require significant plumbing or electrical changes to home</li> </ul> |
| <b>Limited centre capacity in dialysis centres to establish home haemodialysis programs</b> | <ul style="list-style-type: none"> <li>• Allocate resources and dedicated space for training</li> <li>• Provide home HD training facilities that are geographically separate from in-centre HD facilities</li> </ul>                                                                                                                                                                                                                                                                                                                                                                                                                                                                                                                                                                                                                                                                                                                                                                                                                                                                                                                                                                                                                                                                                                                                                                                                                                                                                                                                                                                                                                                                                                                                                                                             |
| <b>Inadequate compensation and financial disadvantage</b>                                   | <ul style="list-style-type: none"> <li>• Emphasise “patient-centred” care within the organisational culture to minimise influence of commercial interests (for example, to incorporate patient-orientated key performance indicators)</li> <li>• Implement centralization of funding away from commercial interests and reduce physician reimbursement on a fee-for-service model</li> <li>• Compensate clinicians for “hidden tasks” including the planning and management of home haemodialysis programs</li> <li>• Provide additional financial incentives to units including reimbursement at a higher than cost level</li> <li>• Develop public sector funding models that rewards home haemodialysis programs (for example, provide incentive payments for home haemodialysis)</li> </ul>                                                                                                                                                                                                                                                                                                                                                                                                                                                                                                                                                                                                                                                                                                                                                                                                                                                                                                                                                                                                                  |

1  
2  
3  
4  
5  
6  
7  
8  
9  
10  
11  
12  
13  
14  
15  
16  
17  
18  
19  
20  
21  
22  
23  
24  
25  
26  
27  
28  
29  
30  
31  
32  
33  
34  
35  
36  
37  
38  
39  
40  
41  
42  
43  
44  
45  
46  
47  
48  
49

| Barriers                           | Potential solutions                                                                                                                                                                                                                                                                                                                                                                          |
|------------------------------------|----------------------------------------------------------------------------------------------------------------------------------------------------------------------------------------------------------------------------------------------------------------------------------------------------------------------------------------------------------------------------------------------|
|                                    | patients                                                                                                                                                                                                                                                                                                                                                                                     |
|                                    | <ul style="list-style-type: none"><li>• Defray patients' out of pocket expenses for home HD (water, electricity)</li></ul>                                                                                                                                                                                                                                                                   |
| <b>Competing centre priorities</b> | <ul style="list-style-type: none"><li>• Highlight the importance of equity of access to all dialysis modalities (for example, patients may prefer home haemodialysis to in-centre haemodialysis)</li><li>• Provide balanced patient education early in pre-dialysis phase emphasising all dialysis modalities available such that patients are allowed to make an informed choice.</li></ul> |

For peer review only

1  
2  
3  
4  
5  
6  
7  
8  
9  
10  
11  
12  
13  
14  
15  
16  
17  
18  
19  
20  
21  
22  
23  
24  
25  
26  
27  
28  
29  
30  
31  
32  
33  
34  
35  
36  
37  
38  
39  
40  
41  
42  
43  
44  
45  
46  
47  
48  
49

**Figure 1 | Thematic Schema**

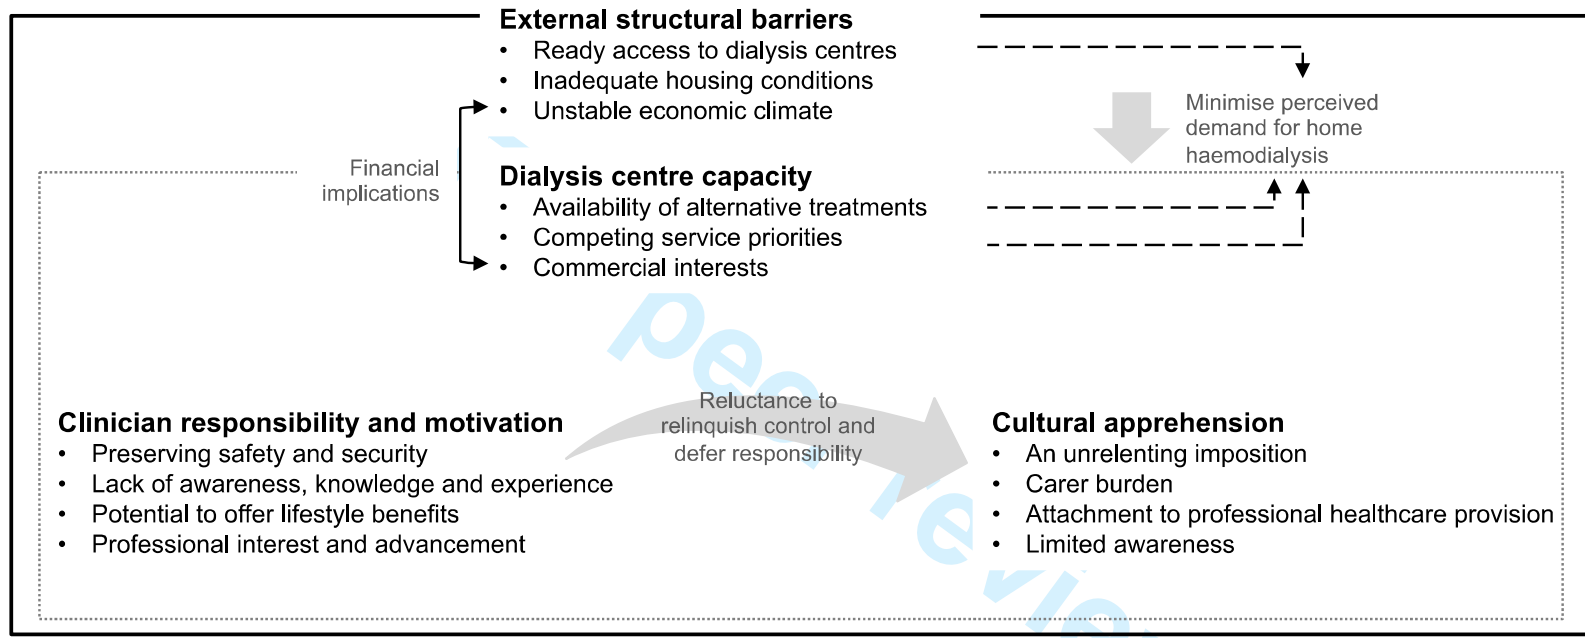

## Clinician beliefs and attitudes about home haemodialysis: A multinational interview study

**Allison Tong**, The Centre for Kidney Research, The Children's Hospital at Westmead, Westmead, NSW 2145 Sydney, Australia; School of Public Health, The University of Sydney, Sydney, NSW, Australia 2006  
*Research Fellow*

**Suetonia Palmer**, Department of Medicine, University of Otago Christchurch, PO Box 4345, Christchurch, 8140, New Zealand  
*Senior Lecturer in medicine, nephrologist*

**Braden Manns**, Department of Medicine and Community Health Sciences, University of Calgary, Canada T2N 2T9  
*Associate Professor, Nephrologist*

**Jonathan C. Craig**, Centre for Kidney Research, The Children's Hospital at Westmead, NSW, Australia 2145; School of Public Health, The University of Sydney, Sydney, NSW, Australia 2006  
*Professor of epidemiology, paediatric nephrologist*

**Marinella Ruospo**, Diaverum Scientific Office, Medical-Scientific Office, Diaverum Renal Services Group, Lund, Sweden  
*Research Officer*

**Letizia Gargano**, Diaverum Scientific Office, Medical-Scientific Office, Diaverum Renal Services Group, Lund, Sweden  
*Dialysis clinical nurse specialist*

**David W. Johnson**, School of Medicine, University of Queensland at Princess Alexandra Hospital, Brisbane, Queensland, Australia 4102  
*Professor of nephrology*

**Jörgen Hegbrant**, Diaverum Medical Office, Diaverum Renal Services Group, Lund, Sweden  
*Chief Medical Officer, nephrologist*

**Måns Olsson**, Diaverum Renal Services Group, Lund, Sweden  
*Head of business development*

**Steven Fishbane**, Hofstra North Shore-LIH School of Medicine, Great Neck NY  
*Chief of Nephrology*

**Giovanni F.M. Strippoli**, Department of Clinical Pharmacology and Epidemiology, Consorzio Mario Negri Sud, Via Nazionale 8/a, 66030, S. Maria Imbaro, Italy; Diaverum Scientific Office, Lund, Sweden; School of Public Health, University of Sydney, Australia, Department of Emergency and Organ Transplantation, University of Bari, Italy  
*Associate Professor of Nephrology*

**Correspondence to:** Giovanni Strippoli, p: +39 3358 756 828 e: [gfmstrippoli@gmail.com](mailto:gfmstrippoli@gmail.com)  
**Word count:** 3601



**Abstract**

**Objectives:** To explore clinician beliefs and attitudes about home haemodialysis in global regions where the prevalence of home haemodialysis is low, and to identify barriers to developing home haemodialysis services and possible strategies to increase acceptance and uptake of home haemodialysis.

**Design:** Semi-structured interviews, thematic analysis

**Setting:** 15 dialysis centres in Italy, Portugal, France, Germany, Sweden and Argentina

**Participants:** 28 nephrologists and 14 nurses caring for patients receiving in-centre haemodialysis

**Results:** We identified four major themes as being central to clinician beliefs about home haemodialysis in regions without established services: external structural barriers (ready access to dialysis centres, inadequate housing conditions, unstable economic environment); dialysis centre characteristics (availability of alternative treatments, competing service priorities, commercial interests); clinician responsibility and motivation (preserving safety and security, lack of awareness, knowledge and experience, potential to offer lifestyle benefits, professional interest and advancement); and cultural apprehension (an unrelenting imposition, carer burden, attachment to professional healthcare provision, limited awareness).

**Conclusions:** Despite recognising the potential benefits of home haemodialysis, clinicians practising in Europe and South America felt apprehensive and doubted the feasibility of home haemodialysis programs. Programs that provide clinicians with direct experience of home haemodialysis could increase acceptance and motivation for home-based haemodialysis, as might service prioritisation and funding models that favour home haemodialysis.

## Article summary

### Article focus:

- To elicit clinician beliefs and attitudes about home haemodialysis in global regions where the prevalence of home haemodialysis is low.
- To identify barriers to developing home haemodialysis services and possible strategies to increase acceptance and uptake of home haemodialysis.

### Key messages:

- Nephrologists and dialysis nurses in regions where home haemodialysis is not established recognise the potential benefits but are pessimistic about the feasibility of developing such programs
- Direct clinician experience and education as well as improved reimbursement for home haemodialysis may assist the establishment of home haemodialysis services
- Clinicians express concern about the quality and safety of home haemodialysis, which may be addressed by increased experience of home dialysis care

### Strengths and limitations of this study:

- We actively sought a broad range of views and experiences through purposive sampling.
- Our study included only clinicians within a large dialysis service provider in Europe and South America.

## Introduction

Approximately 2 million people worldwide receive chronic dialysis treatment for end-stage kidney disease with annual direct healthcare costs that exceed USD 60 billion.<sup>1</sup> The global dialysis population is expanding rapidly in the context of constrained workforce and financial resources. In the last decade the haemodialysis populations in China, India, and Brazil increased 15% each year<sup>2</sup> and in Australia the dialysis population nearly doubled.<sup>3</sup> People who require dialysis treatment experience severely impaired quality of life and role function and have a markedly increased risk of mortality compared to the general population.

Approximately 10% to 20% of people on in-centre haemodialysis die each year and only about 10% are employed.<sup>5</sup> In contrast to in-centre dialysis, people on home haemodialysis may experience a life-expectancy approaching that of a deceased donor kidney transplant recipient.<sup>6</sup> When analyses are controlled for comorbidity, home haemodialysis is associated with better outcomes than in-centre haemodialysis for most measures of effectiveness.<sup>6,7</sup>

Although home haemodialysis is consistently associated with markedly improved quality of life and patient rehabilitation, the prevalence of home haemodialysis as a proportion of all dialysis care varies nearly 100-fold globally. Home haemodialysis is common in New Zealand and Australia (20% of all dialysis patients) but is rare or unavailable in parts of Europe and Scandinavia, the United States, and South America.<sup>8</sup> The reasons for the wide variation in uptake are unclear, although higher home haemodialysis use is characterised by local advocacy and experience combined with service centralisation and favourable reimbursement.<sup>9,10</sup> When patients are educated about home dialysis therapies, about one-half

1  
2  
3 choose self-care dialysis<sup>11</sup> and National Institute for Clinical Excellence (NICE) guidelines  
4  
5 recommend that all suitable patients should be offered the choice between home  
6  
7 haemodialysis and in-centre haemodialysis in a hospital or satellite clinic.<sup>12</sup>  
8  
9

10  
11  
12 Clinicians are critical to the effective implementation of home haemodialysis services<sup>13 14</sup> to  
13  
14 improve patient choice and facilitate increased dialysis service capacity in response to  
15  
16 expanding patient populations.<sup>15</sup> To date there is little published research describing the  
17  
18 attitudes of clinicians toward home haemodialysis in areas where home haemodialysis is rare  
19  
20 or non-existent. In view of the absence of home haemodialysis programmes in some areas  
21  
22 within Europe, Scandinavia, and South America, the aim of this study was to explore the  
23  
24 perceptions of home haemodialysis from nephrologists and dialysis nurses in these regions.  
25  
26  
27

## 28 29 30 **Methods**

31  
32  
33  
34 We invited practicing nephrologists and dialysis nurses from Europe and South America  
35  
36 (France, Germany, Italy, Portugal, Sweden, and Argentina) involved in the care of patients on  
37  
38 chronic haemodialysis in facilities that do not currently provide home haemodialysis services.  
39  
40 We used purposive sampling to select both male and female clinicians from a several  
41  
42 geographical areas in Europe and South America and with diverse clinical experience of  
43  
44 haemodialysis to ensure a broad range of views and experiences of haemodialysis provision.  
45  
46 All participants were recruited from centres within Diaverum, a large dialysis service  
47  
48 provider. Details of dialysis services provision and reimbursement in the participating  
49  
50 countries are provided in **Table 1**. In all contributing countries, access to dialysis services is  
51  
52  
53  
54

1  
2  
3 universal, but the percentage of private providers and reimbursement models varies to a great  
4 extent. Ethics approval was provided by all participating centres.  
5  
6  
7

8  
9  
10 To elicit clinician beliefs and experiences, we developed a semi-structured interview guide  
11 based on a literature review on home haemodialysis (any haemodialysis at home including  
12 thrice weekly dialysis or frequent haemodialysis performed during the day or night) <sup>16-25</sup> and  
13 discussions between the research team (**Box 1**). The interviews focused on knowledge of  
14 home haemodialysis, perceived benefits and risks, potential facilitators and barriers to home  
15 haemodialysis, training and support needs of clinicians, and clinical attitudes toward home  
16 haemodialysis. One author (AT) conducted one face-to-face semi-structured qualitative  
17 interview with each participant in their office or hospital meeting room. An interpreter was  
18 present during interviews with non-English speaking participants (n=20). We ceased  
19 recruitment when theoretical saturation was reached. We recorded contextual details after  
20 each interview. We digitally audio-recorded and transcribed verbatim all interviews in full.  
21  
22  
23

24  
25  
26 We entered transcripts into a software package for storing, coding and searching qualitative  
27 data (HyperRESEARCH Version 3.0.2., ResearchWare, Inc., 2011  
28 [<http://www.research.com>]). Drawing on grounded theory and thematic analysis,<sup>26 27</sup> one  
29 author (AT) coded the transcripts and recorded concepts inductively, grouped similar  
30 concepts, and identified patterns and relationships in the data. AT discussed the preliminary  
31 coding scheme with MR who had independently reviewed the transcripts. The coding structure  
32 was refined until we captured all concepts relating to the perspectives of clinician beliefs and  
33 attitudes about home haemodialysis. To enhance the analytical framework and potential for  
34  
35  
36  
37  
38  
39  
40  
41  
42  
43  
44  
45  
46  
47  
48  
49  
50  
51  
52  
53  
54

1  
2  
3 offering meaningful insight, interpretation of the data and preliminary themes was discussed  
4  
5 by the research team.  
6  
7

## 8 9 10 **Results**

11  
12  
13  
14 We interviewed 42 of 43 invited clinicians (98%) in October and November 2011. One could  
15  
16 not participate because of clinical commitments. Each interview lasted between 25 to 50  
17  
18 minutes. Most participants were nephrologists (n=28), were from Portugal (n=16) or France  
19  
20 (n=13) and were men (n=29) (**Table 1**). The clinicians had between 4 and 28 years of  
21  
22 nephrology experience and ten had previous experience in home haemodialysis.  
23  
24

25  
26 In our analytical framework we identified four themes that were central to clinician beliefs  
27  
28 and attitudes towards home haemodialysis: structural barriers (ready access to existing  
29  
30 treatment, inadequate housing, unstable economic environment), dialysis centre  
31  
32 characteristics (alternative treatment options, competing service priorities, commercial  
33  
34 interests), clinician responsibility and motivation (safety and security, knowledge and  
35  
36 awareness, lifestyle benefits, professional development), and cultural apprehension  
37  
38 (unrelenting imposition, carer burden, attachment to professionals, limited awareness)  
39  
40 (Figure 1). Table 2 provides a selection of quotes from the clinicians to illustrate each theme.  
41  
42  
43  
44

### 45 **Structural barriers**

46  
47  
48  
49  
50 The theme of structural barriers encompassed views on the physical and financial barriers to  
51  
52 home haemodialysis that were believed reduce the motivation and capacity of providers to  
53  
54

1  
2  
3 offer home haemodialysis programs. Access to dialysis centres related to the close proximity  
4 of most patients to existing dialysis services that clinicians thought reduced the need for  
5 home-based care. Housing conditions emphasised the concerns of clinicians that  
6 accommodation and utilities were frequently inadequate to support home haemodialysis. The  
7 economic environment described the widespread anxiety felt by clinicians that dialysis  
8 providers and patients could not afford new home haemodialysis initiatives, particularly in  
9 the current financial climate.  
10  
11  
12  
13  
14  
15  
16  
17  
18  
19  
20

21 *Ready access to dialysis centres*—Almost all clinicians perceived that ready access to  
22 existing dialysis clinics and patient transport reimbursement reduced the need for home  
23 haemodialysis and, because of this, acquisition of capital equipment for home haemodialysis  
24 might be unjustified.  
25  
26  
27  
28  
29  
30  
31

32 *Inadequate housing conditions*—Clinicians considered that home haemodialysis was  
33 impossible for patients with small houses or inadequate hygiene. However, when prompted,  
34 many participants acknowledged they were not familiar with the smaller size of  
35 haemodialysis machines designed for home use. Clinicians mentioned that some patients  
36 could not access clean water or did not own their homes and were therefore were not  
37 permitted to make necessary plumbing or electrical modifications.  
38  
39  
40  
41  
42  
43  
44  
45  
46  
47

48 *Unstable economic environment*—Clinicians believed that the feasibility of establishing  
49 home haemodialysis programs is determined by dedicated government funding which was  
50 unlikely in the present economic climate. Most clinicians were employed by dialysis  
51  
52  
53  
54  
55  
56  
57  
58  
59  
60

1  
2  
3 providers in European countries in financial crisis which, together with government health  
4 budget cuts, were perceived as significant barriers to developing home haemodialysis  
5 services, particularly as they felt the financial risks of such programs were uncertain.  
6  
7  
8  
9

### 10 11 12 **Dialysis centre characteristics** 13

14  
15  
16 The theme centre capacity described the features of dialysis centre practice that quell demand  
17 for home haemodialysis. Alternative treatment options referred to clinic centres offering  
18 home-based peritoneal dialysis and self-care haemodialysis services in preference to home  
19 haemodialysis to offer patients more flexibility and autonomy. Competing priorities related to  
20 the need for dialysis centres to focus on specific dialysis programs often at the expense of  
21 home haemodialysis initiatives because of limited resources and reimbursement policies.  
22  
23  
24  
25  
26  
27  
28

29  
30 Commercial interests described clinician anxiety over the lack of centralised reimbursement  
31 for home haemodialysis; most felt that increased uptake of home haemodialysis would reduce  
32 dialysis provider income and, as a consequence, impact clinician job security.  
33  
34  
35  
36  
37  
38

39 *Availability of alternative treatments*—Clinicians believed that alternative programs offered  
40 by dialysis clinics weakened the demand for home haemodialysis programs. Such treatment  
41 options, which improve patient autonomy at lower cost, include in-centre self or limited care  
42 haemodialysis, in-centre nocturnal haemodialysis, and home peritoneal dialysis.  
43  
44  
45  
46  
47  
48

49  
50 *Competing service priorities*—All clinicians believed that dialysis centres should deliver high  
51 quality care and endeavour to maximise patient satisfaction. Some felt that their centre had  
52  
53  
54



1  
2  
3 insufficient staff and centre facilities to support home haemodialysis training and sustain  
4  
5 home haemodialysis programmes. In addition, some centres were focused on establishing and  
6  
7 maintaining other newer treatment programs including in-centre nocturnal haemodialysis as  
8  
9 well as home peritoneal dialysis and, accordingly, could not diversify further resources into  
10  
11 home haemodialysis programs. Some clinicians suggested that centres which had reached  
12  
13 maximum capacity could consider offering home haemodialysis.  
14  
15

16  
17  
18  
19 *Commercial interests*—Some clinicians acknowledged that dialysis in their regions is an  
20  
21 “industry.” They speculated that centres would incur an overall financial loss if home  
22  
23 haemodialysis was offered. Some were anxious that their centre would lose patients and  
24  
25 income if home haemodialysis was offered, and staff might be made redundant as a result.  
26  
27 Clinicians believed dialysis providers would not invest in new infrastructure for home  
28  
29 haemodialysis programs if the capital and service-related expenses were not reimbursed by  
30  
31 government at the levels currently provided for in-centre haemodialysis. Clinicians believed  
32  
33 centres needed to be sufficiently incentivised by health systems to provide home  
34  
35 haemodialysis at rates comparable to in-centre haemodialysis before home haemodialysis  
36  
37 could be commenced in their centres.  
38  
39  
40  
41  
42

### 43 **Clinician responsibility and motivation**

44  
45  
46  
47

48 The theme clinician responsibility and motivation described the ways in which the clinicians  
49  
50 view their roles in dialysis care. Participants believed that home haemodialysis is beneficial  
51  
52 for patients, but while they are interested in the idea, they are reluctant to relinquish control  
53  
54

1  
2  
3 and defer responsibilities of medical care to patients and their carers. Preserving quality and  
4 safety referred to the need by clinicians to be directly involved in dialysis processes to ensure  
5 their patients were safe on treatment. Lack of awareness, knowledge, and experience  
6 reflected the clinician's own anxieties that they are less knowledgeable in home  
7 haemodialysis but retain a desire to learn more about home haemodialysis. Potential to offer  
8 lifestyle benefits encompassed the understanding of clinicians that home haemodialysis  
9 provides patients with considerable autonomy and self-reliance that can improve their own  
10 functioning and quality of life. Professional interest and advancement described the interest  
11 clinicians have in learning more about home haemodialysis to increase their own professional  
12 skills.  
13  
14  
15  
16  
17  
18  
19  
20  
21  
22  
23  
24  
25  
26  
27

28 *Preserving safety and security*—Clinicians frequently identified quality and safety as key  
29 healthcare priorities within their practice and anticipated that home haemodialysis would  
30 diminish their capacity to protect the well-being of their patients. They voiced concern that  
31 patient monitoring would be less with home haemodialysis and that patients may not adhere  
32 to their prescribed regimens. Also, they believed patients and carers would not safely manage  
33 complications such as infections or cardiovascular events. Dialysis was perceived to require  
34 medical and technical expertise. Clinicians believed that most patients were too old,  
35 dependent, sick, or did not have a suitable carer to have haemodialysis safely at home.  
36 Respondents felt that some patients were unable to maintain proper hygiene standards, or  
37 understand the technical requirements of haemodialysis due to low socioeconomic and  
38 education levels.  
39  
40  
41  
42  
43  
44  
45  
46  
47  
48  
49  
50  
51  
52  
53  
54  
55  
56  
57  
58  
59  
60

1  
2  
3  
4  
5  
6  
7  
8  
9  
10  
11  
12  
13  
14  
15  
16  
17  
18  
19  
20  
21  
22  
23  
24  
25  
26  
27  
28  
29  
30  
31  
32  
33  
34  
35  
36  
37  
38  
39  
40  
41  
42  
43  
44  
45  
46  
47  
48  
49  
50  
51  
52  
53  
54  
55  
56  
57  
58  
59  
60

*Lack of awareness, knowledge and experience*—Many clinicians acknowledged that they lacked sufficient knowledge and awareness about home haemodialysis to be confident about it as a treatment option and suggested they needed more information. For example, they suggested that learning about the experiences of home haemodialysis from colleagues and patients in other regions with established programmes would increase the potential for development of home haemodialysis services in their own centres.

*Potential to offer lifestyle benefits*—Clinicians identified numerous benefits of home haemodialysis, which they perceived were predominantly related to patient empowerment and lifestyle, including autonomy, flexibility, comfort and privacy, ability to work, freedom, and increased time. Many believed that home haemodialysis was good particularly for young employed patients and a few suggested that longer dialysis sessions would improve clinical parameters and reduce the need for medications.

*Professional interest and advancement*—Some participants, both nephrologists and nurses, were interested and enthusiastic about offering home haemodialysis, particularly if they believed it would benefit patients. For some, home haemodialysis is a “new” technique which would enable them to acquire additional professional skills and experiences and be better clinicians.

### **Cultural apprehension**

1  
2  
3 The theme cultural apprehension described the concerns that clinicians have about the  
4 disruption to families caused by home haemodialysis and burden of medical responsibility  
5 placed on unwilling patients and their carers by home based care. The clinicians emphasised  
6 that most patients have close family networks and would be unwilling to encumber family  
7 members with the “burden” of dialysis. They believed that patients highly value and depend  
8 on professional medical care within a clinic setting, and if severed, this might cause distress.  
9  
10 Unrelenting imposition encompassed the clinicians’ beliefs that patients would prefer to keep  
11 dialysis away from the home environment and their family and friends. Carer burden  
12 reflected the concern that clinicians hold for the ability of carers to cope with the long term  
13 responsibility for home haemodialysis. Attachments to professional healthcare provision  
14 highlighted the belief held by clinicians that patients desire the security, support, and safety  
15 of in-centre care.  
16  
17  
18  
19  
20  
21  
22  
23  
24  
25  
26  
27  
28  
29  
30  
31

32 *An unrelenting imposition*—Almost all clinicians were convinced that many patients would  
33 be resistant to home haemodialysis and averse to bringing the disease home. Clinicians  
34 believed patients did not want dialysis to disrupt their normality and impinge on everyday  
35 lives. They predicted patients might not wish to have a haemodialysis machine at home as it  
36 would serve as a constant reminder of their disease. Clinicians spoke of home haemodialysis  
37 as being confronting for family and friends and that patients would be unwilling to impose an  
38 unnecessary burden on their families.  
39  
40  
41  
42  
43  
44  
45  
46  
47  
48  
49

50 *Carer burden*—Some clinicians were apprehensive that home haemodialysis would be an  
51 overwhelming burden on family carers. They believed family members were not able  
52  
53  
54  
55  
56  
57  
58  
59  
60

1  
2  
3 perform dialysis, monitor the patient's health status, and manage complications. Clinicians  
4  
5 felt that carers might experience considerable pressure, stress and anxiety.  
6  
7

8  
9  
10 *Attachments to professional healthcare provision*—Clinicians believed that patients relied on  
11  
12 doctors for health-related issues and felt safer receiving care in a medical unit. At a  
13  
14 community level, health education and promotion of self-management for chronic diseases  
15  
16 was generally lacking in the participating regions. Many clinicians anticipated that patients  
17  
18 would feel apprehensive and refuse to “cut the umbilical cord with the clinic”. They  
19  
20 perceived that home based care might disconnect patients from social support of staff and  
21  
22 other patients, impair access to clinicians, and reduce safety. Clinicians felt that separation  
23  
24 from in-centre care would be particularly difficult for patients with a longer previous  
25  
26 experience of in-centre haemodialysis care. They believed patients would be anxious about  
27  
28 taking responsibility for complicated and technical medical tasks.  
29  
30  
31  
32

33  
34 *Limited awareness*—The participants acknowledged that treatment choices made by patients  
35  
36 are shaped by the way doctors present treatment options, which was almost always an “active  
37  
38 promotion” of in-centre haemodialysis. They believed that patients generally trust and  
39  
40 willingly accept treatment recommendations without hesitation. Home haemodialysis was  
41  
42 rarely discussed in clinic consultations and many patients were not aware that home  
43  
44 haemodialysis might be a treatment choice.  
45  
46  
47  
48

## 49 **Discussion**

50  
51  
52  
53  
54  
55

1  
2  
3 The four themes encompassing clinician beliefs and perceptions of home haemodialysis in  
4 regions without established services (external structural barriers, centre capacity, clinician  
5 responsibility and motivation, and cultural apprehension) are useful when considering  
6 strategies to increase acceptance and uptake of home haemodialysis. Clinicians generally  
7 recognise the benefits of home haemodialysis for patients including increased empowerment,  
8 autonomy, and flexibility; however, they are apprehensive about providing home  
9 haemodialysis services and doubt the feasibility of such programs within their regions.

10  
11 Clinicians perceive that patient proximity to dialysis centres and readily available alternative  
12 dialysis modalities negate patient demand for home haemodialysis. Barriers to the  
13 establishment of home haemodialysis services included reimbursement rates for in-centre  
14 haemodialysis, cultural expectations of the clinician's role in medical care, as well as a strong  
15 perception that home haemodialysis could be an unrelenting, overwhelming and unwarranted  
16 burden on their families. Clinicians suggested that their own direct experience of home  
17 haemodialysis could provide confidence in home haemodialysis which, combined with their  
18 own existing professional interest in providing a broad range of treatment options to patients  
19 and families, would increase their motivation to advocate for home haemodialysis services.

20  
21  
22  
23  
24  
25  
26  
27  
28  
29  
30  
31  
32  
33  
34  
35  
36  
37  
38  
39  
40  
41 Research on treatment choices when approaching the need for dialysis suggests that when  
42 patients are fully informed about dialysis modality options, about half choose self-care  
43 dialysis (peritoneal dialysis or haemodialysis) and another 15% choose limited-care clinic-  
44 based haemodialysis.<sup>11</sup> Evidence also indicates that what a clinician believes about patient  
45 survival, treatment effectiveness and quality of life for each dialysis modality strongly  
46 influences the uptake of home haemodialysis. Conversely, limited training or experience in  
47  
48  
49  
50  
51  
52  
53  
54

1  
2  
3 home therapies reduces clinician confidence in home-based care.<sup>14</sup> A dialysis centre  
4  
5 “champion” for home haemodialysis is considered pivotal to increasing and sustaining home-  
6  
7 based dialysis services.<sup>14</sup> These data suggest that increasing clinician’s knowledge and  
8  
9 experience of home haemodialysis in areas without home dialysis services could facilitate the  
10  
11 development of home haemodialysis and, in doing so, broaden dialysis treatment choices for  
12  
13 patients.  
14  
15

16  
17  
18  
19 Increased patient responsibility and control over the management of chronic diseases reduces  
20  
21 symptom severity and improves both patient confidence and clinical outcomes.<sup>28-30</sup>  
22

23 Although home haemodialysis fulfils many tenets of patient-centred care ideology<sup>28 31</sup> and,  
24  
25 accordingly, has the potential to improve outcomes for people who have end-stage kidney  
26  
27 disease, it is apparent that shifting the responsibility for chronic illness management of end-  
28  
29 stage kidney disease toward patients and carers is confronting for clinicians who are  
30  
31 unfamiliar with and inexperienced in home haemodialysis. This perception is potentially in  
32  
33 conflict with the views expressed by patients and carers with experience of earlier stages of  
34  
35 chronic kidney disease not requiring dialysis for whom treatment choices are prioritised by  
36  
37 maximising quality of life.<sup>16</sup>  
38  
39  
40  
41  
42

43 Financial reimbursement for home haemodialysis is a central concern for the interviewed  
44  
45 clinicians. Central reimbursement and regulations governing funding for long-term dialysis  
46  
47 vary considerably across healthcare jurisdictions and may be responsible in part for variable  
48  
49 implementation of home haemodialysis services. Although home haemodialysis is markedly  
50  
51 cheaper than in-centre care,<sup>32-34</sup> few health systems differentiate between dialysis modalities  
52  
53  
54

1  
2  
3 in funding models.<sup>35</sup> In The Netherlands and some states in Australia, home haemodialysis is  
4  
5 incentivised with a higher reimbursement rate than for in-centre haemodialysis, and in the  
6  
7 United Kingdom and Ontario, Canada, reimbursement of home haemodialysis is similar to  
8  
9 in-centre care but reimbursement includes funding for longer hours or extended frequency  
10  
11 dialysis at home. The Belgian health system provides a bonus if a certain number of patients  
12  
13 in a facility perform self-care or home haemodialysis, peritoneal dialysis or transplantation,<sup>35</sup>  
14  
15 while in New Zealand, regional authorities are given overall budgets for renal services,  
16  
17 effectively encouraging home therapies through the incentive for providers to lower overall  
18  
19 costs of care.<sup>36</sup> Funding models that incentivise home haemodialysis in areas of low uptake  
20  
21 would similarly reduce costs to health systems as a whole and directly motivate clinicians  
22  
23 and providers to prioritise new home dialysis programmes.  
24  
25  
26  
27  
28  
29

30 Our study included only clinicians within a large dialysis service provider in Europe and  
31  
32 South America. While the study included a broad range of perspectives, the findings may not  
33  
34 be generalisable to other countries or health provider settings. However, the findings  
35  
36 resonate with barriers to home haemodialysis identified by other studies.<sup>23 37</sup> In common with  
37  
38 other qualitative studies, we cannot assume our findings are representative of the whole  
39  
40 clinician population, although we actively sought a broad range of views and experiences  
41  
42 through purposive sampling. We did not seek participant feedback on the transcripts or  
43  
44 preliminary findings given the challenges of the different languages included. However, we  
45  
46 used investigator triangulation where AT/MR debriefed after each interview, and reviewed  
47  
48 the transcripts independently to ensure the thematic analysis encompassed the full range of  
49  
50 participants' perspectives. For interviews with non-English participants, some cultural or  
51  
52  
53  
54  
55  
56  
57  
58  
59  
60



1  
2  
3 linguistic nuances may not have been captured; however, the concepts and themes we  
4  
5 identified were comparable to those that arose from interviews with English-speaking  
6  
7 participants.  
8  
9

10  
11  
12 Inequalities in global access to home haemodialysis exist within many health systems. A  
13  
14 better understanding of the barriers to home haemodialysis that are relevant to specific health  
15  
16 systems and regions is critical to overcoming them. Using our thematic framework together  
17  
18 with published international experience<sup>37-41</sup> we suggest strategies to foster uptake of home  
19  
20 haemodialysis (**Table 4**). Clinician enthusiasm for a dialysis modality is a key determinant of  
21  
22 the proportion of patients that are treated with that modality<sup>12</sup>; as such, addressing clinician  
23  
24 attitudinal, knowledge and experience barriers may increase acceptance and motivation to  
25  
26 establish home haemodialysis programs. We suggest increasing clinician competence and  
27  
28 familiarity with home haemodialysis is a necessary component of expanding home  
29  
30 haemodialysis care in regions without existing services. Professional education and training  
31  
32 for clinicians could involve interactive seminars with healthcare providers who have  
33  
34 experience in home haemodialysis, visits to other centres to gain hands-on clinical experience  
35  
36 in home haemodialysis,<sup>37</sup> and the support of a “local champion” for home haemodialysis.<sup>12</sup>  
37  
38 Clinicians frequently voice concerns about patient safety suggesting that specific strategies  
39  
40 are needed to minimise potential risks for clinicians and patients in home haemodialysis  
41  
42 programs. These might include 24-hour access to a home haemodialysis clinician, increased  
43  
44 patient and physician education and training, and specific carer support. More work is needed  
45  
46 to determine fully patients’ and clinicians’ views on the design and delivery of such services.  
47  
48  
49  
50  
51  
52  
53  
54  
55  
56  
57  
58  
59  
60

1  
2  
3 The observational nature of the existing evidence for home haemodialysis together with the  
4 concerns that clinicians raise over the safety and durability of home haemodialysis support  
5 the need for a randomised trial evaluating the effectiveness and safety of home  
6 haemodialysis. In addition, research could evaluate the effectiveness of targeted interventions  
7 or strategies to overcome the identified barriers to home haemodialysis (such as small-scale  
8 implementation of home haemodialysis in selected centres, patient-friendly technology,  
9 improved reimbursement, and clinician education programmes) to increase the uptake of  
10 home haemodialysis.  
11  
12  
13  
14  
15  
16  
17  
18  
19

20  
21  
22  
23 This analysis suggests potential barriers to the development of home haemodialysis  
24 programmes specific to regions without active home haemodialysis services that include  
25 structural barriers, competing treatment choices and services, the role of the clinician in care,  
26 and cultural perspectives within health delivery. Specific strategies to address these issues  
27 may increase access to home haemodialysis in some global regions.  
28  
29  
30  
31  
32  
33  
34  
35  
36  
37  
38  
39  
40  
41  
42  
43  
44  
45  
46  
47  
48  
49  
50  
51  
52  
53  
54  
55  
56  
57  
58  
59  
60

## Acknowledgements

We would like to thank all the clinicians who volunteered their time to participate in this study.

## Copyright/licence for publication

The Corresponding Author has the right to grant on behalf of all authors and does grant on behalf of all authors, a worldwide licence to the Publishers and its licensees in perpetuity, in all forms, formats and media (whether known now or created in the future), to i) publish, reproduce, distribute, display and store the Contribution, ii) translate the Contribution into other languages, create adaptations, reprints, include within collections and create summaries, extracts and/or, abstracts of the Contribution, iii) create any other derivative work(s) based on the Contribution, iv) to exploit all subsidiary rights in the Contribution, v) the inclusion of electronic links from the Contribution to third party material where-ever it may be located; and, vi) licence any third party to do any or all of the above.

## Declaration of competing interests

All authors have completed the Unified Competing Interest form at [www.icmje.org/coi\\_disclosure.pdf](http://www.icmje.org/coi_disclosure.pdf) (available on request from the corresponding author) and declare: the study has been part-funded by an unrestricted grant from Diaverum AB, a global provider of renal services. The study sponsor commissioned the work to an independent steering committee and had no role in study design; collection, analysis, and interpretation of data; writing the report; and the decision to submit the report for publication; AT is supported

1  
2  
3 by the National Health and Medical Research Council Early Career Fellowship ID 1037162;  
4  
5 SP is supported in part by an by an unrestricted grant from Amgen Dompé administered by  
6  
7 the Mario Negri Sud Consortium, Italy; DJ has received research grants, travel sponsorships  
8  
9 and consultancy fees from Baxter Healthcare and Fresenius Medical Care and is a current  
10  
11 recipient of a Queensland Government Health Research Fellowship. JH is Chief Medical  
12  
13 Officer at Diaverum AB, a global provider of renal services; GFMS is Senior Vice President  
14  
15 scientific affairs at Diaverum AB, a global provider of renal services: no other relationships  
16  
17 or activities that could appear to have influenced the submitted work.  
18  
19  
20  
21  
22

### 23 **Details of contributors**

24  
25 All authors, external and internal, had full access to all of the data in the study and can take  
26  
27 responsibility for the integrity of the data and the accuracy of the data analysis.  
28  
29  
30  
31

### 32 **Contributions**

33  
34 AT participated in the design of the study, did the interviews, transcribed the interviews,  
35  
36 carried out the thematic analysis and drafted the manuscript. SP designed the study,  
37  
38 participated in the thematic analysis and critical review of the first and subsequent manuscript  
39  
40 drafts. BM and JC provided intellectual input into first and subsequent manuscript drafts and  
41  
42 assisted with thematic analysis. MR, LG, JH and MO assisted with interviews and provided  
43  
44 intellectual input into subsequent manuscript drafts. DWJ assisted with thematic analysis and  
45  
46 provided intellectual input into primary and subsequent drafts. JH and MO provided  
47  
48 intellectual input into subsequent manuscript drafts. GS conceived the study, obtained  
49  
50  
51  
52  
53  
54  
55  
56  
57  
58  
59  
60

1  
2  
3 funding, assisted with study design and thematic analysis, provided intellectual input into  
4  
5 subsequent manuscript drafts and is the guarantor.  
6  
7  
8  
9

### 10 **Ethics approval**

11 Ethics approval was obtained for the study as follows:

12  
13 -for participants from France we received ethic approval from Comité de Protection des  
14  
15 Personnes Sud-Méditerranée II, 2011-AO1044-37  
16  
17

18 -for participants from Diaverum (Portugal, Sweden, Germany, Argentina) we received ethic  
19  
20 approval from Comissão de Ética da Diaverum, aprovação n. 01/2011  
21  
22

23 -for Italy we informed ethics committees according to Italian law (Italian  
24  
25 Republic. Determination of the Italian Medicines Agency of March 20, 2008 [in  
26  
27 Italian]. *Official Gazette of the Italian Republic*. General Series No. 76; March 31, 2008).  
28  
29

30 For Argentina there was no requirement for ethics submissions for this type of study.  
31

32 All participants provided written voluntary informed consent.  
33  
34  
35  
36

### 37 **Data sharing**

38 No additional data available  
39  
40  
41  
42  
43  
44  
45  
46  
47  
48  
49  
50  
51  
52  
53  
54  
55  
56  
57  
58  
59  
60

## References

1. Atkins RC. The changing patterns of chronic kidney disease: The need to develop strategies for prevention relevant to different regions and countries. *Kidney Int* 2005;68(S98):S83-S85.
2. Renal disease in minority populations and developing nations. Proceedings of a satellite meeting of the World Congress of Nephrology. April 25-27, 2007. Petropolis, Brazil. *Ethnicity & disease* 2009;19(1 Suppl 1):S1-1-89.
3. Cass A, Chadban S, Gallagher M, Howard K, Jones A, McDonald S, et al. The economic impact of end-stage kidney disease in Australia. Projections to 2020. Available at [www.kidney.org.au](http://www.kidney.org.au); Kidney Health Australia, Melbourne, Australia, 2010.
4. U.S. Renal Data System, USRDS 2009 Annual Data Report: Atlas of End-Stage Renal Disease in the United States, National Institutes of Health, National Institute of Diabetes and Digestive and Kidney Diseases, Bethesda, MD, 2009.
5. Julius M, Kneisley JD, Carpentier-Altling P, Hawthorne VM, Wolfe RA, Port FK. A comparison of employment rates of patients treated with continuous ambulatory peritoneal dialysis vs in-center hemodialysis (Michigan End-Stage Renal Disease Study). *Archives of internal medicine* 1989;149(4):839-42.
6. Pauly RP, Gill JS, Rose CL, Asad RA, Chery A, Pierratos A, et al. Survival among nocturnal home haemodialysis patients compared to kidney transplant recipients. *Nephrology, dialysis, transplantation : official publication of the European Dialysis and Transplant Association - European Renal Association* 2009;24(9):2915-9.
7. Rocco MV, Lockridge J, Beck GJ, Eggers PW, Gassman JJ, Greene T, et al. The effects of frequent nocturnal home hemodialysis: The Frequent Hemodialysis Network Nocturnal Trial. *Kidney International* 2011;80(10):1080-91.
8. MacGregor MS, Agar JW, Blagg CR. Home haemodialysis-international trends and variation. *Nephrology, dialysis, transplantation : official publication of the European Dialysis and Transplant Association - European Renal Association* 2006;21(7):1934-45.
9. Honkanen EO, Rauta VM. What happened in Finland to increase home hemodialysis? *Hemodial Int* 2008;12 Suppl 1:S11-5.
10. George CR. Caring for kidneys in the antipodes: how Australia and New Zealand have addressed the challenge of end-stage renal failure. *American journal of kidney diseases : the official journal of the National Kidney Foundation* 2009;53(3):536-45.

11. Goovaerts T, Jadoul M, Goffin E. Influence of a pre-dialysis education programme (PDEP) on the mode of renal replacement therapy. *Nephrology, dialysis, transplantation : official publication of the European Dialysis and Transplant Association - European Renal Association* 2005;20(9):1842-47.
12. Castledine C, Gilg J, Rogers C, Ben-Shlomo Y, Caskey F. UK Renal Registry. The Thirteenth Annual Report. Bristol UK: The Renal Association, 2010.
13. Damschroder LJ, Aron DC, Keith RE, Kirsh SR, Alexander JA, Lowery JC. Fostering implementation of health services research findings into practice: a consolidated framework for advancing implementation science. *Implement Sci* 2009;4:50.
14. Casteldine C, Gilg J, Rogers C, Ben-Shlomo Y, Caskey F. RRT incidence and use of home dialysis modalities. The UK Renal Registry 13th Annual Report. Chapter 15. 2010:263-75.
15. Agar JW, Knight RJ, Simmonds RE, Boddington JM, Waldron CM, Somerville CA. Nocturnal haemodialysis: an Australian cost comparison with conventional satellite haemodialysis. *Nephrology (Carlton, Vic.)* 2005;10(6):557-70.
16. Morton RM, Tong A, Howard K, Snelling P, Webster AC. The views of patients and carers in treatment decision making for chronic kidney disease: systematic review and thematic synthesis of qualitative studies. *Br Med J* 2011;340:c112.
17. Morton RM, Tong A, Webster AC, Snelling P, Howard K. Characteristics of dialysis important to patients and family caregivers: a mixed methods approach. *Nephrology Dialysis Transplantation* 2011;26(12):4038.
18. Derrett S, Darmody M, Williams S, Rutherford M, Schollum J, Walker R. Older peoples' satisfaction with home-based dialysis. *Nephrology* 2010;15(4):464-70.
19. Fadem SZ, Walker DR, Abbott G, Friedman AL, Goldman R, Sexton S, et al. Satisfaction with renal replacement therapy and education: the American Association of Kidney Patients survey. *Clin J Am Soc Nephrol* 2011;6(3):605-12.
20. Qamar M, Bender F, Rault R, Piraino B. The United States' perspectives on home dialysis. *Adv Chronic Kidney Dis* 2009;16(3):189-97.
21. Manns B, Johnson JA, Taub K, Mortis G, Ghali WA, Donaldson C. Quality of life in patients treated with hemodialysis or peritoneal dialysis: what are the important determinants. *Clin Nephrol* 2003;60(5):341-51.

- 1  
2  
3  
4  
5  
6  
7  
8  
9  
10  
11  
12  
13  
14  
15  
16  
17  
18  
19  
20  
21  
22  
23  
24  
25  
26  
27  
28  
29  
30  
31  
32  
33  
34  
35  
36  
37  
38  
39  
40  
41  
42  
43  
44  
45  
46  
47  
48  
49  
50  
51  
52  
53  
54  
55  
56  
57  
58  
59  
60
22. Lee A, Gudex C, Povlsen JV, Bonnevie B, Nielsen CP. Patients' views regarding choice of dialysis modality. *Nephrology, dialysis, transplantation : official publication of the European Dialysis and Transplant Association - European Renal Association* 2008;23(12):3953-9.
23. Cafazzo J, Leonard K, Easty AC, Rossos PG, Chan CT. Patient-perceived barriers to the adoption of nocturnal home hemodialysis. *Clin J Am Soc Nephrol* 2009;4(4):784-9.
24. Cases A, Dempster M, Davies M, Gamble G. The experience of individuals with renal failure participating in home haemodialysis: an interpretative phenomenological analysis. *J Health Psychol* 2011;16(6):884-94.
25. Diaz-Buxo JA, Crawford-Bonadio TL, St Pierre D, Ingram KM. Establishing a successful home dialysis program. *Blood Purification* 2006;24(1):22-7.
26. Liamputtong P. *Qualitative research methods*. Melbourne: Oxford University Press, 2009.
27. Kvale S. *Interviews*. Thousand Oaks CA: Sage Publications, 1996.
28. Department of Health. The expert patient: a new approach to chronic disease management for the 21st century. London UK: Stationery Office: Department of Health, 2001.
29. Barlow J, Wright C, Sheasby J, Turner A, Hainsworth J. Self-management approaches for people with chronic conditions: a review. *Patient Educ Counsel* 2002;48:177-87.
30. Lorg K, Sobel DS, Steward AL, Brown BW, Bandura A, Ritter P, et al. Evidence suggesting that a chronic disease self-management program can improve health status while reducing hospitalization: a randomized trial. *Med Care* 1999;37(1):5-14.
31. Gerteis M. *Through the patient's eyes: Understanding and promoting patient-centered care*. San Francisco: Jossey-Bass Publishers, 1993.
32. Winkelmayr WC, Weinstein MC, Mittleman MA, Glynn RJ, Pliskin JS. Health economic evaluations: the special case of end-stage renal disease treatment. *Med Decis Making* 2002;22(5):417-30.
33. Goeree R, Manalich J, Grootendorst P, Beecroft ML, Churchill DN. Cost analysis of dialysis treatments for end-stage renal disease (ESRD). *Clin Invest Med* 1995;18(6):455-64.
34. Croxson BE, Ashton T. A cost effectiveness analysis of the treatment of end stage renal failure. *N Z Med J* 1990;103(888):171-4.



1  
2  
3 35. Vanholder R, Davenport A, Hannedouche T, Kooman J, Kribben A, Lameire N, et al.  
4 Reimbursement of Dialysis: A Comparison of Seven Countries. *J Am Soc Nephrol* 2012.  
5  
6

7 36. Dor A, Pauly MV, Eichleay MA, Held PJ. End-stage renal disease and economic  
8 incentives: The international study of health care organization and financing. In: Research  
9 NBoE, editor. Cambridge, MA: National Bureau of Economic Research 2007.  
10

11 37. Golper TA, Saxena AB, Piraino B, Teitelbaum I, Burkart J, Finkelstein FO, et al.  
12 Systematic barriers to the effective delivery of home dialysis in the United States: a report  
13 from the public policy/advocacy committee of the North American Chapter of the  
14 International Society for Peritoneal Dialysis. *American journal of kidney diseases : the*  
15 *official journal of the National Kidney Foundation* 2011;58(6):879-85.  
16  
17

18 38. Agar JWM, Hawley CM, Kerr PG. Home hemodialysis in Australia and New Zealand:  
19 how and why it has been successful. *Sem Dial* 2011;24(6):658-63.  
20  
21

22 39. Ludlow MJ, George CRP, Hawley C, Mathew TH, Agar JWM, Kerr PG, et al. How  
23 Australian nephrologists view home dialysis: results of a national survey. *Nephrology*  
24 2011;16:446-52.  
25  
26

27 40. Blagg CR. Home haemodialysis: 'home, home, sweet, sweet home!'. *Nephrology*  
28 2005;10:206-14.  
29  
30

31 41. Lynn KL, Buttimore AL. Future of home haemodialysis in Australia and New Zealand.  
32 *Nephrology* 2005;10:231-33.  
33  
34  
35  
36  
37  
38  
39  
40  
41  
42  
43  
44  
45  
46  
47  
48  
49  
50  
51  
52  
53  
54  
55  
56  
57  
58  
59  
60

**Box 1: Semi structured interview questions and topic guide**

- Brief explanation of the study and review of duration of involvement in haemodialysis-related care (to introduce and provide context)

Ask about:

- General clinician experiences of providing dialysis care:  
Which are the most important aspects of caring for a person on haemodialysis, which are the most difficult challenges encountered in caring for patients on dialysis, describe key patient problems with haemodialysis and if the clinician was in charge of their haemodialysis unit, what would they change to improve experiences of patients and/or staff
- Knowledge of home haemodialysis: what has he or she heard about home haemodialysis and is there anything else he or she would like to know about?
- Perceived benefits: Are there any benefits or advantages of home haemodialysis compared with in-centre haemodialysis (*freedom, flexibility, convenience, simplicity, effectiveness, dietary freedom, waiting at hospital for dialysis, less travel time, ability to work or socialize, more family involvement, more privacy*)?
- Perceived risks: What does the clinician see are the risks of patients doing haemodialysis at home? (*isolation, risk/safety, family burden, home modification*)?
- Facilitators: What sorts of programs or support does the clinician think would help patients consider doing home haemodialysis? (*plumbing, support, group meetings, emergency contact, clinician support*)
- Barriers: What does the clinician see are the barriers to home haemodialysis and how could these be addressed?
- Role: If home haemodialysis was offered, what does the clinician think his or her role would be? How does the clinician think his or her current roles and responsibilities will change if home haemodialysis was offered by the clinic?
- Training and support: What additional support or training would the clinician require before home haemodialysis could be offered in his or her practice?
- Attitudes: Would the clinician be supportive of offering home haemodialysis to patients in his or her clinic? Why? Does the clinician think his or her colleagues would be supportive, and why?

1  
2  
3  
4  
5  
6  
7  
8  
9  
10  
11  
12  
13  
14  
15  
16  
17  
18  
19  
20  
21  
22  
23  
24  
25  
26  
27  
28  
29  
30  
31  
32  
33  
34  
35  
36  
37  
38  
39  
40  
41  
42  
43  
44  
45  
46  
47  
48  
49  
50  
51  
52  
53  
54  
55  
56  
57  
58  
59  
60

**Figure legend**

Figure 1. Thematic Schema

For peer review only

**Table 1 | Characteristics of in-centre haemodialysis service provision and reimbursement in participating countries**

| Country   | Type of providers |                    |                    | PD rate | In-clinic haemodialysis reimbursement coverage for private providers |              |                  |                |                 |           |
|-----------|-------------------|--------------------|--------------------|---------|----------------------------------------------------------------------|--------------|------------------|----------------|-----------------|-----------|
|           | Public            | Private for profit | Private non-profit |         | Basic service†                                                       | Nephrologist | Laboratory tests | Erythropoietin | Vascular access | Transport |
| France    | 28%               | 35%                | 37%                | 8%      | X                                                                    |              |                  |                |                 |           |
| Portugal  | 15%               | 85%                | ---                | 7%      | X                                                                    | X            | X                | X              | X               | X         |
| Italy     | 75%               | 25%                | ---                | 11%     | X                                                                    | X            | X                |                |                 |           |
| Germany   | 10%*              | 52%                | 38%                | 5%      | X                                                                    | X            | X                |                |                 |           |
| Sweden    | 90%               | 10%                | ---                | 22%     | X                                                                    | X            | X                | ‡              |                 |           |
| Argentina | 5%                | 95%                | ---                | 5%      | X                                                                    | X            | X                | X              | X               | X         |

\*Includes major hospitals, both public and private. †Includes the basic dialysis service, nephrology nurses and all other staff excluding nephrologist. X – Included in reimbursement coverage. ‡Included on a case-by-case clinic contract basis.

Source: Diaverum estimates based on external publications and internal market knowledge

Table 2 | Participant characteristics

| Characteristics                                            | Interviewees (n) | (%)  |
|------------------------------------------------------------|------------------|------|
| <b>Gender</b>                                              |                  |      |
| Male                                                       | 29               | (69) |
| Female                                                     | 13               | (31) |
| <b>Age</b>                                                 |                  |      |
| 20-29                                                      | 1                | (2)  |
| 30-39                                                      | 6                | (14) |
| 40-49                                                      | 17               | (41) |
| 50-59                                                      | 13               | (31) |
| 60-69                                                      | 5                | (12) |
| <b>Role</b>                                                |                  |      |
| Nephrologist                                               | 28               | (67) |
| Nurse                                                      | 14               | (33) |
| <b>Years of nephrology experience</b>                      |                  |      |
| ≤10                                                        | 6                | (14) |
| 11-20                                                      | 17               | (41) |
| 21-30                                                      | 10               | (24) |
| >30                                                        | 9                | (21) |
| <b>Location (City, Country) of primary dialysis centre</b> |                  |      |
| Marseille, France                                          | 12               | (29) |
| Arles, France                                              | 1                | (2)  |
| Bari, Italy                                                | 1                | (2)  |
| Rome, Italy                                                | 1                | (2)  |
| Potsdam, Germany                                           | 1                | (2)  |
| Buenos Aires, Argentina                                    | 1                | (2)  |
| Taranto, Italy                                             | 1                | (2)  |
| Stockholm, Sweden                                          | 1                | (2)  |
| Malmo, Sweden                                              | 1                | (2)  |
| Marsala, Italy                                             | 3                | (7)  |
| Nissoria, Italy                                            | 3                | (7)  |
| Lisbon, Portugal                                           | 16               | (38) |

Table 3 | Quotations from clinicians to illustrate each theme

| Themes                             | Quotations from participants in study                                                                                                                                                                                                                                                                                                                                                                                                                                                                                                                                                                             |
|------------------------------------|-------------------------------------------------------------------------------------------------------------------------------------------------------------------------------------------------------------------------------------------------------------------------------------------------------------------------------------------------------------------------------------------------------------------------------------------------------------------------------------------------------------------------------------------------------------------------------------------------------------------|
| <b>Structural barriers</b>         |                                                                                                                                                                                                                                                                                                                                                                                                                                                                                                                                                                                                                   |
| Ready access to in-centre dialysis | The transport is paid back by social security. It's easier for them to come to the centre. (Male nephrologist, 40s, France)                                                                                                                                                                                                                                                                                                                                                                                                                                                                                       |
|                                    | We have an in clinic environment more or less every 10 kilometres in capital cities and every 30 kilometres in rural areas... why should you buy additional equipment to comfort people to get treatment at home? ...there is just simply no need to do it at home... (Female nephrologist, 40s, Germany)                                                                                                                                                                                                                                                                                                         |
| Inadequate housing                 | We have some patients with very precarious, fragile homes, shaky homes made of wood, not strong, and not hygienic. (Male nurse, 40s, Portugal)                                                                                                                                                                                                                                                                                                                                                                                                                                                                    |
|                                    | I think it could be a problem for them to manage themselves if they have little space in their house to put the dialysis machine and especially if they are not the owner of their house... maybe the costs of the electricity or hydraulics. (Male nephrologist, 40s, Italy)                                                                                                                                                                                                                                                                                                                                     |
| Unstable economic environment      | It's very difficult to implement when you have limitations. Because you need the thing that... a lot of regions in Argentina don't have... good water. (Male nephrologist, 60s, Argentina)                                                                                                                                                                                                                                                                                                                                                                                                                        |
|                                    | For home haemodialysis in countries like Argentina, Chile, Uruguay, you have financial and economic limits. It's very expensive. The very big cost is around the machine, the dialysis machine and the water treatment. ...In Argentina ...and Brazil we re-use... the haemodialysis filters. In Chile and Uruguay and Brazil, they re-use... the blood line. (Male nephrologist, 60s, Argentina)                                                                                                                                                                                                                 |
|                                    | In my opinion today it's not a good [time]... because of the problem with the financial economic crisis. I don't know if it is more expensive but I would think so. (Male nephrologist, 40s, Portugal)                                                                                                                                                                                                                                                                                                                                                                                                            |
| <b>Centre characteristics</b>      |                                                                                                                                                                                                                                                                                                                                                                                                                                                                                                                                                                                                                   |
| Alternative treatment options      | At that time we had 15 patients on limited care, and among those, most of them did the treatment themselves. Two of them wanted to go home ...that says something...3 wanted to stay and didn't want the machine at home. (Male nephrologist, 50s, Sweden)                                                                                                                                                                                                                                                                                                                                                        |
|                                    | They started the home haemodialysis project and moved to the assisted, limited person assistance dialysis...some of them were completely autonomous, independent and they did dialysis by themselves... (Male nephrologist, 60s, Italy)                                                                                                                                                                                                                                                                                                                                                                           |
|                                    | Some patients don't want to waste time during the day so they go to the centre, after dinner, they start dialysis. Most of the time they do it themselves, and they have a nurse and a doctor nearby, and they will wake at 7 or 8 o'clock, they take a bath and they go. (Male nephrologist, 60s, Portugal)                                                                                                                                                                                                                                                                                                      |
| Competing priorities               | I think the other alternative maybe is peritoneal dialysis, which is in my opinion a better home dialysis. For the patients, it's much...easier. You can be at home by yourself doing it. I don't know if you can be at home by yourself doing home haemodialysis. (Male nephrologist, 40s, Portugal)                                                                                                                                                                                                                                                                                                             |
|                                    | They prefer to come, to the centres in Portugal, we have comfortable, good centres. (Male nephrologist, 60s, Portugal)                                                                                                                                                                                                                                                                                                                                                                                                                                                                                            |
|                                    | We had a priority to set up extended dialysis with a nightshift dialysis... because...the patients wanted that. So that's what we've basically done the last two months and that means also that half of our clinics are not - I mean right now they're more recruiting for nocturnal dialysis rather than offering them additional options with a home haemodialysis. So we had two competing programs if you may say for younger patients. One was nocturnal dialysis and one was a peritoneal dialysis program where we doubled the numbers of our patients since January. (Female nephrologist, 40s, Germany) |
| Commercial interests               | You need to have also good logistics and structure for [home haemodialysis]...you cannot just have one patient. It's very difficult to have something for very few patients so you need to have a centre or something in the region. (Male nephrologist, 50s, Sweden)                                                                                                                                                                                                                                                                                                                                             |
|                                    | I think in terms of economics it's also better because it's a little cheaper at the beginning with no staff, no transportation. We can also save money without the staff. (Female nephrologist, 50s, Portugal)                                                                                                                                                                                                                                                                                                                                                                                                    |
|                                    | If we send them to home dialysis, we miss [lose] patients from our centres. It's not the most important but it's important. Because there is an economic crisis, I don't want to see my friends, my colleagues have his contract terminated because of this [home haemodialysis] project. (Male nurse, 30s, France)                                                                                                                                                                                                                                                                                               |
|                                    | If the patient goes to home dialysis the doctor might earn less money so if he does earn more with patients in the heavy [large] centres, the doctor might tell him to go in a heavy [large] centre more than home dialysis. (Male nephrologist, 40s, France)                                                                                                                                                                                                                                                                                                                                                     |
|                                    | ...perhaps, also because there is no incentive for personnel and for the organization to permit the diffusion of this type of [home haemo] dialysis... (Male nephrologist, 40s, Italy)                                                                                                                                                                                                                                                                                                                                                                                                                            |

| Themes                                         | Quotations from participants in study                                                                                                                                                                                                                                                                                                                                                                             |
|------------------------------------------------|-------------------------------------------------------------------------------------------------------------------------------------------------------------------------------------------------------------------------------------------------------------------------------------------------------------------------------------------------------------------------------------------------------------------|
|                                                | So when there are no financial incentives to do home haemodialysis then people don't do it. So, people are not interested in spending €15,000 [on] the patient to set up the infrastructure...that is then only used by one patient. (Female nephrologist, 40s, Germany)                                                                                                                                          |
|                                                | For example, the biggest barrier to peritoneal dialysis is financial. Many doctors don't put patients on peritoneal dialysis because they think they can make money with haemo [dialysis]. (Male nephrologist, 50s, Sweden)                                                                                                                                                                                       |
| <b>Clinician responsibility and motivation</b> |                                                                                                                                                                                                                                                                                                                                                                                                                   |
|                                                | For example, once he went to emergency unit and his wife never realised he was losing weight. He was seven kilograms overloaded, so he had 7 kilograms of water in his body and she never noticed that. So he could just have died because of this lack of follow up or whatever. (Female nurse, 30s, France)                                                                                                     |
|                                                | I don't think that security of dialysis at home is the same as in the centres. In the centres we've got a lot of protocols... They are all alone. (Male nephrologist, 30s, France)                                                                                                                                                                                                                                |
| Safety and security                            | I think it's not a good idea because today, there is an infection risk. They are not professionals at home... (Female nurse, 20s, France)                                                                                                                                                                                                                                                                         |
|                                                | There is no benefit to leave the patient at home and it is too risky to, too many risks. We have experience with peritoneal dialysis, [patients] who dialyse at home...all come back, with peritonitis, with infections. (Female nurse, 20s, France)                                                                                                                                                              |
|                                                | There is not [an] immediate link with the doctor or a nurse if you suddenly have a problem. (Male nephrologist, 50s, Italy)                                                                                                                                                                                                                                                                                       |
| Knowledge and awareness                        | I've been working here for 18 years and I've never really heard about that so I think it would be quite hard to start home dialysis for patients, here it's not really policy. (Male nurse, 40s, France)                                                                                                                                                                                                          |
|                                                | So far there is no promotion, nobody knows about this so it would be a strategy to start in a good way and to put some new patients to home instead of in centre haemodialysis. (Male nephrologist, 60s, Italy)                                                                                                                                                                                                   |
|                                                | I would be really interested in hearing about the other countries and knowing really how it goes there... (Female nurse, 30s, France)                                                                                                                                                                                                                                                                             |
| Lifestyle benefits                             | It's a liberty for them to be treated at any time of the day, during the night, they can work and they can have other, family life, as normal as possible, that's the main benefit. He stays at home he doesn't have to travel, he can keep his job, continue, does dialysis when he has the time to do it so it can be in front of the television when he has food or whenever. (Male nephrologist, 50s, France) |
|                                                | Home dialysis, it's a beautiful thing because you could dialyse when you want, during the night during the day, you are home and you have no problem, you are at your house, that's the beautiful thing, after you've finished, you could eat, you don't travel [to the centre], it's a beautiful thing. (Male nurse, 50s)                                                                                        |
|                                                | They will feel better ...on long home haemodialysis... that is what I'm expecting. They will feel better; they will take less medication and so on, so they will be [healthier]... (Male nephrologist, 50s, Portugal)                                                                                                                                                                                             |
| Professional development                       | I like new experiences. I think it is good for professional growth. (Female nephrologist, 50s, Italy)                                                                                                                                                                                                                                                                                                             |
|                                                | I think it will be better for the patient and as a nurse I can do my work, my job better. (Male nurse, 40s, Portugal)                                                                                                                                                                                                                                                                                             |
| <b>Cultural apprehension</b>                   |                                                                                                                                                                                                                                                                                                                                                                                                                   |
| Unrelenting imposition                         | There is one room in the house where there is the disease.... We create more problems in the relationship with the partner, who is in charge of dialysis, and sometimes the relationship becomes difficult and aggressive because of this and sometimes people can just divorce because of the dialysis problem. (Male nephrologist, 50s, France)                                                                 |
|                                                | He didn't want to take the hospital home, doing home dialysis, he wanted the disease to stay at the hospital and home was home, no disease at home. (Male nurse, 40s, France)                                                                                                                                                                                                                                     |
|                                                | The patient just wants to come and to have the treatment and to go home and don't think about. Some of them don't want to think to have the machine in the home. You are with your disease all the time because you have that at home, and they say sometimes they want just to have the treatment and after... OK, I forget about it and I have my life like everybody else. (Female nurse, 30s, France)         |
| Carer burden                                   | They [family carers] can't be imprisoned because the father needs a person by his side in dialysis. (Female nephrologist, 40s, Portugal)                                                                                                                                                                                                                                                                          |
|                                                | If there [are] any problems and emergencies it's quite hard here for a nurse to take care of this, so at home, if there is no experience and the person is anxious and it's their relative it would be even harder. Because the patient could be the child the wife the husband it could be harder for them to deal with it. (Male nurse, 30s, France)                                                            |
| Attachment to professionals                    | People are scared about these things, medical things that look more complicated. "I am a normal person I can't do this, I'm not able." So they are very resistant... (Male nephrologist, 60s, Italy)                                                                                                                                                                                                              |
|                                                | I mean if you today go to the hair cutter, you want a certain level of care right...and so we are surrounded by the experiences that whenever we get a service...we're well taken care of. (Female nephrologist, 40s,                                                                                                                                                                                             |

| Themes            | Quotations from participants in study                                                                                                                                                                                                                                                                                                                                                                                |
|-------------------|----------------------------------------------------------------------------------------------------------------------------------------------------------------------------------------------------------------------------------------------------------------------------------------------------------------------------------------------------------------------------------------------------------------------|
|                   | Germany)                                                                                                                                                                                                                                                                                                                                                                                                             |
|                   | The Portuguese don't like the responsibilities. I think the majority of patients want others to care [for them]. (Female nephrologist, 40s, Portugal)                                                                                                                                                                                                                                                                |
|                   | Traditionally, everybody is linked to the doctors, everything connected with health is linked to the doctor so it's difficult for the mind set to think about home [haemodialysis], being independent from the doctor. This is a tradition. It's always a problem of mind set; it's stronger in the south [of Italy]. (Male nephrologist, 60s, Italy)                                                                |
|                   | The patients that are very afraid of everything in the dialysis room, when an alarm of the machine calls, they get very, very scared so I think that at home they will be very scared, because they would [not] feel safe... (Female nephrologist, 40s, Italy)                                                                                                                                                       |
|                   | Our people are not so educated in health. They are very afraid of taking care of their own disease. (Female nephrologist, 50s, Italy)                                                                                                                                                                                                                                                                                |
|                   | The low socio-economic level of the majority of patients - it's very difficult for them. Many people here don't know how to read... and it's very difficult for them to make the treatment. But I think the principal reason is they don't want to be responsible. (Female nephrologist, 40s, Portugal)                                                                                                              |
|                   | Maybe because of what we tell the patient when he first arrives here so we explain him all the possibilities but... might not talk about home dialysis enough. We don't give enough choice to the patient... (Female nurse, 40s, France)                                                                                                                                                                             |
| Limited awareness | We're obliged to offer them three modalities like haemodialysis, peritoneal dialysis and pre-emptive transplantation...and home haemodialysis ... is not promoted in the sense that we go actively and say, you know, you could also have home haemodialysis. If you feel that the patient is interested then someone would maybe offer it, but we're not promoting it actively. (Female nephrologist, 40s, Germany) |
|                   | I think nephrologists don't talk about it to the patients in most cases. Many patients don't know that it is a possibility. (Female nephrologist, 40s, Portugal)                                                                                                                                                                                                                                                     |
|                   | There isn't educational program for these patients; there is no promotion of home haemodialysis for patients. (Male nephrologist, 50s, Italy)                                                                                                                                                                                                                                                                        |



**Table 4 | Suggestions for overcoming clinician barriers to providing home haemodialysis**

| Barriers                                                                                    | Potential solutions                                                                                                                                                                                                                                                                                                                                                                                                                                                                                                                                                                                                                                                                                                                                                                                                                                                                                                                                                                                                                                                                                                                                                                                                                                                                                                                                                                                                                                                                                                                                                                                                                                                                                                                                                                                              |
|---------------------------------------------------------------------------------------------|------------------------------------------------------------------------------------------------------------------------------------------------------------------------------------------------------------------------------------------------------------------------------------------------------------------------------------------------------------------------------------------------------------------------------------------------------------------------------------------------------------------------------------------------------------------------------------------------------------------------------------------------------------------------------------------------------------------------------------------------------------------------------------------------------------------------------------------------------------------------------------------------------------------------------------------------------------------------------------------------------------------------------------------------------------------------------------------------------------------------------------------------------------------------------------------------------------------------------------------------------------------------------------------------------------------------------------------------------------------------------------------------------------------------------------------------------------------------------------------------------------------------------------------------------------------------------------------------------------------------------------------------------------------------------------------------------------------------------------------------------------------------------------------------------------------|
| <b>Lack of awareness and experience in home haemodialysis</b>                               | <ul style="list-style-type: none"> <li>• Convene regional and national professional education seminars on home haemodialysis</li> <li>• Incorporate home haemodialysis training in nephrology training programs</li> <li>• Develop and disseminate clinical practice guidelines on home haemodialysis</li> <li>• Organise short-term visits to other centres to gain practical experience</li> <li>• Identify local champions (professional advocates) for home haemodialysis</li> <li>• Disseminate home haemodialysis “success stories” through meetings, newsletters, nephrology society communiqués</li> <li>• Establish centralised home haemodialysis training units to conserve resources and attract training staff</li> </ul>                                                                                                                                                                                                                                                                                                                                                                                                                                                                                                                                                                                                                                                                                                                                                                                                                                                                                                                                                                                                                                                                           |
| <b>Concern about patient safety, adequacy of support, and psychosocial burden</b>           | <ul style="list-style-type: none"> <li>• Facilitate collaboration and interaction with professionals who have extensive experience with home haemodialysis</li> <li>• Develop policies addressing patient safety including 24-hour availability of technical and medical support; patient and carer training, individualised patient assessment for home visits or paid carers; patient access to a “parent dialysis centre” in case of complications; regular patient contact; dedicated psychologist/social worker</li> <li>• Ensure laboratory results can be tracked easily by patients and providers</li> <li>• Coordinate independent accreditation to ensure quality of equipment and dialysis solutions; and conducive home environment</li> <li>• Increase knowledge about the potential clinical benefits of home haemodialysis (use data of current practice to establish an evidence base to support research, which will reflect efficacy of outcomes of home programs; and encourage participation in RCTs of home dialysis versus in-centre dialysis to strengthen evidence base for home HD)</li> <li>• Educate clinicians about the availability of current “patient-friendly” home haemodialysis machines (smaller size, minimise need for a family carer to assist)</li> <li>• Demonstrate patient ability cope with home haemodialysis (self-cannulation, operating simple machines)</li> <li>• Emphasise the importance of fostering patient independence and self-care rather than a “learned helplessness”</li> <li>• Provide respite opportunities for home HD patients to avoid patient and/or carer “burn-out”</li> <li>• Promote further development of simplified home HD machines that are portable and don’t require significant plumbing or electrical changes to home</li> </ul> |
| <b>Limited centre capacity in dialysis centres to establish home haemodialysis programs</b> | <ul style="list-style-type: none"> <li>• Allocate resources and dedicated space for training</li> <li>• Provide home HD training facilities that are geographically separate from in-centre HD facilities</li> </ul>                                                                                                                                                                                                                                                                                                                                                                                                                                                                                                                                                                                                                                                                                                                                                                                                                                                                                                                                                                                                                                                                                                                                                                                                                                                                                                                                                                                                                                                                                                                                                                                             |
| <b>Inadequate compensation and financial disadvantage</b>                                   | <ul style="list-style-type: none"> <li>• Emphasise “patient-centred” care within the organisational culture to minimise influence of commercial interests (for example, to incorporate patient-orientated key performance indicators)</li> </ul>                                                                                                                                                                                                                                                                                                                                                                                                                                                                                                                                                                                                                                                                                                                                                                                                                                                                                                                                                                                                                                                                                                                                                                                                                                                                                                                                                                                                                                                                                                                                                                 |

| Barriers                           | Potential solutions                                                                                                                                                                                                                                                                                                                                                                                                                                                                                                                                                                                                                                                            |
|------------------------------------|--------------------------------------------------------------------------------------------------------------------------------------------------------------------------------------------------------------------------------------------------------------------------------------------------------------------------------------------------------------------------------------------------------------------------------------------------------------------------------------------------------------------------------------------------------------------------------------------------------------------------------------------------------------------------------|
|                                    | <ul style="list-style-type: none"><li>• Implement centralization of funding away from commercial interests and reduce physician reimbursement on a fee-for-service model</li><li>• Compensate clinicians for “hidden tasks” including the planning and management of home haemodialysis programs</li><li>• Provide additional financial incentives to units including reimbursement at a higher than cost level</li><li>• Develop public sector funding models that rewards home haemodialysis programs (for example, provide incentive payments for home haemodialysis patients)</li><li>• Defray patients’ out of pocket expenses for home HD (water, electricity)</li></ul> |
| <b>Competing centre priorities</b> | <ul style="list-style-type: none"><li>• Highlight the importance of equity of access to all dialysis modalities (for example, patients may prefer home haemodialysis to in-centre haemodialysis)</li><li>• Provide balanced patient education early in pre-dialysis phase emphasising all dialysis modalities available such that patients are allowed to make an informed choice.</li></ul>                                                                                                                                                                                                                                                                                   |

1  
2  
3  
4  
5  
6  
7  
8  
9  
10  
11  
12  
13  
14  
15  
16  
17  
18  
19  
20  
21  
22  
23  
24  
25  
26  
27  
28  
29  
30  
31  
32  
33  
34  
35  
36  
37  
38  
39  
40  
41  
42  
43  
44  
45  
46  
47  
48  
49

Figure 1 | Thematic Schema

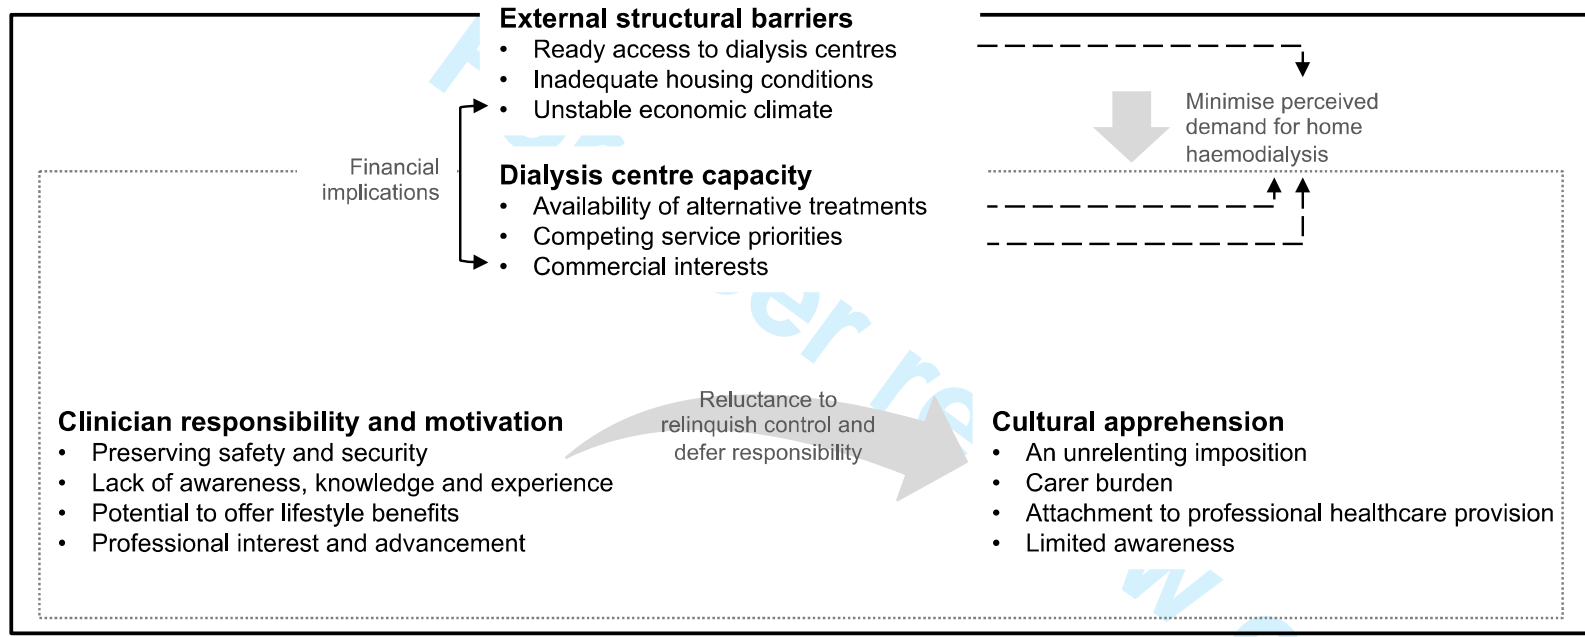

1  
2  
3  
4  
5  
6  
7  
8  
9  
10  
11  
12  
13  
14  
15  
16  
17  
18  
19  
20  
21  
22  
23  
24  
25  
26  
27  
28  
29  
30  
31  
32  
33  
34  
35  
36  
37  
38  
39  
40  
41  
42  
43  
44  
45  
46  
47  
48  
49  
50  
51  
52  
53  
54  
55  
56  
57  
58  
59  
60

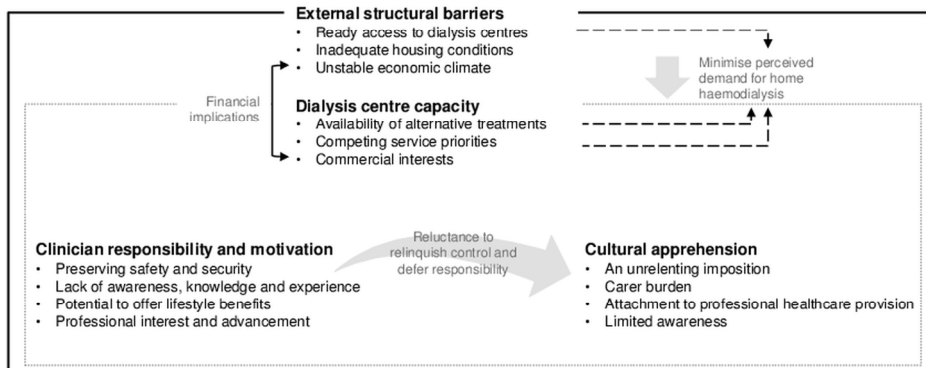

164x90mm (300 x 300 DPI)

review only

## Supplementary File. COREQ Checklist

| No.                                            | Item                                     | Comment                                                                                                  |
|------------------------------------------------|------------------------------------------|----------------------------------------------------------------------------------------------------------|
| <b>Domain 1: Research team and reflexivity</b> |                                          |                                                                                                          |
| 1                                              | Interview/facilitator                    | AT                                                                                                       |
| 2                                              | Credentials                              | AT (PhD, MPH, MM)                                                                                        |
| 3                                              | Occupation                               | AT/MR/LG (Research Fellow); SP/BM/JCC/DWJ/JH/MO/SF/GFMS (Nephrologists)                                  |
| 4                                              | Gender                                   | AT (Female)                                                                                              |
| 5                                              | Experience and training                  | AT has conducted and published qualitative research and lectures in qualitative methods and methodology. |
| 6                                              | Relationship established                 | None                                                                                                     |
| 7                                              | Participant knowledge of the interviewer | AT professional interest in clinical and policy relevant issues in chronic kidney disease.               |
| 8                                              | Interviewer characteristics              | AT is a social researcher with a focus in chronic kidney disease, transplantation and organ donation.    |
| <b>Study design</b>                            |                                          |                                                                                                          |
| 9                                              | Theoretical framework                    | Grounded theory                                                                                          |
| 10                                             | Sampling                                 | Purposive                                                                                                |
| 11                                             | Method of approach                       | Face to face by                                                                                          |
| 12                                             | Sample size                              | Refer to Table 2                                                                                         |
| 13                                             | Non-participation                        | N=1 due to clinical commitments                                                                          |
| 14                                             | Setting of data collection               | Office or hospital meeting room                                                                          |
| 15                                             | Presence of non-participants             | Interpreter                                                                                              |
| 16                                             | Description of sample                    | Refer to Table 2                                                                                         |
| 17                                             | Interview guide                          | See Box 1                                                                                                |
| 18                                             | Repeat interviews                        | Single interview conducted                                                                               |
| 19                                             | Audio/visual recording                   | Interviews were audio recorded                                                                           |
| 20                                             | Field notes                              | AT/MR recorded field notes                                                                               |
| 21                                             | Duration                                 | 25 to 50 minutes                                                                                         |
| 22                                             | Data saturation                          | Yes                                                                                                      |
| 23                                             | Transcripts returned                     | No                                                                                                       |
| <b>Analysis and findings</b>                   |                                          |                                                                                                          |
| 24                                             | Number of data coders                    | AT/MR                                                                                                    |
| 25                                             | Description of the coding tree           | No                                                                                                       |
| 26                                             | Derivation of themes                     | Inductively derived from data                                                                            |
| 27                                             | Software                                 | HyperRESEARCH                                                                                            |
| 28                                             | Participant checking                     | No                                                                                                       |
| 29                                             | Quotations presented                     | Refer to Table 3                                                                                         |
| 30                                             | Data and findings consistent             | Quotations provided to illustrate each theme.                                                            |
| 31                                             | Clarity of major themes                  | Yes                                                                                                      |
| 32                                             | Clarity of minor themes                  | Yes                                                                                                      |
